# Supplementary material
Source: publisher figshare collection journal article supplement (https://gsajournals.figshare.com/ndownloader/files/27628658)
Supplement: Supplementary file 1 [file 27628658]

## Sheet: Structural variants
REF_CHROM	REF_START	REF_END	REF-LEN	SV_TYPE	Q_CHROM	Q_START	Q_END	ID	Q-LEN	COV_REF	COV_Q
Gm01	13092	21959	8867	DEL	Chr01	28432	28432	5	8867	0.000225555	2
Gm01	67560	67661	101	DEL	Chr01	77634	77709	8	26	0.019802	0.0266667
Gm01	71222	74966	3744	DEL	Chr01	81267	81294	9	3717	0.000534188	0.0740741
Gm01	278803	279233	430	DEL	Chr01	285162	285173	11	419	0.00465116	0.181818
Gm01	290429	291202	773	DEL	Chr01	296471	296577	13	667	0.00258732	0.0188679
Gm01	498248	498632	384	DEL	Chr01	504997	504997	18	384	1.13281	5
Gm01	655113	655332	219	DEL	Chr01	660782	660782	24	219	0.00913242	2
Gm01	696089	696102	13	DEL	Chr01	701578	701578	26	13	0.153846	2
Gm01	725002	725018	16	DEL	Chr01	730509	730509	30	16	0.125	2
Gm01	824925	827185	2260	DEL	Chr01	831404	831404	34	2260	2.00044	2
Gm01	849161	849520	359	DEL	Chr01	853647	853647	37	359	0.00557103	2
Gm01	896457	900254	3797	DEL	Chr01	900655	900969	38	3483	0.000526732	0.00636943
Gm01	965226	967205	1979	DEL	Chr01	965996	966011	41	1964	0.00101061	0.133333
Gm01	1118555	1118656	101	DEL	Chr01	1121629	1121645	46	85	0.019802	0.125
Gm01	1171122	1173514	2392	DEL	Chr01	1174109	1174245	47	2256	0.00083612	0.0147059
Gm01	1251186	1253525	2339	DEL	Chr01	1257002	1257002	53	2339	0.000855066	2
Gm01	1258432	1258543	111	DEL	Chr01	1261907	1261907	54	111	0.018018	2
Gm01	1346076	1347048	972	DEL	Chr01	1349485	1350330	56	127	0.00102881	0.00236686
Gm01	1350458	1350818	360	DEL	Chr01	1353707	1353707	57	360	0.00555556	2
Gm01	1399280	1401485	2205	DEL	Chr01	1402188	1404112	58	281	0.000907029	0.0010395
Gm01	1462114	1462723	609	DEL	Chr01	1464841	1465215	59	235	0.00328407	0.00534759
Gm01	1469804	1470253	449	DEL	Chr01	1472307	1472307	61	449	0.00445434	2
Gm01	1659404	1661352	1948	DEL	Chr01	1664569	1666088	66	429	0.00102669	0.00131666
Gm01	1807463	1808720	1257	DEL	Chr01	1815333	1815355	72	1235	0.00159109	0.0909091
Gm01	1945329	1948562	3233	DEL	Chr01	1952642	1952859	75	3016	0.00061862	0.00921659
Gm01	2053637	2054733	1096	DEL	Chr01	2058126	2058625	78	597	0.00182482	0.00400802
Gm01	2076117	2079782	3665	DEL	Chr01	2080138	2080138	83	3665	0.000272851	2
Gm01	2087996	2088486	490	DEL	Chr01	2086651	2086651	85	490	0.00408163	2
Gm01	2096607	2096775	168	DEL	Chr01	2094794	2094794	88	168	0.0119048	2
Gm01	2144531	2145212	681	DEL	Chr01	2142592	2143241	91	32	0.00293686	0.00308166
Gm01	2164301	2164353	52	DEL	Chr01	2163028	2163028	96	52	0.0384615	2
Gm01	2223530	2223889	359	DEL	Chr01	2222275	2222467	104	167	0.00278552	0.0104167
Gm01	2238716	2238848	132	DEL	Chr01	2233925	2233987	105	70	0.0151515	0.0322581
Gm01	2339916	2342247	2331	DEL	Chr01	2338602	2339943	113	990	0.000858001	0.00149142
Gm01	2496109	2497703	1594	DEL	Chr01	2494146	2494287	117	1453	0.00125471	0.0141844
Gm01	2584629	2594649	10020	DEL	Chr01	2581536	2581901	119	9655	0.000199601	0.00547945
Gm01	2629444	2631337	1893	DEL	Chr01	2617218	2617409	122	1702	0.00105652	0.0104712
Gm01	2639784	2639885	101	DEL	Chr01	2625854	2625930	123	25	0.019802	0.0263158
Gm01	2745579	2745724	145	DEL	Chr01	2736168	2736169	127	144	0.0137931	2
Gm01	2758598	2758657	59	DEL	Chr01	2749015	2749015	129	59	0.0338983	2
Gm01	2809005	2810559	1554	DEL	Chr01	2800513	2800513	136	1554	0.001287	2
Gm01	2858319	2859133	814	DEL	Chr01	2847987	2848272	138	529	0.002457	0.00701754
Gm01	2919569	2919582	13	DEL	Chr01	2909740	2909740	145	13	0.153846	2
Gm01	2970228	2972972	2744	DEL	Chr01	2960306	2963040	146	10	0.00327988	2.97403
Gm01	2978848	2979956	1108	DEL	Chr01	2968916	2969230	147	794	0.00722022	3.57006
Gm01	3034746	3034853	107	DEL	Chr01	3024873	3024873	151	107	0.0186916	2
Gm01	3039038	3039207	169	DEL	Chr01	3029107	3029107	153	169	0.0118343	2
Gm01	3212827	3213866	1039	DEL	Chr01	3203133	3203175	159	997	0.00192493	0.047619
Gm01	3285783	3286833	1050	DEL	Chr01	3275143	3276136	162	57	0.00190476	0.0020141
Gm01	3370462	3372107	1645	DEL	Chr01	3360396	3360416	171	1625	0.00121581	0.1
Gm01	3493773	3502230	8457	DEL	Chr01	3484792	3484792	180	8457	0.000118245	1
Gm01	3531773	3531889	116	DEL	Chr01	3515052	3515076	182	92	0.0172414	0.0833333
Gm01	3549393	3549822	429	DEL	Chr01	3532539	3532724	183	244	0.004662	0.0108108
Gm01	3572748	3573073	325	DEL	Chr01	3555662	3555663	185	324	0.00615385	2
Gm01	3610326	3610499	173	DEL	Chr01	3592857	3592857	189	173	0.0115607	2
Gm01	3619902	3620577	675	DEL	Chr01	3602273	3602286	190	662	0.00296296	0.153846
Gm01	3662789	3672790	10001	DEL	Chr01	3644440	3646979	191	7462	0.00019998	0.000787712
Gm01	3702621	3702997	376	DEL	Chr01	3676778	3676785	192	369	0.00531915	0.285714
Gm01	3721209	3723745	2536	DEL	Chr01	3694990	3694993	193	2533	0.000788644	0.666667
Gm01	3728504	3730222	1718	DEL	Chr01	3699747	3701336	194	129	0.00116414	0.00125865
Gm01	3740481	3740715	234	DEL	Chr01	3711553	3711553	196	234	0.00854701	2
Gm01	3746648	3752248	5600	DEL	Chr01	3717895	3718231	198	5264	0.000357143	0.00595238
Gm01	3753762	3753766	4	DEL	Chr01	3719746	3719746	200	4	0.25	2
Gm01	3757089	3757533	444	DEL	Chr01	3722899	3722901	201	442	0.0045045	1
Gm01	3836277	3836466	189	DEL	Chr01	3802560	3802580	207	169	0.010582	0.1
Gm01	3841751	3852962	11211	DEL	Chr01	3807824	3807824	209	11211	0.000178396	2
Gm01	3905354	3906719	1365	DEL	Chr01	3861779	3862030	217	1114	0.0014652	0.00796813
Gm01	3965596	3968760	3164	DEL	Chr01	3920946	3922023	218	2087	0.000632111	0.00185701
Gm01	4022883	4023022	139	DEL	Chr01	3976271	3976271	221	139	0.0143885	2
Gm01	4047150	4048411	1261	DEL	Chr01	4001662	4001990	223	933	0.00237906	0.868902
Gm01	4088561	4090008	1447	DEL	Chr01	4042235	4042331	224	1351	0.00138217	0.0208333
Gm01	4366680	4366783	103	DEL	Chr01	4320189	4320189	232	103	0.0194175	2
Gm01	4515505	4516328	823	DEL	Chr01	4473495	4473512	237	806	0.00243013	0.117647
Gm01	4533468	4534437	969	DEL	Chr01	4492128	4492973	240	124	0.00206398	0.00236686
Gm01	4561084	4561185	101	DEL	Chr01	4519651	4519720	241	32	0.019802	0.0289855
Gm01	4659339	4660177	838	DEL	Chr01	4619942	4619942	247	838	0.00238663	2
Gm01	4707184	4707871	687	DEL	Chr01	4667183	4667183	251	687	0.00291121	2
Gm01	4719209	4719293	84	DEL	Chr01	4678494	4678494	253	84	0.0238095	2
Gm01	4895897	4896034	137	DEL	Chr01	4855120	4855256	256	1	0.0145985	0.0147059
Gm01	4948902	4949199	297	DEL	Chr01	4908175	4908183	258	289	0.00673401	0.25
Gm01	5056243	5058338	2095	DEL	Chr01	5015570	5015659	263	2006	0.000954654	0.0224719
Gm01	5211127	5212953	1826	DEL	Chr01	5172909	5173521	272	1214	0.00109529	0.00326797
Gm01	5321845	5324055	2210	DEL	Chr01	5282436	5284447	274	199	0.000904977	0.00099453
Gm01	5470151	5473316	3165	DEL	Chr01	5430556	5432305	277	1416	0.000315956	0.00114351
Gm01	5540609	5542554	1945	DEL	Chr01	5505046	5505476	282	1515	0.00102828	0.00465116
Gm01	5591346	5591818	472	DEL	Chr01	5554821	5555291	286	2	0.00423729	0.00425532
Gm01	5866082	5866186	104	DEL	Chr01	5829665	5829701	291	68	0.0192308	0.0555556
Gm01	5963186	5963534	348	DEL	Chr01	5926709	5926864	292	193	0.00574713	0.0129032
Gm01	6016959	6018344	1385	DEL	Chr01	5980306	5980554	293	1137	0.00144404	0.00806452
Gm01	6103601	6104528	927	DEL	Chr01	6066116	6067041	300	2	0.0021575	0.00216216
Gm01	6306468	6306729	261	DEL	Chr01	6269721	6269980	304	2	0.00766284	0.00772201
Gm01	6416422	6416693	271	DEL	Chr01	6380926	6380969	307	228	0.00738007	0.0465116
Gm01	6890735	6890864	129	DEL	Chr01	6866153	6866280	321	2	0.0155039	0.015748
Gm01	6895634	6899731	4097	DEL	Chr01	6871044	6871044	323	4097	0.000488162	2
Gm01	7056054	7066055	10001	DEL	Chr01	7027370	7029944	327	7427	0.00019998	0.0003885
Gm01	7287447	7297566	10119	DEL	Chr01	7252758	7259880	332	2997	0.000197648	0.00028082
Gm01	7680673	7680774	101	DEL	Chr01	7645918	7645988	338	31	0.019802	0.0285714
Gm01	8041084	8053573	12489	DEL	Chr01	8008030	8011777	343	8742	2.77292	0.536696
Gm01	8400948	8403077	2129	DEL	Chr01	8365153	8365446	347	1836	0.000939408	0.00682594
Gm01	8406361	8406469	108	DEL	Chr01	8368980	8369025	349	63	0.0185185	0.0444444
Gm01	8523769	8524001	232	DEL	Chr01	8486588	8486639	351	181	0.00862069	0.0392157
Gm01	8673586	8673687	101	DEL	Chr01	8638643	8638645	354	99	0.019802	1
Gm01	8996115	8997694	1579	DEL	Chr01	8963847	8963942	368	1484	0.184294	0.0210526
Gm01	9032384	9032481	97	DEL	Chr01	8998632	8998633	369	96	0.0206186	2
Gm01	9112419	9112520	101	DEL	Chr01	9078592	9078681	370	12	0.019802	0.0224719
Gm01	9119659	9121853	2194	DEL	Chr01	9086320	9086404	372	2110	0.000911577	0.0238095
Gm01	9197794	9197796	2	DEL	Chr01	9163414	9163414	380	2	1	2
Gm01	9398495	9398596	101	DEL	Chr01	9367217	9367250	389	68	0.019802	0.0606061
Gm01	9537530	9538467	937	DEL	Chr01	9506234	9506258	391	913	0.00213447	0.0833333
Gm01	9770251	9771348	1097	DEL	Chr01	9738209	9738421	395	885	0.00182315	0.00943396
Gm01	10026706	10026711	5	DEL	Chr01	9997128	9997128	407	5	0.4	2
Gm01	10387938	10388344	406	DEL	Chr01	10370968	10370968	422	406	0.00246305	2
Gm01	10534741	10537361	2620	DEL	Chr01	10517236	10517333	426	2523	0.000763359	0.0206186
Gm01	10743082	10743766	684	DEL	Chr01	10733428	10733444	438	668	0.00292398	0.125
Gm01	10804185	10804318	133	DEL	Chr01	10793843	10793884	440	92	0.0150376	0.0487805
Gm01	10860555	10886497	25942	DEL	Chr01	10846512	10846512	452	25942	0	2
Gm01	11074796	11074897	101	DEL	Chr01	11028309	11028324	460	86	0.019802	0.133333
Gm01	11141843	11142561	718	DEL	Chr01	11097298	11097298	465	718	0.00278552	2
Gm01	11146545	11153890	7345	DEL	Chr01	11101278	11101278	467	7345	6.35398	2
Gm01	11177836	11178596	760	DEL	Chr01	11125276	11125986	471	50	0.00131579	0.0028169
Gm01	11247594	11247728	134	DEL	Chr01	11194952	11194977	472	109	0.0149254	0.08
Gm01	11347596	11347619	23	DEL	Chr01	11299537	11299537	476	23	0.0869565	2
Gm01	11496670	11496815	145	DEL	Chr01	11448688	11448742	478	91	0.0137931	0.037037
Gm01	11681007	11683763	2756	DEL	Chr01	11632774	11632794	479	2736	0.000725689	0.1
Gm01	11781706	11782830	1124	DEL	Chr01	11730680	11730680	482	1124	0.00266904	2
Gm01	11842024	11861938	19914	DEL	Chr01	11789966	11789966	485	19914	0.000100432	2
Gm01	11970808	11976140	5332	DEL	Chr01	11911967	11911967	499	5332	2.90323	2
Gm01	12044115	12044128	13	DEL	Chr01	11987200	11987200	504	13	0.153846	2
Gm01	12050059	12050086	27	DEL	Chr01	11993106	11993106	506	27	0.0740741	2
Gm01	12090787	12090819	32	DEL	Chr01	12033769	12033769	508	32	0.0625	2
Gm01	12104978	12104983	5	DEL	Chr01	12050274	12050274	514	5	0.2	2
Gm01	12113137	12113165	28	DEL	Chr01	12056537	12056537	516	28	0.0714286	2
Gm01	12159005	12175466	16461	DEL	Chr01	12094460	12094464	522	16457	0.528097	0.5
Gm01	12193550	12195267	1717	DEL	Chr01	12123882	12123884	529	1715	0.00116482	0.5
Gm01	12248036	12264982	16946	DEL	Chr01	12142551	12142551	531	16946	0.000118022	2
Gm01	12287521	12287684	163	DEL	Chr01	12160771	12160893	532	41	0.0122699	0.0163934
Gm01	12294912	12295357	445	DEL	Chr01	12168129	12168129	534	445	0.00449438	2
Gm01	12446141	12446163	22	DEL	Chr01	12321479	12321479	546	22	0.0909091	2
Gm01	12542373	12544502	2129	DEL	Chr01	12448195	12450042	551	282	0.000939408	0.00108284
Gm01	12591358	12591573	215	DEL	Chr01	12499825	12499825	560	215	0.00930233	2
Gm01	12727648	12734703	7055	DEL	Chr01	12640271	12640271	567	7055	0.000283487	2
Gm01	12764174	12770399	6225	DEL	Chr01	12668668	12668668	569	6225	8.67422	2
Gm01	12809877	12810857	980	DEL	Chr01	12708205	12708767	572	418	0.00204082	0.00355872
Gm01	12857067	12857168	101	DEL	Chr01	12759078	12759123	575	56	0.019802	0.0444444
Gm01	12859471	12862435	2964	DEL	Chr01	12761426	12762482	576	1908	0.000674764	0.00189394
Gm01	12908923	12909026	103	DEL	Chr01	12810149	12810215	579	37	0.0194175	0.030303
Gm01	12997586	12997705	119	DEL	Chr01	12899589	12899589	584	119	0.0168067	2
Gm01	13067945	13068396	451	DEL	Chr01	12969143	12969143	589	451	0.00443459	2
Gm01	13293081	13293296	215	DEL	Chr01	13204354	13204376	601	193	0.00930233	0.0909091
Gm01	13798949	13799055	106	DEL	Chr01	16588058	16588058	610	106	0.0188679	2
Gm01	13812038	13813049	1011	DEL	Chr01	16601044	16601972	611	83	0.00197824	0.00215517
Gm01	13867244	13868294	1050	DEL	Chr01	16665467	16665557	614	960	0.00190476	0.0222222
Gm01	13909598	13909649	51	DEL	Chr01	16706840	16706840	616	51	0.0392157	2
Gm01	14055308	14055584	276	DEL	Chr01	16445066	16445066	626	276	0.00724638	2
Gm01	14062284	14062596	312	DEL	Chr01	16438370	16438370	627	312	0.00641026	2
Gm01	14101613	14101768	155	DEL	Chr01	16397029	16397106	630	78	0.0129032	0.025974
Gm01	14106805	14113734	6929	DEL	Chr01	16391375	16392035	631	6269	19.0297	0.0030303
Gm01	14335072	14335293	221	DEL	Chr01	16153800	16153800	656	221	0.00904977	2
Gm01	14344253	14352503	8250	DEL	Chr01	16151434	16151434	662	8250	1.26291	2
Gm01	14356922	14374135	17213	DEL	Chr01	16148184	16149454	663	15943	0.000116191	0.0015748
Gm01	14430300	14431485	1185	DEL	Chr01	16073120	16073120	672	1185	0.000843882	2
Gm01	14483462	14484551	1089	DEL	Chr01	16013726	16013726	682	1089	0.00183655	2
Gm01	14525106	14525566	460	DEL	Chr01	15982841	15982841	686	460	0.00434783	2
Gm01	14582026	14597200	15174	DEL	Chr01	15898608	15898608	695	15174	0.000131804	2
Gm01	14680057	14680274	217	DEL	Chr01	15815637	15815662	697	192	0.00921659	0.08
Gm01	14716397	14716895	498	DEL	Chr01	15795364	15795364	701	498	0	1
Gm01	14734891	14735326	435	DEL	Chr01	17251100	17251100	705	435	0.0045977	2
Gm01	14748351	14755995	7644	DEL	Chr01	17264112	17264112	707	7644	0.000261643	2
Gm01	14780587	14785650	5063	DEL	Chr01	17288799	17289052	713	4810	0.000197511	0.00395257
Gm01	14804039	14805080	1041	DEL	Chr01	17315091	17316131	716	1	0.00192123	0.00192308
Gm01	14838029	14838961	932	DEL	Chr01	17350294	17350294	724	932	0.00107296	1
Gm01	14863042	14866548	3506	DEL	Chr01	17377889	17377889	728	3506	0.000570451	2
Gm01	14922915	14923327	412	DEL	Chr01	17447522	17447811	738	123	0.00485437	0.00692042
Gm01	14927273	14928410	1137	DEL	Chr01	17451758	17451758	740	1137	0.00175901	2
Gm01	15291333	15306378	15045	DEL	Chr01	17188988	17188988	763	15045	6.64673e-05	1
Gm01	15579187	15579303	116	DEL	Chr01	16871556	16871562	785	110	0.0172414	0.333333
Gm01	15636418	15637423	1005	DEL	Chr01	16804621	16804621	792	1005	0.00199005	2
Gm01	15664286	15664380	94	DEL	Chr01	16770034	16770034	796	94	0.0212766	2
Gm01	15677008	15680723	3715	DEL	Chr01	16754785	16757412	797	1088	0.000538358	0.000761325
Gm01	15685938	15696672	10734	DEL	Chr01	16749557	16749557	800	10734	0.000279486	1
Gm01	16350281	16352240	1959	DEL	Chr01	15738447	15739264	816	1142	0.00102093	0.00244798
Gm01	16357407	16357603	196	DEL	Chr01	15716872	15716874	823	194	0.0102041	1
Gm01	16373232	16378543	5311	DEL	Chr01	15691127	15691852	826	4586	0.000376577	0.00275862
Gm01	16393201	16395116	1915	DEL	Chr01	15675308	15675308	830	1915	0.00104439	2
Gm01	16398672	16399063	391	DEL	Chr01	15671428	15671757	831	62	0.00511509	0.00607903
Gm01	16405829	16413114	7285	DEL	Chr01	15656720	15656720	834	7285	0.000274537	1
Gm01	16467280	16467785	505	DEL	Chr01	15580735	15580889	850	351	0.0039604	0.00649351
Gm01	16469839	16469864	25	DEL	Chr01	15578680	15578680	852	25	0.08	2
Gm01	16562889	16562892	3	DEL	Chr01	15473761	15473761	857	3	0.666667	2
Gm01	16584133	16584233	100	DEL	Chr01	15452532	15452532	858	100	0.02	2
Gm01	16600760	16601106	346	DEL	Chr01	15435975	15436003	859	318	0.00578035	0.0714286
Gm01	16714528	16718461	3933	DEL	Chr01	15316910	15316914	875	3929	0.000508518	0.5
Gm01	16725765	16730360	4595	DEL	Chr01	15309603	15309603	877	4595	0.000435256	2
Gm01	16903386	16903528	142	DEL	Chr01	15133642	15133642	883	142	0.0140845	1
Gm01	17141480	17141891	411	DEL	Chr01	14894877	14894877	889	411	0.00486618	2
Gm01	17154210	17154245	35	DEL	Chr01	14882571	14882571	891	35	0.0571429	2
Gm01	17217087	17217382	295	DEL	Chr01	14819734	14819757	892	272	0.00677966	0.0869565
Gm01	17223030	17230871	7841	DEL	Chr01	14806427	14806427	895	7841	0.429665	2
Gm01	17647383	17648183	800	DEL	Chr01	14379683	14380213	901	270	0.0025	0.00377358
Gm01	17716224	17719283	3059	DEL	Chr01	14309812	14311640	902	1231	0.00457666	6.75274
Gm01	17826137	17826756	619	DEL	Chr01	14199527	14199527	909	619	0.00323102	3
Gm01	18026081	18026182	101	DEL	Chr01	13999475	13999519	913	57	0.019802	0.0454545
Gm01	18058190	18058614	424	DEL	Chr01	13967397	13967473	914	348	0.00471698	0.0263158
Gm01	18166901	18167088	187	DEL	Chr01	13837710	13837710	922	187	0.0106952	3
Gm01	18275126	18275140	14	DEL	Chr01	13729851	13729851	924	14	0.142857	2
Gm01	18318177	18318178	1	DEL	Chr01	13686848	13686848	926	1	2	2
Gm01	18567120	18567221	101	DEL	Chr01	13434742	13434742	935	101	0.019802	1
Gm01	19110207	19110279	72	DEL	Chr01	17965888	17965888	944	72	0.0277778	2
Gm01	19195110	19195219	109	DEL	Chr01	18050673	18050687	945	95	0.0183486	0.142857
Gm01	19443186	19444072	886	DEL	Chr01	18298045	18298045	956	886	0.00225734	1
Gm01	20042307	20043552	1245	DEL	Chr01	18902754	18903847	964	152	0.00160643	0.00182983
Gm01	20173124	20173134	10	DEL	Chr01	19033713	19033713	969	10	0.2	2
Gm01	20419121	20419416	295	DEL	Chr01	19280600	19280881	978	14	0.00677966	0.00711744
Gm01	21118181	21133102	14921	DEL	Chr01	21185020	21185020	994	14921	0.000134039	2
Gm01	21189563	21189665	102	DEL	Chr01	21130204	21130204	999	102	0.0294118	2
Gm01	21222431	21222505	74	DEL	Chr01	21098042	21098042	1033	74	0.0135135	1
Gm01	21941719	21941823	104	DEL	Chr01	20340714	20340714	1072	104	0.0192308	2
Gm01	22082450	22085305	2855	DEL	Chr01	20197284	20197917	1075	2222	0.000700525	0.00157978
Gm01	22086978	22094992	8014	DEL	Chr01	20184946	20189390	1078	3570	0.000249563	0.000225023
Gm01	22491453	22500021	8568	DEL	Chr01	19806167	19806167	1104	8568	0	5
Gm01	23494876	23495405	529	DEL	Chr01	20768314	20768416	1158	427	0.00189036	0.0294118
Gm01	23695800	23696022	222	DEL	Chr01	21392522	21392582	1161	162	0.00900901	0.0333333
Gm01	23697082	23698035	953	DEL	Chr01	21393644	21393695	1162	902	0.00209864	0.0392157
Gm01	23789793	23795207	5414	DEL	Chr01	21489436	21489485	1166	5365	0.000369413	0.0408163
Gm01	23802158	23802259	101	DEL	Chr01	21496409	21496458	1167	52	0.019802	0.0408163
Gm01	23897864	23897950	86	DEL	Chr01	21601122	21601122	1172	86	0.0232558	2
Gm01	24125727	24126561	834	DEL	Chr01	21831903	21832217	1180	520	0.00239808	0.00636943
Gm01	24346353	24346491	138	DEL	Chr01	22052792	22052851	1183	79	0.0144928	0.0338983
Gm01	24490554	24490568	14	DEL	Chr01	22201351	22201351	1189	14	0.142857	2
Gm01	24844820	24845443	623	DEL	Chr01	22555663	22556156	1191	130	0.00321027	0.0040568
Gm01	25204565	25204666	101	DEL	Chr01	22923459	22923499	1199	61	0.019802	0.05
Gm01	25246711	25246902	191	DEL	Chr01	22965535	22965629	1200	97	0.0104712	0.0212766
Gm01	25849783	25851661	1878	DEL	Chr01	23570377	23571213	1209	1042	0.00106496	0.00239234
Gm01	26178520	26178522	2	DEL	Chr01	23905728	23905728	1218	2	1	2
Gm01	26271858	26271952	94	DEL	Chr01	23999902	23999902	1222	94	0.0212766	3
Gm01	26432984	26433085	101	DEL	Chr01	24162467	24162535	1227	33	0.019802	0.0294118
Gm01	26443096	26460542	17446	DEL	Chr01	24172574	24173353	1228	16667	0.000114639	0.00256739
Gm01	26485852	26486251	399	DEL	Chr01	24198657	24198657	1230	399	0.00501253	2
Gm01	26515991	26516703	712	DEL	Chr01	24228406	24228936	1231	182	0.00280899	0.00377358
Gm01	26535116	26535318	202	DEL	Chr01	24247374	24247374	1232	202	0.00990099	2
Gm01	26726341	26726342	1	DEL	Chr01	24439307	24439307	1241	1	2	2
Gm01	26764209	26768192	3983	DEL	Chr01	24477015	24477016	1244	3982	0.000502134	2
Gm01	26945633	26945737	104	DEL	Chr01	24654369	24654445	1247	28	0.0192308	0.0263158
Gm01	26948275	26948376	101	DEL	Chr01	24656985	24656992	1248	94	0.019802	0.285714
Gm01	26949665	26951892	2227	DEL	Chr01	24658275	24658575	1249	1927	0.000898069	0.00666667
Gm01	26957096	26967097	10001	DEL	Chr01	24663791	24667878	1250	5914	0.00019998	0.000489356
Gm01	27003927	27004032	105	DEL	Chr01	24704694	24704755	1252	44	0.0190476	0.0327869
Gm01	27105062	27105734	672	DEL	Chr01	24808013	24808104	1257	581	0.00297619	0.021978
Gm01	27107509	27108941	1432	DEL	Chr01	24809869	24810971	1258	330	0.00139665	0.00181488
Gm01	27154941	27154968	27	DEL	Chr01	24856949	24856949	1261	27	0.0740741	2
Gm01	27279633	27298765	19132	DEL	Chr01	24985223	24985223	1269	19132	0.000104537	2
Gm01	27331216	27331317	101	DEL	Chr01	25027134	25027164	1273	71	0.019802	0.0666667
Gm01	27339276	27339283	7	DEL	Chr01	25035633	25035633	1276	7	0.285714	2
Gm01	27408321	27408346	25	DEL	Chr01	25104628	25104628	1278	25	0.08	2
Gm01	27648644	27648763	119	DEL	Chr01	25300922	25300924	1285	117	0.0168067	1
Gm01	27766434	27771822	5388	DEL	Chr01	25450629	25450630	1298	5387	0.000371195	2
Gm01	27774919	27775044	125	DEL	Chr01	25453723	25453775	1299	73	0.016	0.0384615
Gm01	27787922	27788335	413	DEL	Chr01	25466699	25466699	1303	413	0.00484262	2
Gm01	28043988	28044210	222	DEL	Chr01	25722806	25723027	1310	1	0.00900901	0.00904977
Gm01	28076078	28076113	35	DEL	Chr01	25754836	25754836	1312	35	0.0571429	2
Gm01	28097162	28097206	44	DEL	Chr01	25777379	25777379	1316	44	0.0454545	2
Gm01	28164641	28165174	533	DEL	Chr01	25844766	25844766	1319	533	0.00375235	2
Gm01	28173895	28174046	151	DEL	Chr01	25853471	25853593	1320	29	0.013245	0.0163934
Gm01	28202388	28205124	2736	DEL	Chr01	25881916	25882275	1321	2377	0.000730994	0.00557103
Gm01	28211887	28211890	3	DEL	Chr01	25889039	25889039	1323	3	0.666667	2
Gm01	28273530	28273634	104	DEL	Chr01	25950784	25950868	1325	20	0.0192308	2.04762
Gm01	28393283	28393720	437	DEL	Chr01	26072387	26072387	1330	437	0.00457666	2
Gm01	28414166	28426028	11862	DEL	Chr01	26092796	26092796	1332	11862	0.000168606	2
Gm01	28666867	28670459	3592	DEL	Chr01	26317178	26319480	1336	1290	0.000835189	2.14683
Gm01	28678881	28679001	120	DEL	Chr01	26327902	26327982	1337	40	0.1	3.0625
Gm01	28726421	28726528	107	DEL	Chr01	26377280	26377280	1339	107	0.0186916	3
Gm01	28766689	28766950	261	DEL	Chr01	26418457	26418457	1343	261	0.00766284	2
Gm01	28768776	28768787	11	DEL	Chr01	26420261	26420261	1345	11	0.181818	2
Gm01	28810769	28811109	340	DEL	Chr01	26462226	26462226	1347	340	0.00588235	2
Gm01	28865504	28865704	200	DEL	Chr01	26517426	26517426	1350	200	0.01	2
Gm01	28939433	28939561	128	DEL	Chr01	26573263	26573263	1357	128	0.015625	2
Gm01	29007400	29010383	2983	DEL	Chr01	26623744	26623744	1360	2983	0.000335233	2
Gm01	29026674	29026775	101	DEL	Chr01	26640025	26640025	1362	101	0.019802	2
Gm01	29031694	29033966	2272	DEL	Chr01	26644744	26645257	1363	1759	0.000880282	0.00389864
Gm01	29051050	29051056	6	DEL	Chr01	26662341	26662341	1365	6	0.333333	2
Gm01	29103889	29104192	303	DEL	Chr01	26715337	26715438	1370	202	0.00330033	0.019802
Gm01	29110389	29114434	4045	DEL	Chr01	27344686	27344687	1372	4044	0.000988875	5
Gm01	29497625	29498080	455	DEL	Chr01	26758512	26758512	1382	455	0.989011	3
Gm01	29522439	29522701	262	DEL	Chr01	26782800	26782870	1384	192	0.00763359	0.0285714
Gm01	29613116	29618986	5870	DEL	Chr01	26873281	26873281	1387	5870	0.972743	2
Gm01	29621592	29638911	17319	DEL	Chr01	26875883	26880989	1391	12213	5.77401e-05	0.000587544
Gm01	29965889	29965890	1	DEL	Chr01	28298865	28298865	1397	1	2	1
Gm01	29975108	29975243	135	DEL	Chr01	28289645	28289646	1398	134	0.0148148	2
Gm01	30085439	30087076	1637	DEL	Chr01	28190132	28190132	1404	1637	0.513745	2
Gm01	30091008	30091021	13	DEL	Chr01	28188357	28188357	1406	13	0.153846	2
Gm01	30093417	30094327	910	DEL	Chr01	28178586	28178586	1408	910	0.0021978	1
Gm01	30100994	30100999	5	DEL	Chr01	28171601	28171601	1412	5	0.4	2
Gm01	30118878	30118921	43	DEL	Chr01	28153772	28153772	1414	43	0.0465116	2
Gm01	30128234	30130766	2532	DEL	Chr01	28143108	28144467	1415	1173	0.000789889	0.00147167
Gm01	30333059	30333076	17	DEL	Chr01	27912759	27912760	1426	16	0.0588235	3
Gm01	30416905	30419560	2655	DEL	Chr01	27819911	27819911	1433	2655	0.000753296	2
Gm01	30528513	30529724	1211	DEL	Chr01	27710825	27710976	1434	1060	0.00165153	0.013245
Gm01	30545430	30545441	11	DEL	Chr01	27695119	27695119	1436	11	0.181818	2
Gm01	30628731	30637957	9226	DEL	Chr01	27587369	27587369	1445	9226	4.70442	2
Gm01	30720895	30728825	7930	DEL	Chr01	26985679	26985679	1450	7930	3.49798	2
Gm01	30769469	30769470	1	DEL	Chr01	26945014	26945014	1453	1	2	1
Gm01	30862197	30862341	144	DEL	Chr01	28469055	28469074	1455	125	0.0138889	0.105263
Gm01	30925943	30926882	939	DEL	Chr01	28536195	28536220	1461	914	0.00212993	0.08
Gm01	30930666	30930781	115	DEL	Chr01	28540002	28540002	1463	115	0.0173913	2
Gm01	30947674	30949708	2034	DEL	Chr01	28556888	28556958	1464	1964	0.000983284	0.0285714
Gm01	30956016	30956155	139	DEL	Chr01	28563268	28563354	1465	53	0.0143885	0.0232558
Gm01	30998830	30999560	730	DEL	Chr01	28611979	28611979	1473	730	0.00273973	2
Gm01	31034697	31055215	20518	DEL	Chr01	28647210	28647210	1476	20518	0.891364	2
Gm01	31218814	31219896	1082	DEL	Chr01	28811721	28811721	1479	1082	0.00462107	5
Gm01	31240082	31241418	1336	DEL	Chr01	28849048	28849063	1484	1321	0.00149701	0.133333
Gm01	31259943	31263236	3293	DEL	Chr01	28860840	28860840	1488	3293	0	2
Gm01	31305175	31305176	1	DEL	Chr01	28895215	28895215	1490	1	2	2
Gm01	31423852	31424327	475	DEL	Chr01	29032208	29032591	1494	92	0.00421053	0.00522193
Gm01	31429542	31429643	101	DEL	Chr01	29037795	29037844	1495	52	0.019802	0.0408163
Gm01	31444143	31444742	599	DEL	Chr01	29052319	29052451	1496	467	0.0033389	0.0151515
Gm01	31473910	31475247	1337	DEL	Chr01	29081623	29081623	1498	1337	0.00149589	2
Gm01	31555569	31555705	136	DEL	Chr01	29160242	29160242	1501	136	0.0147059	2
Gm01	31580933	31585136	4203	DEL	Chr01	29185367	29185367	1503	4203	0.000475851	2
Gm01	31643852	31644071	219	DEL	Chr01	29243553	29243553	1507	219	0.00913242	2
Gm01	31783864	31785764	1900	DEL	Chr01	29386767	29386767	1519	1900	0.000526316	2
Gm01	31834081	31834110	29	DEL	Chr01	29417533	29417533	1521	29	0.0689655	2
Gm01	31862635	31868635	6000	DEL	Chr01	29446034	29446137	1524	5897	0.000333333	0.0291262
Gm01	31895864	31895875	11	DEL	Chr01	31867582	31867582	1527	11	0.181818	1
Gm01	32063784	32065295	1511	DEL	Chr01	31698630	31699169	1530	972	0.00132363	0.00185529
Gm01	32106849	32107923	1074	DEL	Chr01	31656970	31657068	1531	976	0.0018622	0.0204082
Gm01	32133765	32134998	1233	DEL	Chr01	31625017	31625047	1534	1203	0.00162206	0.0666667
Gm01	32192675	32202589	9914	DEL	Chr01	31582479	31582621	1545	9772	22.5734	0.0140845
Gm01	32463168	32472907	9739	DEL	Chr01	31304409	31304452	1558	9696	0.992915	0.0465116
Gm01	32497808	32499724	1916	DEL	Chr01	31279502	31279502	1560	1916	0.00104384	2
Gm01	32576067	32576136	69	DEL	Chr01	31202926	31202926	1564	69	0.0289855	2
Gm01	32603269	32603736	467	DEL	Chr01	31174827	31174827	1566	467	0.00428266	1
Gm01	32773859	32774203	344	DEL	Chr01	31004349	31004349	1571	344	0.00290698	2
Gm01	32803821	32805069	1248	DEL	Chr01	30985912	30985912	1578	1248	0.00160256	2
Gm01	32829145	32829804	659	DEL	Chr01	30961555	30961555	1580	659	0.0030349	1
Gm01	32855941	32856102	161	DEL	Chr01	30935253	30935253	1583	161	0.0124224	2
Gm01	32891294	32897989	6695	DEL	Chr01	30900045	30900045	1585	6695	0.00029873	2
Gm01	32949184	32949890	706	DEL	Chr01	30848683	30848954	1588	435	0.00283286	0.00738007
Gm01	32978624	32978725	101	DEL	Chr01	30819890	30819948	1589	43	0.019802	0.0344828
Gm01	33009313	33009318	5	DEL	Chr01	30789228	30789228	1593	5	0.4	2
Gm01	33029325	33029891	566	DEL	Chr01	30768801	30769254	1594	113	0.00353357	0.00441501
Gm01	33060523	33061375	852	DEL	Chr01	30738118	30738128	1595	842	0.00234742	0.2
Gm01	33285479	33286885	1406	DEL	Chr01	30513170	30513985	1598	591	0.00142248	0.00245399
Gm01	33400339	33410098	9759	DEL	Chr01	30395332	30395332	1603	9759	0.902347	2
Gm01	33847978	33848210	232	DEL	Chr01	29955319	29955411	1608	140	0.00862069	0.0217391
Gm01	33937586	33938428	842	DEL	Chr01	29865243	29865243	1612	842	0.0023753	2
Gm01	34033128	34033247	119	DEL	Chr01	29767361	29767409	1624	71	0.0168067	0.0416667
Gm01	34095643	34095744	101	DEL	Chr01	29704860	29704873	1626	88	0.019802	0.153846
Gm01	34201672	34203396	1724	DEL	Chr01	29596106	29597607	1632	223	0.00116009	0.00133245
Gm01	34208008	34208109	101	DEL	Chr01	29591206	29591253	1634	54	0.019802	0.0425532
Gm01	34298620	34307483	8863	DEL	Chr01	29497612	29500733	1635	5742	0.916168	0.00064082
Gm01	34309015	34309154	139	DEL	Chr01	29495997	29496078	1636	58	0.0143885	0.0246914
Gm01	34320203	34322661	2458	DEL	Chr01	29476788	29476788	1641	2458	0.00081367	1
Gm01	34405307	34405848	541	DEL	Chr01	33726260	33726260	1646	541	0.00369686	2
Gm01	34605677	34605778	101	DEL	Chr01	33934881	33934889	1652	93	0.019802	0.25
Gm01	34640466	34675825	35359	DEL	Chr01	33969574	33980603	1655	24330	0.433355	3.78384
Gm01	34724738	34726718	1980	DEL	Chr01	33999363	33999363	1660	1980	0.0010101	1
Gm01	34762318	34762795	477	DEL	Chr01	34029663	34029663	1662	477	0.00419287	2
Gm01	34835113	34844235	9122	DEL	Chr01	34106550	34106550	1666	9122	0.616751	2
Gm01	34865128	34865170	42	DEL	Chr01	34127434	34127434	1668	42	0.047619	2
Gm01	34884358	34884479	121	DEL	Chr01	34146630	34146630	1670	121	0.0165289	2
Gm01	34945777	34945991	214	DEL	Chr01	34228746	34228746	1677	214	0.00934579	2
Gm01	34979485	34979490	5	DEL	Chr01	34267558	34267558	1681	5	0.4	2
Gm01	35029850	35029889	39	DEL	Chr01	34317869	34317869	1683	39	0.0512821	2
Gm01	35221417	35222413	996	DEL	Chr01	34514397	34515345	1691	48	0.00200803	0.0021097
Gm01	35262281	35268453	6172	DEL	Chr01	34556130	34556130	1696	6172	0.000324044	2
Gm01	35410748	35410879	131	DEL	Chr01	34682068	34682068	1703	131	0.0152672	2
Gm01	35434794	35435015	221	DEL	Chr01	34706907	34706907	1706	221	0.00904977	2
Gm01	35437439	35446734	9295	DEL	Chr01	34709331	34709331	1708	9295	9.06057	2
Gm01	35508377	35509265	888	DEL	Chr01	34771002	34771494	1711	396	0.00225225	0.00406504
Gm01	35631811	35631823	12	DEL	Chr01	34894143	34894143	1715	12	0.166667	2
Gm01	35668045	35669234	1189	DEL	Chr01	34930321	34930585	1718	925	0.000841043	0.00378788
Gm01	35678288	35678528	240	DEL	Chr01	34941133	34941146	1720	227	0.00833333	0.153846
Gm01	35709792	35710534	742	DEL	Chr01	34972457	34972457	1722	742	0.00269542	2
Gm01	35748545	35748579	34	DEL	Chr01	35010482	35010482	1724	34	0.0588235	2
Gm01	35841706	35841709	3	DEL	Chr01	35103415	35103415	1728	3	0.666667	2
Gm01	35937158	35937508	350	DEL	Chr01	35198601	35198601	1731	350	0.00571429	2
Gm01	36173881	36173982	101	DEL	Chr01	35438927	35438945	1739	83	0.029703	0.111111
Gm01	36360725	36369941	9216	DEL	Chr01	35625046	35625046	1744	9216	0.000217014	2
Gm01	36735249	36735350	101	DEL	Chr01	36004217	36004309	1752	9	0.019802	0.0217391
Gm01	37039171	37040031	860	DEL	Chr01	36308349	36308349	1755	860	0.00232558	2
Gm01	37045905	37049508	3603	DEL	Chr01	36314058	36314539	1756	3122	0.000555093	0.004158
Gm01	37055053	37056429	1376	DEL	Chr01	36320082	36320437	1757	1021	0.00145349	0.0056338
Gm01	37408007	37408108	101	DEL	Chr01	33534864	33534940	1770	25	0.019802	0.0263158
Gm01	37479010	37479111	101	DEL	Chr01	33463884	33463964	1771	21	0.019802	0.025
Gm01	37881646	37881747	101	DEL	Chr01	33060605	33060642	1777	64	0.019802	0.0540541
Gm01	37891222	37902649	11427	DEL	Chr01	33043688	33051131	1778	3984	0.000175024	0.792825
Gm01	37905186	37908011	2825	DEL	Chr01	33038469	33041152	1779	142	0.000707965	1.00112
Gm01	38322344	38324522	2178	DEL	Chr01	32621745	32623638	1790	285	0.000918274	0.00105652
Gm01	38527301	38527403	102	DEL	Chr01	32417697	32417790	1794	9	0.0196078	0.0215054
Gm01	38665397	38665537	140	DEL	Chr01	32279507	32279599	1797	48	0.0142857	0.0217391
Gm01	38736295	38736554	259	DEL	Chr01	32208538	32208757	1798	40	0.00772201	0.00913242
Gm01	38961769	38961951	182	DEL	Chr01	32030211	32030211	1808	182	0.00549451	2
Gm01	39233953	39234338	385	DEL	Chr01	36783952	36783952	1813	385	0.00519481	2
Gm01	39417162	39417300	138	DEL	Chr01	36968418	36968492	1821	64	0.0144928	0.027027
Gm01	39445907	39450663	4756	DEL	Chr01	37005600	37005600	1827	4756	0.000420521	2
Gm01	39636032	39636140	108	DEL	Chr01	37190660	37190660	1834	108	0.0185185	2
Gm01	39848445	39848550	105	DEL	Chr01	37402835	37402835	1837	105	0.0190476	2
Gm01	39994062	39999380	5318	DEL	Chr01	37550103	37554977	1840	444	0.000376081	0.842224
Gm01	40036039	40036142	103	DEL	Chr01	37605969	37605969	1844	103	0.0291262	4
Gm01	40093811	40094081	270	DEL	Chr01	37663452	37663464	1845	258	0.00740741	0.166667
Gm01	40539265	40539597	332	DEL	Chr01	38109585	38109585	1848	332	1.00904	2
Gm01	40663626	40663727	101	DEL	Chr01	38233732	38233774	1852	59	0.019802	0.047619
Gm01	40688467	40688602	135	DEL	Chr01	38258514	38258514	1853	135	0.0222222	3
Gm01	40802926	40803027	101	DEL	Chr01	38374127	38374197	1858	31	0.019802	0.0285714
Gm01	40823808	40824369	561	DEL	Chr01	38394976	38395139	1859	398	0.00356506	0.0122699
Gm01	40840212	40840219	7	DEL	Chr01	38410982	38410982	1861	7	0.285714	1
Gm01	40945503	40946310	807	DEL	Chr01	38523535	38524257	1865	85	0.00247831	0.00277008
Gm01	41478343	41481794	3451	DEL	Chr01	39059337	39059419	1875	3369	0.000579542	0.0243902
Gm01	41485838	41486188	350	DEL	Chr01	39063457	39063653	1876	154	0.00571429	0.0102041
Gm01	41588793	41591489	2696	DEL	Chr01	39166756	39166947	1879	2505	0.00074184	0.0104712
Gm01	42066121	42066572	451	DEL	Chr01	40185043	40185140	1894	354	0.00443459	0.0206186
Gm01	42176606	42176730	124	DEL	Chr01	40295644	40295667	1900	101	0.016129	6.34783
Gm01	42325562	42325663	101	DEL	Chr01	40452610	40452639	1903	72	0.019802	0.0689655
Gm01	42773526	42783527	10001	DEL	Chr01	40917317	40922511	1915	4807	0.00029997	0.00038506
Gm01	42880250	42880580	330	DEL	Chr01	41019222	41019493	1916	59	0.00606061	0.00738007
Gm01	42975142	42976166	1024	DEL	Chr01	41114047	41114285	1917	786	0.00195312	0.00840336
Gm01	43734483	43736352	1869	DEL	Chr01	41885135	41885490	1927	1514	0.00107009	2.01127
Gm01	43741067	43741169	102	DEL	Chr01	41890197	41890197	1929	102	0.0196078	3
Gm01	44006838	44008780	1942	DEL	Chr01	42155862	42155939	1932	1865	0.00102987	0.025974
Gm01	44357152	44359666	2514	DEL	Chr01	42508658	42508666	1944	2506	0.000795545	0.25
Gm01	44624597	44626640	2043	DEL	Chr01	42773742	42774681	1949	1104	0.00244738	0.00212993
Gm01	44674716	44674817	101	DEL	Chr01	42823302	42823302	1956	101	0.019802	2
Gm01	45093748	45093797	49	DEL	Chr01	43248046	43248046	1967	49	0.0408163	2
Gm01	45113712	45113855	143	DEL	Chr01	43267877	43267939	1968	81	0.013986	0.0322581
Gm01	45268908	45269009	101	DEL	Chr01	43423075	43423139	1970	37	0.019802	0.03125
Gm01	45364232	45365712	1480	DEL	Chr01	43522452	43522686	1973	1246	0.00135135	0.00854701
Gm01	45547109	45547210	101	DEL	Chr01	43705639	43705674	1975	66	0.019802	0.0571429
Gm01	45644466	45654467	10001	DEL	Chr01	43802941	43810315	1977	2627	0.00019998	0.000135612
Gm01	45663772	45667118	3346	DEL	Chr01	43822107	43822107	1979	3346	0.000597729	1
Gm01	45721005	45721676	671	DEL	Chr01	43878286	43878611	1985	346	0.00298063	0.00615385
Gm01	45877301	45877339	38	DEL	Chr01	44034762	44034762	1989	38	0.0526316	2
Gm01	45903129	45917160	14031	DEL	Chr01	44060766	44060867	1992	13930	0.000142542	0.019802
Gm01	45925767	45925802	35	DEL	Chr01	44069444	44069444	1994	35	0.0571429	2
Gm01	45997458	46001569	4111	DEL	Chr01	44143033	44143135	1997	4009	0.0004865	0.0196078
Gm01	46284938	46287822	2884	DEL	Chr01	44427357	44427357	2003	2884	0.000693481	2
Gm01	46448186	46450426	2240	DEL	Chr01	44588765	44590115	2007	890	0.000892857	0.00148148
Gm01	46682617	46688030	5413	DEL	Chr01	44822268	44822268	2011	5413	2.8099	2
Gm01	47004132	47004606	474	DEL	Chr01	45138920	45138920	2023	474	0.00421941	2
Gm01	47016575	47016576	1	DEL	Chr01	45158964	45158964	2028	1	1	2
Gm01	47149321	47149788	467	DEL	Chr01	45286568	45286633	2034	402	0.00428266	0.0307692
Gm01	47183651	47183957	306	DEL	Chr01	45320498	45320498	2036	306	0.00653595	2
Gm01	47259457	47262531	3074	DEL	Chr01	45411039	45411242	2040	2871	0.000650618	0.00985222
Gm01	47271899	47272234	335	DEL	Chr01	45420632	45420966	2042	1	0.00597015	0.00598802
Gm01	47299353	47299617	264	DEL	Chr01	45448793	45448793	2047	264	0.00757576	2
Gm01	47332064	47333549	1485	DEL	Chr01	45481091	45481091	2050	1485	0.000673401	1
Gm01	47415305	47415410	105	DEL	Chr01	45561523	45561526	2054	102	0.0190476	0.666667
Gm01	47449583	47454951	5368	DEL	Chr01	45595680	45595699	2056	5349	0.000186289	0.105263
Gm01	47538189	47539539	1350	DEL	Chr01	45684172	45684791	2064	731	0.0037037	2.00646
Gm01	47609067	47609114	47	DEL	Chr01	45754289	45754289	2066	47	0.0425532	2
Gm01	47777863	47777884	21	DEL	Chr01	45923143	45923143	2069	21	0.0952381	2
Gm01	47835508	47837281	1773	DEL	Chr01	45981369	45981590	2075	1552	0.00112803	0.00904977
Gm01	47880060	47881028	968	DEL	Chr01	46024816	46025177	2078	607	0.00206612	0.00554017
Gm01	47926501	47926532	31	DEL	Chr01	46070572	46070572	2080	31	0.0645161	2
Gm01	47932540	47932902	362	DEL	Chr01	46076605	46076857	2081	110	0.00552486	0.00793651
Gm01	48008846	48008874	28	DEL	Chr01	46153719	46153719	2086	28	0.0714286	2
Gm01	48049552	48050178	626	DEL	Chr01	46197936	46198540	2090	22	0.00319489	0.00331126
Gm01	48063204	48070088	6884	DEL	Chr01	46211602	46212428	2093	6058	0.854736	0.00242131
Gm01	48099085	48099773	688	DEL	Chr01	46241529	46241529	2099	688	0.00290698	2
Gm01	48159310	48160245	935	DEL	Chr01	46301221	46301221	2102	935	0.00213904	1
Gm01	48206073	48212743	6670	DEL	Chr01	46347394	46353417	2103	647	0.00029985	0.00033206
Gm01	48219961	48220822	861	DEL	Chr01	46360641	46361331	2104	171	0.00232288	0.00289855
Gm01	48248055	48254320	6265	DEL	Chr01	46388538	46388538	2106	6265	2.7502	2
Gm01	48274659	48286220	11561	DEL	Chr01	46408903	46408903	2108	11561	6.33457	2
Gm01	48294251	48300332	6081	DEL	Chr01	46416967	46416967	2110	6081	0.000328893	2
Gm01	48329109	48329298	189	DEL	Chr01	46445850	46445850	2112	189	0.010582	2
Gm01	48399297	48399462	165	DEL	Chr01	46515847	46515847	2114	165	0.0121212	2
Gm01	48642558	48642659	101	DEL	Chr01	46760291	46760291	2120	101	0.019802	2
Gm01	48699465	48699598	133	DEL	Chr01	46817090	46817107	2121	116	0.0150376	0.117647
Gm01	48733044	48734018	974	DEL	Chr01	46850559	46850753	2122	780	0.00205339	0.0103093
Gm01	48794560	48800024	5464	DEL	Chr01	46911317	46911317	2124	5464	1.50787	2
Gm01	48809335	48809472	137	DEL	Chr01	46920658	46920658	2125	137	0.0145985	2
Gm01	48926423	48926451	28	DEL	Chr01	47037599	47037599	2128	28	0.0714286	2
Gm01	48970919	48971047	128	DEL	Chr01	47082014	47082014	2130	128	0.015625	2
Gm01	48972828	48972880	52	DEL	Chr01	47083762	47083762	2132	52	0.0384615	2
Gm01	49083729	49083853	124	DEL	Chr01	47194551	47194587	2133	88	0.016129	0.0555556
Gm01	49180882	49183330	2448	DEL	Chr01	47291555	47291559	2136	2444	0.000816993	0.5
Gm01	49359483	49360070	587	DEL	Chr01	47478800	47478800	2140	587	0.00340716	2
Gm01	49385512	49385635	123	DEL	Chr01	47504449	47504564	2142	8	0.0162602	0.0173913
Gm01	49392141	49392242	101	DEL	Chr01	47511076	47511093	2143	84	0.019802	0.117647
Gm01	49506713	49506817	104	DEL	Chr01	47625523	47625525	2144	102	0.0192308	1
Gm01	49568005	49568112	107	DEL	Chr01	47686690	47686736	2145	61	0.0186916	0.0434783
Gm01	49709606	49710093	487	DEL	Chr01	47828220	47828305	2147	402	0.00410678	0.0235294
Gm01	49782559	49782666	107	DEL	Chr01	47900705	47900705	2149	107	0.0186916	2
Gm01	49913971	49914100	129	DEL	Chr01	48034902	48034934	2159	97	0.0155039	0.0625
Gm01	49954325	49954844	519	DEL	Chr01	48075310	48075310	2162	519	0.00385356	2
Gm01	50013303	50013350	47	DEL	Chr01	48133823	48133823	2164	47	0.0425532	2
Gm01	50019953	50020075	122	DEL	Chr01	48140422	48140422	2166	122	0.0163934	2
Gm01	50075018	50075040	22	DEL	Chr01	48195534	48195534	2171	22	0.0909091	2
Gm01	50123891	50124736	845	DEL	Chr01	48249482	48249482	2177	845	0.00236686	2
Gm01	50199089	50204356	5267	DEL	Chr01	48323966	48323966	2181	5267	0.000379723	2
Gm01	50205680	50206666	986	DEL	Chr01	48325286	48326171	2182	101	0.0020284	0.00225989
Gm01	50266416	50266582	166	DEL	Chr01	48387754	48387754	2185	166	0.0120482	2
Gm01	50299625	50300908	1283	DEL	Chr01	48426910	48427295	2188	898	0.00155885	0.00519481
Gm01	50854566	50859816	5250	DEL	Chr01	49006660	49006660	2209	5250	0.000380952	2
Gm01	50885534	50885635	101	DEL	Chr01	49038438	49038533	2213	6	0.019802	0.0210526
Gm01	50985161	50986594	1433	DEL	Chr01	49138426	49138557	2216	1302	0.00139567	0.0152672
Gm01	50991682	50992273	591	DEL	Chr01	49147679	49147679	2220	591	0.00169205	1
Gm01	51008407	51011932	3525	DEL	Chr01	49152029	49152029	2227	3525	0.000567376	2
Gm01	51036118	51036134	16	DEL	Chr01	49176237	49176237	2232	16	0.125	2
Gm01	51116198	51120537	4339	DEL	Chr01	49258341	49258342	2236	4338	0.0129062	3
Gm01	51382773	51382939	166	DEL	Chr01	49523564	49523566	2248	164	0.0120482	1
Gm01	51395124	51395264	140	DEL	Chr01	49535770	49535887	2249	23	0.0142857	0.017094
Gm01	51405612	51406047	435	DEL	Chr01	49546240	49546240	2251	435	0.0045977	2
Gm01	51486978	51486997	19	DEL	Chr01	49627186	49627186	2256	19	0.105263	2
Gm01	51513051	51514459	1408	DEL	Chr01	49653214	49653214	2258	1408	1.00284	3
Gm01	51564956	51564979	23	DEL	Chr01	49703748	49703748	2261	23	0.0869565	2
Gm01	51579783	51579804	21	DEL	Chr01	49718592	49718592	2263	21	0.0952381	2
Gm01	51668769	51668874	105	DEL	Chr01	49807466	49807466	2267	105	0	2
Gm01	51766235	51769402	3167	DEL	Chr01	49904667	49904667	2269	3167	0.000631512	2
Gm01	51895134	51895479	345	DEL	Chr01	50031289	50031632	2271	2	0.0057971	0.0058309
Gm01	52226817	52231572	4755	DEL	Chr01	50363277	50364044	2281	3988	0.00042061	0.00260756
Gm01	52310932	52311033	101	DEL	Chr01	50443409	50443428	2282	82	0.019802	0.105263
Gm01	52447646	52447751	105	DEL	Chr01	50580084	50580084	2284	105	0.0190476	2
Gm01	52539176	52539599	423	DEL	Chr01	50671939	50672207	2288	155	0.00472813	0.00746269
Gm01	52552356	52552458	102	DEL	Chr01	50684952	50684989	2289	65	0.0196078	0.243243
Gm01	52594532	52594710	178	DEL	Chr01	50727151	50727151	2293	178	0.011236	2
Gm01	52628260	52629155	895	DEL	Chr01	50760729	50761593	2295	31	0.00223464	0.00231481
Gm01	52636074	52636487	413	DEL	Chr01	50768507	50768507	2296	413	0.00484262	2
Gm01	52681615	52682126	511	DEL	Chr01	50813643	50813643	2299	511	0.00391389	2
Gm01	52710108	52710252	144	DEL	Chr01	50841560	50841560	2300	144	0.0138889	2
Gm01	52764587	52771757	7170	DEL	Chr01	50896070	50902588	2302	652	0.00027894	0.000306843
Gm01	52847138	52847222	84	DEL	Chr01	50977920	50977920	2305	84	0.0238095	2
Gm01	53052082	53052216	134	DEL	Chr01	51182751	51182863	2309	22	0.0149254	0.0178571
Gm01	53075511	53075621	110	DEL	Chr01	51206261	51206261	2310	110	0.0181818	2
Gm01	53258113	53258336	223	DEL	Chr01	51389030	51389186	2315	67	0.00896861	0.0128205
Gm01	53290315	53292961	2646	DEL	Chr01	51425913	51425913	2319	2646	0.000755858	2
Gm01	53370455	53371148	693	DEL	Chr01	51503674	51504109	2321	258	0.002886	0.0045977
Gm01	53377335	53377563	228	DEL	Chr01	51510304	51510510	2322	22	0.00877193	0.00970874
Gm01	53419473	53419576	103	DEL	Chr01	51552530	51552586	2324	47	0.0194175	0.0357143
Gm01	53611953	53612079	126	DEL	Chr01	51744905	51744951	2326	80	0.015873	0.0434783
Gm01	53770999	53771152	153	DEL	Chr01	51903926	51903926	2329	153	0.0130719	2
Gm01	53841105	53841250	145	DEL	Chr01	51973897	51973907	2330	135	0.0137931	0.2
Gm01	54240035	54241838	1803	DEL	Chr01	52372995	52373017	2338	1781	0.00110926	0.0909091
Gm01	54434453	54436097	1644	DEL	Chr01	52552342	52553542	2341	444	0.00121655	0.00166667
Gm01	54813188	54813291	103	DEL	Chr01	52931429	52931515	2345	17	0.0194175	0.0232558
Gm01	54872330	54874132	1802	DEL	Chr01	52990668	52991981	2348	489	0.00110988	0.00152323
Gm01	54883543	54883609	66	DEL	Chr01	53001390	53001390	2350	66	0.030303	2
Gm01	55698982	55700321	1339	DEL	Chr01	53821341	53821446	2362	1234	0.00149365	0.0190476
Gm01	56592431	56592757	326	DEL	Chr01	54722741	54722741	2371	326	0.00613497	3
Gm01	56627061	56630466	3405	DEL	Chr01	54757088	54757088	2375	3405	0.000587372	2
Gm01	56637503	56637517	14	DEL	Chr01	54764136	54764136	2377	14	0.142857	2
Gm01	56657984	56658046	62	DEL	Chr01	54785463	54785463	2382	62	0.0322581	2
Gm01	56687036	56687139	103	DEL	Chr01	54814382	54814382	2384	103	0.0194175	2
Gm01	56705880	56711875	5995	DEL	Chr01	54833101	54833101	2386	5995	1.98949	2
Gm01	56721570	56721862	292	DEL	Chr01	54842783	54842783	2388	292	0.00684932	2
Gm01	56738681	56739569	888	DEL	Chr01	54859689	54860095	2389	482	0.00225225	0.00492611
Gm01	56748193	56751401	3208	DEL	Chr01	54868728	54868856	2390	3080	0.000623441	0.015625
Gm01	56761484	56761987	503	DEL	Chr01	54878874	54878875	2391	502	0.00397614	2
Gm01	56803085	56804445	1360	DEL	Chr01	54920039	54920039	2393	1360	0.00147059	2
Gm01	11193	11193	0	INS	Chr01	12797	21625	3	8828	2	0
Gm01	280445	281106	661	INS	Chr01	286384	287140	12	756	0.00302572	0.0026455
Gm01	324226	324226	0	INS	Chr01	329595	331000	15	1405	2	0.00142349
Gm01	575206	575213	7	INS	Chr01	581126	582043	19	917	0.285714	0.00218103
Gm01	578771	578795	24	INS	Chr01	585595	588508	21	2913	0.0416667	0.000686577
Gm01	651361	651497	136	INS	Chr01	656923	657166	22	243	0.0147059	1.01235
Gm01	708640	708741	101	INS	Chr01	714074	714317	27	243	0.019802	0.00823045
Gm01	801772	802172	400	INS	Chr01	807348	808512	31	1164	0.005	0.00171821
Gm01	812480	813416	936	INS	Chr01	818831	819936	32	1105	0.00213675	0.00180995
Gm01	843754	843783	29	INS	Chr01	847993	848252	35	259	0.0689655	0.00772201
Gm01	934056	934303	247	INS	Chr01	934698	934999	39	301	0.00809717	0.00664452
Gm01	957483	957483	0	INS	Chr01	958086	958254	40	168	2	0.0119048
Gm01	990714	991160	446	INS	Chr01	989570	990115	42	545	0.0044843	0.00366972
Gm01	1014825	1014846	21	INS	Chr01	1013820	1013961	43	141	0.0952381	0.0141844
Gm01	1079895	1079895	0	INS	Chr01	1079082	1081556	45	2474	2	0.000808407
Gm01	1185095	1185198	103	INS	Chr01	1185828	1187507	48	1679	0.0194175	0.00119119
Gm01	1597638	1597739	101	INS	Chr01	1599860	1602286	64	2426	0.019802	0.000824402
Gm01	1653408	1654259	851	INS	Chr01	1657964	1659419	65	1455	0.00235018	0.00137457
Gm01	1688515	1688527	12	INS	Chr01	1693194	1693434	67	240	0.166667	0.00833333
Gm01	1715971	1716354	383	INS	Chr01	1720934	1721386	70	452	0.00522193	0.00442478
Gm01	1853442	1853568	126	INS	Chr01	1860101	1860850	73	749	0.015873	0.00267023
Gm01	1955754	1955857	103	INS	Chr01	1958119	1958300	77	181	0.0194175	0.0110497
Gm01	2070697	2073520	2823	INS	Chr01	2074577	2077613	80	3036	0.000354233	0.000658762
Gm01	2089831	2090748	917	INS	Chr01	2087984	2088975	86	991	0.00218103	0.00201816
Gm01	2152137	2152137	0	INS	Chr01	2150212	2150383	93	171	2	0.0116959
Gm01	2158477	2159641	1164	INS	Chr01	2156737	2158367	94	1630	0.00171821	0.00122699
Gm01	2170003	2170003	0	INS	Chr01	2167596	2167725	101	129	2	0.0155039
Gm01	2219970	2220071	101	INS	Chr01	2217658	2218816	102	1158	0.019802	0.00172712
Gm01	2257452	2257452	0	INS	Chr01	2252511	2252605	107	94	2	0.0212766
Gm01	2263407	2263407	0	INS	Chr01	2258558	2261902	109	3344	2	0.000598086
Gm01	2298465	2298566	101	INS	Chr01	2296982	2297130	110	148	0.019802	0.0135135
Gm01	2478400	2478527	127	INS	Chr01	2476215	2476565	116	350	0.015748	0.00571429
Gm01	2519803	2519904	101	INS	Chr01	2516380	2516856	118	476	0.019802	0.00420168
Gm01	2609326	2609326	0	INS	Chr01	2596575	2597101	121	526	2	0.00380228
Gm01	2698585	2698585	0	INS	Chr01	2684653	2688326	125	3673	2	2.00082
Gm01	2721867	2723495	1628	INS	Chr01	2711676	2714091	126	2415	0.0012285	0.000828157
Gm01	2777952	2777952	0	INS	Chr01	2768294	2768384	131	90	2	0.0222222
Gm01	2792582	2792582	0	INS	Chr01	2783228	2784138	134	910	2	0.0021978
Gm01	2863983	2864581	598	INS	Chr01	2853147	2853854	139	707	0.00334448	0.00282885
Gm01	2871236	2871236	0	INS	Chr01	2860464	2860737	141	273	2	0.00732601
Gm01	2873058	2873961	903	INS	Chr01	2862557	2863984	142	1427	0.00221484	0.00140154
Gm01	2883062	2883062	0	INS	Chr01	2873029	2873242	143	213	2	0.00938967
Gm01	2982650	2982793	143	INS	Chr01	2971923	2972080	148	157	0.013986	0.0127389
Gm01	2990159	2990159	0	INS	Chr01	2979445	2980224	149	779	2	0.00256739
Gm01	3031437	3032169	732	INS	Chr01	3021504	3022314	150	810	0.00273224	0.00246914
Gm01	3155114	3155114	0	INS	Chr01	3145253	3145352	158	99	2	0.020202
Gm01	3297298	3297298	0	INS	Chr01	3286634	3286787	164	153	2	0.0130719
Gm01	3309329	3310398	1069	INS	Chr01	3297637	3298729	166	1092	0.00187091	0.0018315
Gm01	3398100	3399065	965	INS	Chr01	3386323	3387414	172	1091	0.00207254	0.00183318
Gm01	3437984	3438009	25	INS	Chr01	3426354	3429392	173	3038	0.08	0.000658328
Gm01	3464662	3472349	7687	INS	Chr01	3455550	3463348	176	7798	0.00026018	0.000256476
Gm01	3523509	3523531	22	INS	Chr01	3505294	3506781	181	1487	0.0909091	0.00134499
Gm01	3556427	3556566	139	INS	Chr01	3539357	3539542	184	185	0.0143885	0.0108108
Gm01	3581731	3582347	616	INS	Chr01	3564277	3565854	187	1577	0.00162338	0.00126823
Gm01	3744064	3745084	1020	INS	Chr01	3714896	3716330	197	1434	0.00196078	0.0013947
Gm01	3794715	3794715	0	INS	Chr01	3760047	3760220	203	173	2	0.0115607
Gm01	3802605	3802605	0	INS	Chr01	3768116	3768724	205	608	2	0.00328947
Gm01	3817865	3818515	650	INS	Chr01	3783962	3784771	206	809	0.00307692	0.00247219
Gm01	3867056	3867056	0	INS	Chr01	3821872	3822143	211	271	2	0.00738007
Gm01	3882081	3882083	2	INS	Chr01	3837335	3837678	212	343	1	0.0058309
Gm01	3889339	3890431	1092	INS	Chr01	3844916	3846630	213	1714	0.0018315	0.00116686
Gm01	3899023	3899023	0	INS	Chr01	3855275	3857215	216	1940	1	0.000515464
Gm01	4043869	4043881	12	INS	Chr01	3997112	3998345	222	1233	0.166667	0.00162206
Gm01	4121326	4121326	0	INS	Chr01	4073748	4073872	225	124	2	0.016129
Gm01	4132708	4132810	102	INS	Chr01	4085243	4085519	226	276	0.0196078	0.00724638
Gm01	4135275	4135275	0	INS	Chr01	4087978	4088946	228	968	1	0.00206612
Gm01	4339065	4339065	0	INS	Chr01	4292446	4292572	231	126	2	0.015873
Gm01	4447066	4447246	180	INS	Chr01	4400593	4404878	233	4285	0.0111111	0.000466744
Gm01	4462395	4462395	0	INS	Chr01	4419989	4420178	235	189	2	0.010582
Gm01	4464312	4465534	1222	INS	Chr01	4422091	4423427	236	1336	0.00163666	0.00149701
Gm01	4521772	4521772	0	INS	Chr01	4478950	4480392	239	1442	2	0.00138696
Gm01	4608784	4608784	0	INS	Chr01	4567308	4567479	243	171	2	0.0116959
Gm01	4610752	4610752	0	INS	Chr01	4569463	4571258	245	1795	2	0.00111421
Gm01	4695155	4695311	156	INS	Chr01	4654865	4655102	248	237	0.0128205	0.00843882
Gm01	4699882	4699995	113	INS	Chr01	4659645	4659990	249	345	0.0176991	0.0057971
Gm01	4834644	4834748	104	INS	Chr01	4793758	4793887	254	129	0.0192308	0.0155039
Gm01	4836519	4836520	1	INS	Chr01	4795660	4795776	255	116	2	0.0172414
Gm01	4931587	4931974	387	INS	Chr01	4890878	4891267	257	389	0.00516796	0.00514139
Gm01	4982632	4982632	0	INS	Chr01	4941614	4941683	260	69	2	0.0289855
Gm01	5017212	5017313	101	INS	Chr01	4976305	4976505	261	200	0.019802	0.01
Gm01	5053759	5054136	377	INS	Chr01	5013038	5013472	262	434	0.00530504	0.00460829
Gm01	5086718	5087591	873	INS	Chr01	5044249	5045284	265	1035	0.00229095	0.00193237
Gm01	5106843	5106843	0	INS	Chr01	5064532	5064802	267	270	2	0.00740741
Gm01	5170961	5170961	0	INS	Chr01	5128974	5132621	271	3647	3	1.00082
Gm01	5316799	5317114	315	INS	Chr01	5277313	5277713	273	400	0.00634921	0.005
Gm01	5524992	5524992	0	INS	Chr01	5483908	5491004	281	7096	1	0.000281849
Gm01	5549068	5549164	96	INS	Chr01	5511987	5512259	283	272	0.0208333	0.00735294
Gm01	5568526	5568627	101	INS	Chr01	5531680	5531935	284	255	0.019802	0.00784314
Gm01	5575200	5582039	6839	INS	Chr01	5538498	5545531	285	7033	0.00029244	0.000284374
Gm01	5709381	5709486	105	INS	Chr01	5672866	5673089	289	223	0.0190476	0.00896861
Gm01	6027108	6027321	213	INS	Chr01	5989323	5989730	296	407	0.00469484	0.002457
Gm01	6058371	6058472	101	INS	Chr01	6020752	6020980	299	228	0.019802	0.00877193
Gm01	6236540	6237255	715	INS	Chr01	6199074	6200223	301	1149	0.0041958	0.00261097
Gm01	6324998	6327763	2765	INS	Chr01	6288235	6292184	305	3949	0.000723327	0.000506457
Gm01	6352525	6352629	104	INS	Chr01	6316949	6317138	306	189	0.0288462	0.015873
Gm01	6537535	6537636	101	INS	Chr01	6501816	6502179	308	363	0.019802	0.00550964
Gm01	6609149	6609149	0	INS	Chr01	6573721	6574060	310	339	2	0.00589971
Gm01	6646721	6646721	0	INS	Chr01	6611859	6612147	312	288	2	0.00694444
Gm01	6658012	6658116	104	INS	Chr01	6623482	6625543	313	2061	0.0192308	0.000970403
Gm01	6878713	6878713	0	INS	Chr01	6846111	6846176	318	65	2	0.0307692
Gm01	6889821	6889821	0	INS	Chr01	6857268	6864145	320	6877	2	0.000290824
Gm01	7086829	7086930	101	INS	Chr01	7051478	7052059	328	581	0.019802	0.00344234
Gm01	7093747	7093868	121	INS	Chr01	7058874	7059056	329	182	0.0165289	0.010989
Gm01	7172168	7172269	101	INS	Chr01	7137391	7137554	331	163	0.019802	0.0122699
Gm01	7299963	7300065	102	INS	Chr01	7262275	7262502	333	227	0.0196078	0.00881057
Gm01	7524915	7525052	137	INS	Chr01	7487436	7488139	336	703	0.0145985	0.00142248
Gm01	7641386	7641487	101	INS	Chr01	7606526	7606725	337	199	0.019802	0.0100503
Gm01	7693667	7693768	101	INS	Chr01	7658882	7659729	339	847	0.019802	0.00236128
Gm01	7695903	7696004	101	INS	Chr01	7661865	7662304	340	439	0.019802	0.00455581
Gm01	7771903	7772004	101	INS	Chr01	7738197	7738460	341	263	0.019802	0.00760456
Gm01	8181043	8181043	0	INS	Chr01	8139327	8140041	345	714	2	0.00280112
Gm01	8184205	8184205	0	INS	Chr01	8143210	8148409	346	5199	2	0.758223
Gm01	8404413	8404515	102	INS	Chr01	8366800	8367134	348	334	0.0196078	0.00598802
Gm01	8418359	8418488	129	INS	Chr01	8380909	8381344	350	435	0.0155039	0.0045977
Gm01	8690240	8690240	0	INS	Chr01	8656077	8656315	357	238	2	0.00840336
Gm01	8726104	8726242	138	INS	Chr01	8692187	8693288	358	1101	0.0144928	0.00181653
Gm01	8905454	8905835	381	INS	Chr01	8872903	8873331	365	428	0.00524934	0.0046729
Gm01	8990140	8991030	890	INS	Chr01	8957680	8958759	367	1079	0.00224719	0.653383
Gm01	9113726	9113830	104	INS	Chr01	9079887	9080489	371	602	0.0192308	0.00332226
Gm01	9172456	9172456	0	INS	Chr01	9137148	9137227	378	79	2	0.0253165
Gm01	9206971	9207490	519	INS	Chr01	9172525	9173100	381	575	0.00385356	0.00347826
Gm01	9282952	9282953	1	INS	Chr01	9248549	9248730	382	181	2	0.0110497
Gm01	9288541	9288541	0	INS	Chr01	9255216	9256195	385	979	2	0.00102145
Gm01	9497125	9497226	101	INS	Chr01	9465737	9465912	390	175	0.019802	0.0114286
Gm01	9676192	9676452	260	INS	Chr01	9643966	9644370	394	404	0.00769231	0.0049505
Gm01	9775531	9775532	1	INS	Chr01	9742604	9743185	396	581	2	0.00344234
Gm01	9931758	9931758	0	INS	Chr01	9899347	9902107	403	2760	2	0.000724638
Gm01	10319097	10319204	107	INS	Chr01	10301906	10302282	417	376	0.0186916	0.00531915
Gm01	10542141	10542636	495	INS	Chr01	10522114	10528072	428	5958	0.0020202	0.728936
Gm01	10729976	10730104	128	INS	Chr01	10720107	10720449	437	342	0.015625	0.00584795
Gm01	10815670	10815771	101	INS	Chr01	10808780	10811532	442	2752	0.019802	0.000726744
Gm01	10825866	10825967	101	INS	Chr01	10816171	10816785	443	614	0.019802	0.00325733
Gm01	10834794	10834794	0	INS	Chr01	10825618	10825923	445	305	2	0.00655738
Gm01	10847623	10847623	0	INS	Chr01	10838899	10839474	447	575	2	0.00347826
Gm01	10981029	10981029	0	INS	Chr01	10930130	10933682	456	3552	2	0.000563063
Gm01	11076362	11076483	121	INS	Chr01	11029789	11029956	461	167	0.0165289	0.011976
Gm01	11103310	11103310	0	INS	Chr01	11056742	11058690	463	1948	2	0.00102669
Gm01	11345534	11345881	347	INS	Chr01	11292743	11297824	474	5081	0.00576369	0.000393623
Gm01	11356715	11356816	101	INS	Chr01	11308611	11308796	477	185	0.019802	0.0108108
Gm01	11813953	11813953	0	INS	Chr01	11761786	11761882	483	96	2	0.0208333
Gm01	11890566	11891128	562	INS	Chr01	11818638	11819327	486	689	0.00355872	0.00290276
Gm01	11910983	11910983	0	INS	Chr01	11839212	11840114	488	902	2	0.00221729
Gm01	11916878	11916878	0	INS	Chr01	11846074	11850066	490	3992	2	0.000501002
Gm01	11922036	11922036	0	INS	Chr01	11855237	11856989	492	1752	2	0.00114155
Gm01	11929271	11929271	0	INS	Chr01	11864436	11868075	494	3639	2	0.000549602
Gm01	11957931	11957931	0	INS	Chr01	11898399	11903327	497	4928	1	1.32488
Gm01	11981570	11981902	332	INS	Chr01	11916447	11923728	501	7281	0.0060241	0.000137344
Gm01	12033726	12034459	733	INS	Chr01	11976534	11977525	502	991	0.00272851	0.00201816
Gm01	12095293	12095293	0	INS	Chr01	12038231	12038282	512	51	2	0.0196078
Gm01	12145405	12145414	9	INS	Chr01	12088879	12089895	521	1016	0.222222	0.0019685
Gm01	12181096	12181137	41	INS	Chr01	12100092	12100803	524	711	0.0487805	0.00281294
Gm01	12335543	12335547	4	INS	Chr01	12208428	12208662	537	234	0.5	0.00854701
Gm01	12337145	12337304	159	INS	Chr01	12210259	12210445	538	186	0.0125786	0.0107527
Gm01	12363239	12363239	0	INS	Chr01	12236380	12239036	540	2656	2	0.000753012
Gm01	12398504	12398504	0	INS	Chr01	12274326	12274925	542	599	2	0.0033389
Gm01	12462324	12462324	0	INS	Chr01	12337650	12358426	548	20776	2	9.62649e-05
Gm01	12470726	12470726	0	INS	Chr01	12366833	12376596	550	9763	2	3.29386
Gm01	12556987	12556987	0	INS	Chr01	12462541	12462658	553	117	2	0.017094
Gm01	12569675	12569675	0	INS	Chr01	12476006	12477417	557	1411	2	0.00141743
Gm01	12581948	12582467	519	INS	Chr01	12489693	12490931	558	1238	0.00385356	0.00161551
Gm01	12897051	12897054	3	INS	Chr01	12798155	12798292	578	137	0.666667	0.0145985
Gm01	12974268	12974268	0	INS	Chr01	12875338	12875716	582	378	2	0.00529101
Gm01	12984386	12991023	6637	INS	Chr01	12885843	12893028	583	7185	0.171764	0.000278358
Gm01	13027766	13027766	0	INS	Chr01	12928834	12928967	587	133	2	0.0150376
Gm01	13098737	13099237	500	INS	Chr01	12999456	13002460	590	3004	0.004	0.000665779
Gm01	13170345	13170345	0	INS	Chr01	13073560	13074185	592	625	2	0.0032
Gm01	13217386	13217489	103	INS	Chr01	13121720	13121844	596	124	0.0194175	0.016129
Gm01	13223111	13223111	0	INS	Chr01	13127478	13133702	598	6224	2	4.99004
Gm01	13415538	13415538	0	INS	Chr01	13326602	13339319	603	12717	2	0.00015727
Gm01	13482258	13482258	0	INS	Chr01	13407822	13412544	606	4722	2	0.000423549
Gm01	13769478	13769952	474	INS	Chr01	16548460	16559032	609	10572	0.00421941	0.000189179
Gm01	13844999	13844999	0	INS	Chr01	16633902	16643180	613	9278	2	0.652619
Gm01	13919995	13921019	1024	INS	Chr01	16717223	16736333	621	19110	0.000976562	0.000156986
Gm01	14041609	14041612	3	INS	Chr01	16458791	16459887	624	1096	0.666667	1.00274
Gm01	14080663	14080663	0	INS	Chr01	16418058	16420311	629	2253	0	0.00133156
Gm01	14144510	14144510	0	INS	Chr01	16359559	16360560	633	1001	0	0.001998
Gm01	14180898	14180898	0	INS	Chr01	16322986	16323125	637	139	0	0.0143885
Gm01	14239445	14239605	160	INS	Chr01	16259836	16264393	641	4557	0.00625	0.000438885
Gm01	14258908	14258908	0	INS	Chr01	16242830	16245332	646	2502	0	0.00039968
Gm01	14299230	14299230	0	INS	Chr01	16201019	16201148	647	129	2	0.0155039
Gm01	14310439	14310439	0	INS	Chr01	16188440	16189910	649	1470	0	0.00136054
Gm01	14319220	14321142	1922	INS	Chr01	16177495	16179653	650	2158	0.00104058	0.000926784
Gm01	14323043	14323043	0	INS	Chr01	16165749	16165917	653	168	0	0.00595238
Gm01	14323043	14323043	0	INS	Chr01	16166426	16175594	654	9168	0	0.000109075
Gm01	14382516	14388817	6301	INS	Chr01	16117535	16131670	665	14135	0.00031741	0.298125
Gm01	14411296	14411296	0	INS	Chr01	16092728	16094976	666	2248	2	0.00088968
Gm01	14452003	14452003	0	INS	Chr01	16066683	16067815	674	1132	0	0.00176678
Gm01	14466181	14466181	0	INS	Chr01	16040497	16052502	676	12005	0	4.76635
Gm01	14469762	14469762	0	INS	Chr01	16027423	16032045	679	4622	0	0.896582
Gm01	14469762	14469762	0	INS	Chr01	16033734	16036912	680	3178	0	0.000314663
Gm01	14555792	14555792	0	INS	Chr01	15945588	15952626	688	7038	0	0.000284172
Gm01	14557249	14557249	0	INS	Chr01	15933321	15943043	690	9722	0	10.5556
Gm01	14563693	14563693	0	INS	Chr01	15917051	15926870	692	9819	0	0.000203687
Gm01	14566020	14566166	146	INS	Chr01	15914544	15914705	693	161	0.0136986	0.0124224
Gm01	14605961	14608461	2500	INS	Chr01	15887281	15889865	696	2584	0.0008	0.000773994
Gm01	14817212	14817533	321	INS	Chr01	17328263	17330775	719	2512	0.00311526	0.000398089
Gm01	14829192	14829192	0	INS	Chr01	17328263	17330781	721	2518	1	0.000397141
Gm01	14846843	14846843	0	INS	Chr01	17360589	17361715	726	1126	2	0.0017762
Gm01	14905818	14905818	0	INS	Chr01	17418617	17424245	734	5628	2	3.70487
Gm01	14918847	14918847	0	INS	Chr01	17437723	17443394	737	5671	2	4.56004
Gm01	14936293	14936293	0	INS	Chr01	17459633	17459734	744	101	1	0.019802
Gm01	15420863	15420863	0	INS	Chr01	17079520	17087988	767	8468	0	1.00035
Gm01	15427652	15427654	2	INS	Chr01	17065140	17072777	768	7637	1	0.000261883
Gm01	15436555	15436555	0	INS	Chr01	17046527	17056238	770	9711	0	0.000205952
Gm01	15468304	15468304	0	INS	Chr01	17003595	17009131	774	5536	0	0.000180636
Gm01	15468304	15468304	0	INS	Chr01	17010119	17011946	775	1827	0	0
Gm01	15468304	15468304	0	INS	Chr01	17013968	17014782	776	814	0	0.0012285
Gm01	15493187	15493403	216	INS	Chr01	16978419	16978671	778	252	0.00462963	0.00793651
Gm01	15530794	15530794	0	INS	Chr01	16945757	16950736	780	4979	0	0.000401687
Gm01	15566601	15566601	0	INS	Chr01	16893445	16908863	782	15418	0	1.14113
Gm01	15567851	15567851	0	INS	Chr01	16882897	16892190	784	9293	0	0.859679
Gm01	15644078	15644078	0	INS	Chr01	16790194	16797980	794	7786	0	0.000256871
Gm01	16335901	16335902	1	INS	Chr01	15753668	15753989	813	321	2	0.00623053
Gm01	16355828	16355828	0	INS	Chr01	15720703	15732636	821	11933	0	0.203888
Gm01	16355828	16355828	0	INS	Chr01	15734556	15734859	822	303	0	0.00330033
Gm01	16361468	16361468	0	INS	Chr01	15703669	15713006	825	9337	0	1.4736
Gm01	16387724	16387724	0	INS	Chr01	15680788	15681962	828	1174	0	0.00170358
Gm01	16426613	16426613	0	INS	Chr01	15632332	15632771	844	439	0	0
Gm01	16426613	16426613	0	INS	Chr01	15642174	15643217	846	1043	0	0.000958773
Gm01	16429875	16429875	0	INS	Chr01	15618850	15619050	847	200	2	0.01
Gm01	16611843	16611843	0	INS	Chr01	15425176	15425238	861	62	0	0.0322581
Gm01	16666459	16666459	0	INS	Chr01	15368243	15368971	865	728	0	0
Gm01	16666459	16666459	0	INS	Chr01	15369689	15370024	866	335	0	0.00298507
Gm01	16678147	16679138	991	INS	Chr01	15336527	15339741	871	3214	0.00100908	0.000311139
Gm01	16699249	16699249	0	INS	Chr01	15332224	15332948	874	724	0	0.00276243
Gm01	16732280	16732310	30	INS	Chr01	15307244	15307686	878	442	0.0666667	0.00452489
Gm01	17317561	17317562	1	INS	Chr01	14719520	14719742	896	222	2	0.00900901
Gm01	17733726	17733726	0	INS	Chr01	14295235	14295366	904	131	0	0.0152672
Gm01	17739452	17739452	0	INS	Chr01	14288030	14289454	906	1424	0	0.00140449
Gm01	17812813	17812813	0	INS	Chr01	14214321	14214493	907	172	2	0.0116279
Gm01	17843334	17843334	0	INS	Chr01	14182875	14182946	911	71	0	0.028169
Gm01	17984669	17984770	101	INS	Chr01	14040840	14041034	912	194	0.019802	0.0103093
Gm01	18061604	18061605	1	INS	Chr01	13954941	13964407	915	9466	2	0.000211282
Gm01	18084366	18084366	0	INS	Chr01	13921377	13928853	920	7476	0	0.000267523
Gm01	18344986	18344986	0	INS	Chr01	13660022	13660084	928	62	0	0.0322581
Gm01	18412810	18412810	0	INS	Chr01	13589629	13591571	931	1942	0	0.00102987
Gm01	18960092	18960092	0	INS	Chr01	17815395	17815770	942	375	2	0.00533333
Gm01	19489525	19489525	0	INS	Chr01	18345112	18348731	960	3619	2	0.000552639
Gm01	20088670	20088670	0	INS	Chr01	18948991	18949210	967	219	2	0.00913242
Gm01	20254056	20255893	1837	INS	Chr01	19115053	19117173	975	2120	0.00108873	0.000943396
Gm01	20260077	20263049	2972	INS	Chr01	19121348	19124650	976	3302	0.000672948	0.000605694
Gm01	20725694	20726836	1142	INS	Chr01	19593802	19595213	985	1411	0.00175131	0.00141743
Gm01	20824939	20824939	0	INS	Chr01	19693254	19705632	987	12378	2	0.465099
Gm01	21813354	21813540	186	INS	Chr01	20469508	20469992	1069	484	0.0107527	0.00413223
Gm01	22263768	22264634	866	INS	Chr01	20014569	20015621	1085	1052	0.00230947	0.00190114
Gm01	22332289	22332396	107	INS	Chr01	19946776	19946909	1086	133	0.0186916	0.0150376
Gm01	22456909	22456909	0	INS	Chr01	19820884	19820968	1093	84	0	0.0238095
Gm01	22900357	22900357	0	INS	Chr01	20914181	20926026	1149	11845	2	1.39105
Gm01	23363813	23364250	437	INS	Chr01	20636707	20637633	1154	926	0.00457666	0.00215983
Gm01	23397571	23397672	101	INS	Chr01	20670952	20671134	1155	182	0.019802	0.010989
Gm01	23605822	23605822	0	INS	Chr01	21302294	21302536	1160	242	2	0.00826446
Gm01	23786906	23786906	0	INS	Chr01	21482589	21485525	1165	2936	1	0.000340599
Gm01	23830292	23830292	0	INS	Chr01	21524480	21531980	1169	7500	2	1.0004
Gm01	23948096	23948096	0	INS	Chr01	21650860	21651082	1175	222	2	0.00900901
Gm01	23975802	23975802	0	INS	Chr01	21678744	21680523	1178	1779	2	0.00112423
Gm01	24111583	24111742	159	INS	Chr01	21817382	21817919	1179	537	0.0125786	0.00372439
Gm01	24423745	24423745	0	INS	Chr01	22130089	22133657	1185	3568	2	0.000560538
Gm01	25000153	25000153	0	INS	Chr01	22710868	22710920	1194	52	2	0.0384615
Gm01	25066428	25066428	0	INS	Chr01	22777264	22777400	1198	136	2	0.0147059
Gm01	25254732	25254732	0	INS	Chr01	22973458	22973515	1202	57	2	0.0350877
Gm01	25699512	25700085	573	INS	Chr01	23419025	23420410	1207	1385	0.0034904	0.00144404
Gm01	25768025	25768133	108	INS	Chr01	23488356	23488701	1208	345	0.0185185	0.0057971
Gm01	25940926	25940926	0	INS	Chr01	23660497	23663945	1211	3448	2	0.000290023
Gm01	26014355	26014355	0	INS	Chr01	23738467	23740498	1213	2031	2	0.000984737
Gm01	26146062	26146066	4	INS	Chr01	23873159	23873292	1216	133	0.5	0.0150376
Gm01	26256843	26256947	104	INS	Chr01	23984014	23984470	1220	456	0.0192308	0.00438596
Gm01	26260142	26260243	101	INS	Chr01	23987665	23988288	1221	623	0.019802	0.00321027
Gm01	26376722	26376727	5	INS	Chr01	24104628	24104743	1223	115	0.4	0.0173913
Gm01	26428518	26428624	106	INS	Chr01	24156547	24158106	1226	1559	0.0188679	0.00128287
Gm01	26596774	26596882	108	INS	Chr01	24308775	24309378	1233	603	0.0185185	0.00331675
Gm01	26619172	26619274	102	INS	Chr01	24331649	24331754	1234	105	0.0196078	0.0190476
Gm01	26662820	26662820	0	INS	Chr01	24375254	24375804	1237	550	2	0.00363636
Gm01	26975608	26975848	240	INS	Chr01	24676389	24676631	1251	242	0.00833333	0.00826446
Gm01	27097417	27097417	0	INS	Chr01	24798101	24800381	1256	2280	2	0.000877193
Gm01	27260533	27260533	0	INS	Chr01	24962504	24962603	1262	99	2	0.020202
Gm01	27269417	27271199	1782	INS	Chr01	24971501	24973681	1263	2180	0.00112233	0.000917431
Gm01	27274277	27274277	0	INS	Chr01	24976756	24979507	1265	2751	2	0.000727008
Gm01	27278287	27278287	0	INS	Chr01	24983454	24983872	1267	418	2	0.00478469
Gm01	27306005	27306015	10	INS	Chr01	24992494	24992712	1270	218	0.2	0.00917431
Gm01	27314204	27314204	0	INS	Chr01	25000875	25010140	1272	9265	2	2.00022
Gm01	27333418	27333801	383	INS	Chr01	25029263	25030156	1274	893	0.00522193	0.00223964
Gm01	27560778	27560879	101	INS	Chr01	25257282	25257710	1280	428	0.019802	0.0046729
Gm01	27563896	27563896	0	INS	Chr01	25260706	25260802	1281	96	2	0.0208333
Gm01	27579732	27579732	0	INS	Chr01	25276667	25286510	1284	9843	1	0.579397
Gm01	27669677	27669677	0	INS	Chr01	25321888	25339761	1287	17873	2	0.397751
Gm01	27703543	27703543	0	INS	Chr01	25373738	25373803	1289	65	2	0.0307692
Gm01	27718146	27718146	0	INS	Chr01	25388419	25389144	1291	725	2	0.00275862
Gm01	27759022	27759022	0	INS	Chr01	25430217	25439581	1295	9364	2	6.51815
Gm01	27761721	27761721	0	INS	Chr01	25442285	25445916	1297	3631	2	0.000550812
Gm01	27839388	27839489	101	INS	Chr01	25517716	25517964	1304	248	0.019802	0.00806452
Gm01	27942244	27942248	4	INS	Chr01	25620723	25621187	1307	464	0.5	0.00431034
Gm01	28083868	28083868	0	INS	Chr01	25762588	25764084	1314	1496	2	0.0013369
Gm01	28215295	28215396	101	INS	Chr01	25892406	25892624	1324	218	0.019802	0.00917431
Gm01	28276667	28277519	852	INS	Chr01	25953889	25955518	1326	1629	0.00234742	0.00122775
Gm01	28361669	28361669	0	INS	Chr01	26039554	26040715	1328	1161	2	0.00172265
Gm01	28555682	28556069	387	INS	Chr01	26205890	26206415	1335	525	0.00516796	0.00380952
Gm01	28681366	28682382	1016	INS	Chr01	26330353	26333217	1338	2864	1.00689	2.20985
Gm01	28733166	28733166	0	INS	Chr01	26383919	26384337	1341	418	2	0.00478469
Gm01	28820753	28820757	4	INS	Chr01	26471803	26472696	1348	893	0.5	0.00223964
Gm01	28875722	28875722	0	INS	Chr01	26527341	26527881	1352	540	2	0.0037037
Gm01	28891584	28891584	0	INS	Chr01	26559921	26562217	1356	2296	1	0.00043554
Gm01	29082666	29082666	0	INS	Chr01	26693930	26694006	1367	76	2	0.0263158
Gm01	29151392	29151392	0	INS	Chr01	27383690	27386233	1376	2543	1	0.000393236
Gm01	29303650	29303651	1	INS	Chr01	27540755	27541915	1377	1160	2	0.00172414
Gm01	29567839	29567940	101	INS	Chr01	26828023	26828128	1385	105	0.019802	0.0190476
Gm01	30096411	30096411	0	INS	Chr01	28176186	28176496	1410	310	0	0.00645161
Gm01	30269765	30269765	0	INS	Chr01	27986198	27995067	1421	8869	0	1.53027
Gm01	30269765	30269765	0	INS	Chr01	27995911	27997539	1422	1628	0	0.611179
Gm01	30346706	30346706	0	INS	Chr01	27891787	27899122	1429	7335	0	0.000272665
Gm01	30398578	30398578	0	INS	Chr01	27838247	27838660	1431	413	0	0.00484262
Gm01	30574825	30574825	0	INS	Chr01	27652599	27661760	1440	9161	0	2.0298
Gm01	30675717	30675717	0	INS	Chr01	27032997	27040462	1447	7465	0	0.000267917
Gm01	30718996	30719026	30	INS	Chr01	26987548	26988582	1448	1034	0.0666667	0.00193424
Gm01	30836415	30836424	9	INS	Chr01	28441915	28443276	1454	1361	0.222222	0.00146951
Gm01	30894033	30894060	27	INS	Chr01	28500231	28500405	1457	174	0.0740741	0.0114943
Gm01	30912461	30912461	0	INS	Chr01	28518784	28521455	1459	2671	2	0.000748783
Gm01	30914047	30914337	290	INS	Chr01	28524267	28524591	1460	324	0.00689655	0.00617284
Gm01	30977070	30977201	131	INS	Chr01	28584232	28584398	1468	166	0.0152672	0.0120482
Gm01	30979499	30979600	101	INS	Chr01	28586690	28586871	1469	181	0.019802	0.0110497
Gm01	30982979	30982979	0	INS	Chr01	28590247	28596112	1471	5865	2	2.926
Gm01	31028888	31028889	1	INS	Chr01	28641312	28641402	1474	90	2	0.0222222
Gm01	31077482	31077716	234	INS	Chr01	28669472	28670616	1477	1144	1.01282	0.00174825
Gm01	31224412	31224517	105	INS	Chr01	28815721	28818119	1480	2398	0.0285714	1.80776
Gm01	31239702	31239702	0	INS	Chr01	28833311	28834307	1483	996	2	0.00100402
Gm01	31419165	31419165	0	INS	Chr01	29011699	29027514	1493	15815	6	6.32311e-05
Gm01	31622959	31622959	0	INS	Chr01	29222349	29222676	1505	327	2	0.00611621
Gm01	31654385	31654620	235	INS	Chr01	29253635	29253878	1508	243	0.00851064	0.00823045
Gm01	31740232	31740232	0	INS	Chr01	29340581	29341985	1513	1404	2	0.0014245
Gm01	31753094	31753094	0	INS	Chr01	29354849	29356011	1515	1162	2	0.00172117
Gm01	32121107	32121107	0	INS	Chr01	31638836	31643782	1533	4946	0	0.000404367
Gm01	32141760	32144199	2439	INS	Chr01	31612717	31618254	1540	5537	0.000410004	0.000361206
Gm01	32191199	32191199	0	INS	Chr01	31585069	31591585	1544	6516	0	6.76811
Gm01	32212057	32212057	0	INS	Chr01	31572603	31573051	1547	448	0	0.00446429
Gm01	32222470	32222470	0	INS	Chr01	31559800	31562211	1549	2411	1	0.000829531
Gm01	32356965	32356968	3	INS	Chr01	31427194	31427418	1553	224	0.333333	0.00892857
Gm01	32531028	32531085	57	INS	Chr01	31247907	31248053	1562	146	0.0350877	0.00684932
Gm01	32624634	32624634	0	INS	Chr01	31153554	31153866	1568	312	0	0.00641026
Gm01	32801617	32801617	0	INS	Chr01	30992939	30996774	1576	3835	0	0.919426
Gm01	32834252	32834252	0	INS	Chr01	30956955	30957034	1582	79	0	0.0253165
Gm01	33288866	33288967	101	INS	Chr01	30510974	30511190	1599	216	0.019802	0.00925926
Gm01	33381273	33381273	0	INS	Chr01	30414365	30418666	1601	4301	0	0.000465008
Gm01	33542996	33543000	4	INS	Chr01	30260622	30262537	1606	1915	0.5	0.00104439
Gm01	33806423	33806423	0	INS	Chr01	29996960	29997150	1607	190	2	0.0105263
Gm01	33856408	33856408	0	INS	Chr01	29946993	29947103	1609	110	2	0.0181818
Gm01	33921943	33922580	637	INS	Chr01	29880275	29881411	1610	1136	0.00313972	0.00176056
Gm01	33985186	33985186	0	INS	Chr01	29815425	29835969	1621	20544	0	0.937841
Gm01	34085753	34085854	101	INS	Chr01	29714662	29714824	1625	162	0.019802	0.0123457
Gm01	34115461	34115461	0	INS	Chr01	29684838	29685143	1629	305	0	0.00327869
Gm01	34205354	34205456	102	INS	Chr01	29593806	29594148	1633	342	0.0196078	0.00584795
Gm01	34311270	34311270	0	INS	Chr01	29486832	29493894	1638	7062	0	0.575333
Gm01	34380621	34380621	0	INS	Chr01	33701306	33701481	1644	175	2	0.0114286
Gm01	34492895	34492895	0	INS	Chr01	33817947	33821004	1651	3057	2	0.000327118
Gm01	34825322	34825322	0	INS	Chr01	34092152	34095916	1664	3764	2	0.00053135
Gm01	34908002	34908002	0	INS	Chr01	34170062	34173450	1673	3388	2	0.000295159
Gm01	34938788	34939802	1014	INS	Chr01	34213669	34222771	1675	9102	0.00197239	6.06735
Gm01	34947903	34947903	0	INS	Chr01	34230651	34235524	1679	4873	2	0.000410425
Gm01	35032730	35032836	106	INS	Chr01	34320707	34320872	1684	165	0.0188679	0.0121212
Gm01	35121756	35121756	0	INS	Chr01	34409761	34413322	1686	3561	2	0.00056164
Gm01	35173045	35173146	101	INS	Chr01	34464971	34465427	1687	456	0.019802	0.00438596
Gm01	35218749	35219712	963	INS	Chr01	34510779	34512686	1690	1907	0.00207684	0.00104877
Gm01	35288639	35288642	3	INS	Chr01	34576332	34576448	1697	116	0.666667	0.0172414
Gm01	35385026	35385026	0	INS	Chr01	34655802	34655957	1699	155	2	0.0129032
Gm01	35392848	35393770	922	INS	Chr01	34663778	34664779	1700	1001	0.0021692	0.001998
Gm01	35402447	35402447	0	INS	Chr01	34673416	34673765	1702	349	2	0.00573066
Gm01	35429558	35429559	1	INS	Chr01	34700735	34701686	1705	951	2	0.00210305
Gm01	35520287	35520287	0	INS	Chr01	34782518	34782577	1713	59	2	0.0338983
Gm01	35674510	35674518	8	INS	Chr01	34935824	34937398	1719	1574	0.25	0.00127065
Gm01	35794638	35794638	0	INS	Chr01	35056262	35056340	1726	78	2	0.025641
Gm01	35999551	35999684	133	INS	Chr01	35260608	35260768	1733	160	0.0150376	0.00625
Gm01	36023319	36023319	0	INS	Chr01	35287174	35287423	1735	249	2	0.00803213
Gm01	36066225	36067067	842	INS	Chr01	35330357	35331409	1736	1052	0.0023753	0.00190114
Gm01	36071984	36072119	135	INS	Chr01	35336337	35337099	1737	762	0.0148148	0.00262467
Gm01	36179132	36179800	668	INS	Chr01	35444174	35446191	1740	2017	0.00299401	0.000991572
Gm01	36373251	36373693	442	INS	Chr01	35628352	35628812	1745	460	0.00452489	0.00434783
Gm01	36439912	36439912	0	INS	Chr01	35694998	35695438	1747	440	1	0.00454545
Gm01	36543861	36543962	101	INS	Chr01	35799722	35812820	1750	13098	0.019802	0.000152695
Gm01	36711716	36711817	101	INS	Chr01	35980570	35980786	1751	216	0.019802	0.00925926
Gm01	36944998	36945278	280	INS	Chr01	36213950	36214474	1753	524	0.00714286	0.00381679
Gm01	37083984	37083988	4	INS	Chr01	36347991	36348086	1758	95	0.5	0.0210526
Gm01	37099562	37099562	0	INS	Chr01	36383396	36390733	1763	7337	2	0.880878
Gm01	37129425	37129425	0	INS	Chr01	36421848	36425425	1765	3577	2	0.000559128
Gm01	37285820	37285820	0	INS	Chr01	36583026	36583127	1768	101	2	0.019802
Gm01	37793180	37793425	245	INS	Chr01	33149310	33149772	1774	462	0.00816327	0.004329
Gm01	37821566	37821703	137	INS	Chr01	33121022	33121167	1775	145	0.0145985	0.0137931
Gm01	37878881	37878982	101	INS	Chr01	33063293	33063842	1776	549	0.019802	0.00364299
Gm01	37970783	37971763	980	INS	Chr01	32974276	32975526	1782	1250	0.00204082	0.0016
Gm01	38343691	38343691	0	INS	Chr01	32602164	32602585	1792	421	0	1.00713
Gm01	38345755	38346021	266	INS	Chr01	32599067	32599960	1793	893	0.0075188	0.00223964
Gm01	39238031	39238031	0	INS	Chr01	36787394	36787688	1815	294	2	0.00680272
Gm01	39289822	39289926	104	INS	Chr01	36839508	36839790	1816	282	0.0288462	0.0106383
Gm01	39304219	39304349	130	INS	Chr01	36854077	36854665	1817	588	0.0384615	4.0102
Gm01	39413879	39413879	0	INS	Chr01	36964640	36965116	1820	476	2	0.00420168
Gm01	39536108	39536108	0	INS	Chr01	37090948	37096278	1830	5330	1	0.000375235
Gm01	39730221	39730367	146	INS	Chr01	37284603	37284760	1835	157	0.0136986	0.0127389
Gm01	39856646	39857077	431	INS	Chr01	37410886	37413292	1838	2406	0.00464037	5.00291
Gm01	40024097	40024274	177	INS	Chr01	37579726	37582092	1841	2366	0.0451977	2.38419
Gm01	40028809	40031571	2762	INS	Chr01	37586628	37601497	1842	14869	0.964881	1.44468
Gm01	40206711	40206812	101	INS	Chr01	37776062	37776525	1846	463	0.019802	0.00431965
Gm01	40494041	40494432	391	INS	Chr01	38063747	38064704	1847	957	0.00511509	0.00208986
Gm01	40550076	40550076	0	INS	Chr01	38120115	38120179	1850	64	2	0.03125
Gm01	40660801	40661331	530	INS	Chr01	38230889	38231434	1851	545	0.00377358	0.00366972
Gm01	40721459	40721459	0	INS	Chr01	38291348	38291569	1855	221	2	0.00904977
Gm01	40749193	40749393	200	INS	Chr01	38319323	38319578	1856	255	0.01	0.00784314
Gm01	40801053	40801266	213	INS	Chr01	38371234	38372469	1857	1235	0.00938967	0.00161943
Gm01	40869834	40869834	0	INS	Chr01	38440811	38441625	1864	814	2	0.0012285
Gm01	40950197	40951372	1175	INS	Chr01	38528143	38529902	1866	1759	0.00170213	0.00113701
Gm01	40954720	40954720	0	INS	Chr01	38533257	38534231	1868	974	2	0.00205339
Gm01	41113697	41113801	104	INS	Chr01	38693178	38693305	1869	127	0.0192308	0.015748
Gm01	41133216	41133825	609	INS	Chr01	38712720	38714771	1870	2051	0.00328407	0.000975134
Gm01	41584435	41584536	101	INS	Chr01	39161942	39162499	1878	557	0.019802	0.00359066
Gm01	41755802	41765803	10001	INS	Chr01	39331245	39699876	1883	368631	0.00019998	1.10172
Gm01	41851071	41851172	101	INS	Chr01	39958627	39958749	1884	122	0.019802	0.0163934
Gm01	41921642	41922334	692	INS	Chr01	40029206	40029910	1887	704	0.00144509	0.00142045
Gm01	41933400	41933400	0	INS	Chr01	40042165	40042341	1892	176	2	0.0113636
Gm01	42024438	42034439	10001	INS	Chr01	40133405	40153360	1893	19955	0.00019998	0.326184
Gm01	42096198	42096198	0	INS	Chr01	40214785	40215096	1896	311	2	0.00643087
Gm01	42135151	42135266	115	INS	Chr01	40254026	40254917	1899	891	0.00869565	0.00224467
Gm01	42283225	42283225	0	INS	Chr01	40402165	40409117	1902	6952	2	0.000287687
Gm01	42483659	42483659	0	INS	Chr01	40610627	40610689	1905	62	2	0.0322581
Gm01	42489207	42489207	0	INS	Chr01	40616267	40616370	1907	103	2	0.0194175
Gm01	42492260	42492260	0	INS	Chr01	40619450	40619535	1909	85	2	0.0235294
Gm01	42602998	42602998	0	INS	Chr01	40730293	40737837	1911	7544	2	0.000265111
Gm01	42647525	42647668	143	INS	Chr01	40783556	40783704	1912	148	0.013986	0.0135135
Gm01	42750021	42750021	0	INS	Chr01	40886133	40893089	1914	6956	2	0.000287522
Gm01	43265568	43265568	0	INS	Chr01	41403860	41412356	1921	8496	10	3.94209
Gm01	43556045	43556045	0	INS	Chr01	41705213	41705895	1925	682	2	0.00293255
Gm01	43796792	43796951	159	INS	Chr01	41945680	41945844	1930	164	0.0188679	0.0182927
Gm01	43983612	43983612	0	INS	Chr01	42132482	42132638	1931	156	2	0.0128205
Gm01	44015284	44015284	0	INS	Chr01	42162444	42162898	1934	454	2	0.00440529
Gm01	44030835	44031456	621	INS	Chr01	42178954	42181163	1935	2209	0.00322061	0.000905387
Gm01	44101724	44102349	625	INS	Chr01	42251407	42252819	1936	1412	0.0032	0.00141643
Gm01	44232201	44232201	0	INS	Chr01	42382860	42383636	1940	776	2	0.00257732
Gm01	44331991	44332022	31	INS	Chr01	42483397	42483538	1943	141	0.0645161	0.0141844
Gm01	44364357	44365519	1162	INS	Chr01	42513355	42514601	1945	1246	0.00172117	0.00160514
Gm01	44433369	44433846	477	INS	Chr01	42582351	42582962	1947	611	0.00419287	0.00327332
Gm01	44622967	44623293	326	INS	Chr01	42772078	42772438	1948	360	0.00613497	0.00555556
Gm01	44636220	44636321	101	INS	Chr01	42784259	42784656	1950	397	0.019802	0.00503778
Gm01	44648746	44648746	0	INS	Chr01	42797081	42797182	1952	101	2	0.019802
Gm01	44661015	44661015	0	INS	Chr01	42809526	42809591	1954	65	2	0.0307692
Gm01	44884320	44884320	0	INS	Chr01	43032753	43032871	1958	118	2	0.0169492
Gm01	44912227	44912332	105	INS	Chr01	43060966	43061332	1959	366	0.0190476	0.00546448
Gm01	45041802	45041802	0	INS	Chr01	43190849	43191040	1963	191	2	0.0104712
Gm01	45080222	45080222	0	INS	Chr01	43229930	43233943	1965	4013	2	0.00024919
Gm01	45215952	45216533	581	INS	Chr01	43370004	43370703	1969	699	0.00344234	0.00286123
Gm01	45329570	45329570	0	INS	Chr01	43483701	43487442	1972	3741	2	0.000534616
Gm01	45398562	45398663	101	INS	Chr01	43555528	43557205	1974	1677	0.019802	0.00119261
Gm01	45723450	45723658	208	INS	Chr01	43880385	43880644	1986	259	0.00961538	0.00772201
Gm01	45871497	45871784	287	INS	Chr01	44028471	44029183	1987	712	0.00696864	0.00280899
Gm01	45888279	45888279	0	INS	Chr01	44045675	44045889	1991	214	2	0.00934579
Gm01	45990241	45990241	0	INS	Chr01	44133851	44135816	1996	1965	2	0.00101781
Gm01	46061235	46062274	1039	INS	Chr01	44202741	44203804	1998	1063	0.00192493	0.00188147
Gm01	46090817	46090930	113	INS	Chr01	44232343	44232908	1999	565	0.0176991	0.00353982
Gm01	46160976	46161562	586	INS	Chr01	44302972	44303979	2002	1007	0.00341297	0.0019861
Gm01	46305940	46305940	0	INS	Chr01	44445468	44445774	2004	306	2	0.00653595
Gm01	46356547	46356654	107	INS	Chr01	44496415	44496664	2006	249	0.0186916	0.00401606
Gm01	46457270	46457270	0	INS	Chr01	44596959	44597064	2009	105	2	0.0190476
Gm01	46780451	46780451	0	INS	Chr01	44915322	44915472	2017	150	2	0.0133333
Gm01	46867447	46867447	0	INS	Chr01	45002425	45002770	2019	345	1	0.0057971
Gm01	47007567	47007567	0	INS	Chr01	45141877	45148864	2025	6987	2	0.000286246
Gm01	47037637	47037637	0	INS	Chr01	45170822	45172306	2030	1484	2	0.00134771
Gm01	47087512	47087514	2	INS	Chr01	45224526	45224675	2031	149	1	0.0134228
Gm01	47189476	47190097	621	INS	Chr01	45326014	45326723	2037	709	0.00322061	0.00282087
Gm01	47265315	47265419	104	INS	Chr01	45414029	45414151	2041	122	0.0192308	0.0163934
Gm01	47281776	47281776	0	INS	Chr01	45430512	45431079	2044	567	2	0.00352734
Gm01	47294073	47294174	101	INS	Chr01	45443317	45443617	2045	300	0.019802	0.00666667
Gm01	47340551	47340785	234	INS	Chr01	45486671	45487045	2051	374	0.00854701	0.00534759
Gm01	47351568	47351669	101	INS	Chr01	45497816	45497946	2052	130	0.019802	0.0153846
Gm01	47481814	47481814	0	INS	Chr01	45621585	45626016	2058	4431	2	0.000451365
Gm01	47506188	47506188	0	INS	Chr01	45650807	45650876	2060	69	2	0.0289855
Gm01	47512320	47512320	0	INS	Chr01	45657016	45657092	2062	76	2	0.0263158
Gm01	47530076	47533892	3816	INS	Chr01	45674913	45679877	2063	4964	0.000786164	3.00101
Gm01	47660237	47660355	118	INS	Chr01	45805272	45805649	2067	377	0.0169492	0.00530504
Gm01	47825014	47825139	125	INS	Chr01	45970341	45970979	2073	638	0.008	0.0015674
Gm01	47827210	47828543	1333	INS	Chr01	45972966	45974414	2074	1448	0.00150038	0.00138122
Gm01	47856816	47856918	102	INS	Chr01	46001123	46001340	2076	217	0.0196078	0.00921659
Gm01	47862764	47862764	0	INS	Chr01	46007187	46007539	2077	352	2	0.00568182
Gm01	47945944	47945944	0	INS	Chr01	46089942	46090253	2082	311	2	0.00643087
Gm01	47955366	47955449	83	INS	Chr01	46099662	46100270	2083	608	0.0240964	0.00328947
Gm01	48005482	48005665	183	INS	Chr01	46150332	46150539	2084	207	0.010929	0.00966184
Gm01	48010190	48010190	0	INS	Chr01	46154918	46155265	2088	347	2	0.00576369
Gm01	48033470	48033884	414	INS	Chr01	46178491	46182208	2089	3717	0.00483092	0.000538068
Gm01	48097654	48097654	0	INS	Chr01	46240034	46240088	2097	54	2	0.037037
Gm01	48135512	48135618	106	INS	Chr01	46277240	46277469	2100	229	0.0188679	0.00873362
Gm01	48309858	48309858	0	INS	Chr01	46426483	46426579	2111	96	2	0.0208333
Gm01	48409250	48409351	101	INS	Chr01	46525632	46525824	2115	192	0.019802	0.0104167
Gm01	48412122	48412147	25	INS	Chr01	46528606	46528714	2116	108	0.08	0.0185185
Gm01	48565095	48565095	0	INS	Chr01	46681698	46682260	2118	562	2	0.00355872
Gm01	48900071	48900172	101	INS	Chr01	47011190	47011349	2126	159	0.029703	1.01887
Gm01	49346725	49348953	2228	INS	Chr01	47454824	47462304	2137	7480	0.000897666	0.661631
Gm01	49356346	49356955	609	INS	Chr01	47469686	47476267	2138	6581	0.00328407	0.000303905
Gm01	49382676	49382676	0	INS	Chr01	47501388	47501595	2141	207	2	0.00966184
Gm01	49815294	49816243	949	INS	Chr01	47933138	47934215	2150	1077	0.00210748	0.00185701
Gm01	49824714	49825914	1200	INS	Chr01	47942615	47943852	2151	1237	0.00166667	0.00161681
Gm01	49858518	49858636	118	INS	Chr01	47974922	47975051	2153	129	0.0169492	0.0155039
Gm01	49898222	49899962	1740	INS	Chr01	48014668	48018105	2154	3437	0.00114943	0.000581903
Gm01	49906083	49906083	0	INS	Chr01	48026980	48027418	2158	438	1	0.00228311
Gm01	49951462	49951462	0	INS	Chr01	48072286	48072386	2160	100	2	0.02
Gm01	50026394	50026495	101	INS	Chr01	48146851	48146957	2167	106	0.019802	0.0188679
Gm01	50050306	50050407	101	INS	Chr01	48170826	48170934	2168	108	0.019802	0.0185185
Gm01	50061815	50061916	101	INS	Chr01	48182319	48182429	2169	110	0.029703	0.681818
Gm01	50114993	50115094	101	INS	Chr01	48235558	48236091	2173	533	0.019802	0.00187617
Gm01	50134566	50134787	221	INS	Chr01	48259318	48259620	2178	302	0.00904977	0.00662252
Gm01	50164632	50164632	0	INS	Chr01	48289517	48289621	2179	104	2	0.0192308
Gm01	50223007	50223008	1	INS	Chr01	48342419	48344339	2183	1920	2	0.00104167
Gm01	50286930	50286930	0	INS	Chr01	48407987	48414236	2187	6249	2	1
Gm01	50303935	50305236	1301	INS	Chr01	48430307	48431887	2189	1580	0.00153728	0.00126582
Gm01	50308681	50309164	483	INS	Chr01	48435324	48435903	2190	579	0.00414079	0.00345423
Gm01	50324147	50324250	103	INS	Chr01	48462548	48462736	2193	188	0.0194175	0.0106383
Gm01	50325589	50325589	0	INS	Chr01	48464067	48465477	2195	1410	2	0.00141844
Gm01	50349998	50353438	3440	INS	Chr01	48489802	48495584	2196	5782	0.000581395	0.000345901
Gm01	50391473	50391473	0	INS	Chr01	48535313	48537184	2200	1871	2	0.00106895
Gm01	50424438	50424438	0	INS	Chr01	48570020	48575995	2202	5975	2	1.99649
Gm01	50454371	50454472	101	INS	Chr01	48606030	48606139	2203	109	0.019802	0.0183486
Gm01	50530971	50531072	101	INS	Chr01	48682661	48682853	2204	192	0.019802	0.0104167
Gm01	50812528	50812629	101	INS	Chr01	48964353	48964713	2207	360	0.019802	0.00555556
Gm01	50876569	50876569	0	INS	Chr01	49023451	49028669	2211	5218	2	0.000383289
Gm01	50882456	50882649	193	INS	Chr01	49034583	49035548	2212	965	0.0103627	0.00207254
Gm01	50923041	50923051	10	INS	Chr01	49075994	49076155	2214	161	0.2	0.0124224
Gm01	51014914	51014915	1	INS	Chr01	49154992	49155104	2228	112	2	0.0178571
Gm01	51080815	51080815	0	INS	Chr01	49220864	49222826	2234	1962	2	0.00101937
Gm01	51189634	51189638	4	INS	Chr01	49327630	49327771	2237	141	0.5	0.0141844
Gm01	51203818	51203822	4	INS	Chr01	49341990	49342152	2240	162	0.5	0.0123457
Gm01	51210903	51211301	398	INS	Chr01	49349218	49349688	2241	470	0.00502513	0.00425532
Gm01	51213038	51213069	31	INS	Chr01	49351423	49351886	2243	463	0.0322581	0.00431965
Gm01	51303566	51303675	109	INS	Chr01	49442054	49444804	2245	2750	0.0183486	0.000727273
Gm01	51315906	51316043	137	INS	Chr01	49457043	49457337	2247	294	0.0145985	0.0102041
Gm01	51409501	51409819	318	INS	Chr01	49549639	49550037	2252	398	0.00628931	0.00502513
Gm01	51557272	51557898	626	INS	Chr01	49695989	49696685	2259	696	0.00319489	0.00287356
Gm01	51874732	51874833	101	INS	Chr01	50009972	50011023	2270	1051	0.019802	2.00381
Gm01	52099513	52099513	0	INS	Chr01	50235694	50235750	2277	56	2	0.0357143
Gm01	52113243	52113348	105	INS	Chr01	50249503	50249766	2278	263	0.0190476	0.00760456
Gm01	52218101	52218202	101	INS	Chr01	50354518	50354652	2279	134	0.019802	0.0149254
Gm01	52220302	52220468	166	INS	Chr01	50356752	50356926	2280	174	0.0120482	0.0114943
Gm01	52491893	52491994	101	INS	Chr01	50624164	50624847	2285	683	0.019802	0.00292826
Gm01	52614224	52614325	101	INS	Chr01	50746668	50746830	2294	162	0.029703	1.01852
Gm01	52662729	52663447	718	INS	Chr01	50794710	50795486	2297	776	0.00278552	0.00257732
Gm01	52715217	52716541	1324	INS	Chr01	50846503	50848059	2301	1556	0.00151057	0.00128535
Gm01	52775871	52776454	583	INS	Chr01	50906692	50907291	2303	599	0.00343053	0.0033389
Gm01	52913212	52913320	108	INS	Chr01	51043793	51043904	2307	111	0.0277778	0.531532
Gm01	53237657	53237791	134	INS	Chr01	51368256	51368537	2313	281	0.0149254	0.00711744
Gm01	53250899	53251004	105	INS	Chr01	51381624	51381919	2314	295	0.0190476	0.00677966
Gm01	53280474	53280474	0	INS	Chr01	51411349	51415756	2317	4407	2	2.00091
Gm01	53365251	53366683	1432	INS	Chr01	51498207	51499904	2320	1697	0.00139665	0.00117855
Gm01	53413057	53413158	101	INS	Chr01	51546007	51546216	2323	209	0.019802	0.00956938
Gm01	53767866	53767870	4	INS	Chr01	51900619	51900825	2327	206	0.5	0.00970874
Gm01	53852872	53852969	97	INS	Chr01	51985528	51985634	2331	106	0.0206186	0.0188679
Gm01	53982029	53982029	0	INS	Chr01	52114686	52114759	2333	73	2	0.0273973
Gm01	54320026	54333391	13365	INS	Chr01	52451202	52465309	2340	14107	0.251927	1.72546
Gm01	54463401	54463401	0	INS	Chr01	52580822	52581257	2343	435	2	0.0045977
Gm01	54766434	54766535	101	INS	Chr01	52884240	52884767	2344	527	0.019802	0.00379507
Gm01	54817734	54817835	101	INS	Chr01	52935957	52936136	2346	179	0.019802	0.0111732
Gm01	54831102	54831203	101	INS	Chr01	52949397	52949550	2347	153	0.019802	0.0130719
Gm01	54891794	54891969	175	INS	Chr01	53009526	53009708	2351	182	0.0171429	1.01648
Gm01	54968917	54969021	104	INS	Chr01	53086660	53086951	2352	291	0.0192308	0.00687285
Gm01	55016770	55016770	0	INS	Chr01	53134704	53136470	2354	1766	2	0.0011325
Gm01	55029483	55029483	0	INS	Chr01	53149688	53149756	2356	68	2	0.0294118
Gm01	55243489	55243626	137	INS	Chr01	53363745	53363942	2357	197	0.0145985	0.0101523
Gm01	55369891	55369892	1	INS	Chr01	53490196	53490463	2358	267	2	0.00749064
Gm01	55382329	55382329	0	INS	Chr01	53502898	53503963	2359	1065	2	0.00187793
Gm01	55690988	55691104	116	INS	Chr01	53812850	53813462	2361	612	0.0172414	0.00326797
Gm01	55822878	55822979	101	INS	Chr01	53944022	53944462	2363	440	0.019802	0.00454545
Gm01	55922931	55923032	101	INS	Chr01	54044411	54045614	2364	1203	0.019802	0.00166251
Gm01	56512157	56512157	0	INS	Chr01	54640453	54642108	2368	1655	2	0.00060423
Gm01	56549470	56549572	102	INS	Chr01	54679765	54679875	2369	110	0.0196078	0.0181818
Gm01	56639765	56639765	0	INS	Chr01	54765951	54766185	2379	234	2	0.00854701
Gm01	56655152	56655156	4	INS	Chr01	54781551	54782638	2380	1087	0.5	0.00183993
Gm02	220865	225718	4853	DEL	Chr02	220642	220642	2395	4853	1.00062	2
Gm02	231896	232195	299	DEL	Chr02	226939	226939	2398	299	0.00668896	2
Gm02	254522	254758	236	DEL	Chr02	249270	249270	2401	236	0.00423729	2
Gm02	275881	276445	564	DEL	Chr02	265588	265871	2402	281	0.0035461	0.00706714
Gm02	302061	305243	3182	DEL	Chr02	291478	291478	2405	3182	0.000628536	2
Gm02	309324	309737	413	DEL	Chr02	295546	295546	2406	413	0.00484262	2
Gm02	312535	312638	103	DEL	Chr02	298311	298311	2407	103	0.0194175	2
Gm02	317593	317627	34	DEL	Chr02	303280	303280	2409	34	0.0588235	2
Gm02	337709	337740	31	DEL	Chr02	323379	323379	2411	31	0.0645161	2
Gm02	344709	346271	1562	DEL	Chr02	330323	330323	2413	1562	0.00128041	2
Gm02	360909	361894	985	DEL	Chr02	344961	344961	2416	985	0.00101523	2
Gm02	385296	386576	1280	DEL	Chr02	367424	367424	2420	1280	0.0015625	2
Gm02	414929	414952	23	DEL	Chr02	395733	395733	2422	23	1.13043	2
Gm02	421065	421088	23	DEL	Chr02	401891	401891	2426	23	0.0434783	2
Gm02	502598	503237	639	DEL	Chr02	485176	485176	2434	639	0.00312989	2
Gm02	525079	525202	123	DEL	Chr02	506960	506960	2435	123	0.0162602	2
Gm02	648448	648623	175	DEL	Chr02	631870	631872	2438	173	0.0114286	1
Gm02	1213680	1214795	1115	DEL	Chr02	1206319	1206356	2451	1078	0.00179372	0.0540541
Gm02	1273199	1273300	101	DEL	Chr02	1264875	1264897	2453	79	0.019802	0.0909091
Gm02	1340086	1340339	253	DEL	Chr02	1331851	1331915	2457	189	0.00790514	0.03125
Gm02	1344764	1354784	10020	DEL	Chr02	1336335	1338249	2458	8106	0.000199601	0.00104493
Gm02	1379187	1379288	101	DEL	Chr02	1362706	1362707	2459	100	0.019802	2
Gm02	1384687	1385071	384	DEL	Chr02	1368163	1368163	2461	384	0.00520833	2
Gm02	1455385	1455802	417	DEL	Chr02	1439614	1439614	2464	417	0.00479616	2
Gm02	1465856	1465944	88	DEL	Chr02	1449848	1449848	2467	88	0.0227273	2
Gm02	1484253	1484337	84	DEL	Chr02	1468190	1468190	2469	84	0.0238095	2
Gm02	1495271	1507457	12186	DEL	Chr02	1477538	1477538	2472	12186	1.22255	2
Gm02	1514542	1514707	165	DEL	Chr02	1484599	1484599	2474	165	0.0121212	2
Gm02	1520301	1520479	178	DEL	Chr02	1490187	1490187	2476	178	0.011236	2
Gm02	1555349	1555843	494	DEL	Chr02	1525264	1525441	2478	317	0.00404858	0.0112994
Gm02	1559441	1559702	261	DEL	Chr02	1528975	1528975	2479	261	0.00766284	2
Gm02	1576141	1576242	101	DEL	Chr02	1545434	1545438	2480	97	0.019802	0.5
Gm02	1784545	1787392	2847	DEL	Chr02	1753898	1753939	2485	2806	0.00105374	0.0731707
Gm02	1973847	1983848	10001	DEL	Chr02	1941988	1945572	2490	6417	0.00019998	0.000279018
Gm02	2004539	2004553	14	DEL	Chr02	1967402	1967402	2492	14	0.142857	2
Gm02	2058627	2058728	101	DEL	Chr02	2021426	2021461	2494	66	0.019802	0.0571429
Gm02	2207298	2207349	51	DEL	Chr02	2173442	2173442	2499	51	0.0392157	2
Gm02	2364373	2366019	1646	DEL	Chr02	2331017	2331017	2509	1646	0.00121507	3
Gm02	2382807	2382926	119	DEL	Chr02	2347790	2347791	2510	118	0.0168067	2
Gm02	2431107	2432726	1619	DEL	Chr02	2395938	2396358	2511	1199	0.00123533	0.0047619
Gm02	2519464	2520452	988	DEL	Chr02	2483248	2483248	2516	988	0.00202429	2
Gm02	2546186	2546984	798	DEL	Chr02	2502491	2503275	2518	14	0.00250627	0.00255102
Gm02	2574005	2574106	101	DEL	Chr02	2541616	2541620	2523	97	0.039604	0.5
Gm02	2636150	2636251	101	DEL	Chr02	2616917	2616922	2528	96	0.019802	0.4
Gm02	2790764	2790833	69	DEL	Chr02	2771451	2771451	2530	69	0.0289855	2
Gm02	2842472	2844158	1686	DEL	Chr02	2823117	2823167	2535	1636	0.00118624	0.04
Gm02	2931469	2932737	1268	DEL	Chr02	2911660	2912791	2538	137	0.00157729	0.00176835
Gm02	2960173	2960652	479	DEL	Chr02	2940297	2940305	2539	471	0.00417537	0.25
Gm02	2966372	2966373	1	DEL	Chr02	2946016	2946016	2542	1	1	2
Gm02	2999409	3004453	5044	DEL	Chr02	2978820	2978894	2543	4970	0.000396511	0.027027
Gm02	3118088	3120158	2070	DEL	Chr02	3092539	3092612	2547	1997	0.000966184	0.0273973
Gm02	3376624	3377371	747	DEL	Chr02	3349017	3349172	2551	592	0.00401606	0.0193548
Gm02	3603615	3604085	470	DEL	Chr02	3575144	3575306	2558	308	0.00425532	0.0123457
Gm02	3714232	3714333	101	DEL	Chr02	3685531	3685618	2560	14	0.019802	0.0229885
Gm02	3740143	3740484	341	DEL	Chr02	3711421	3711635	2561	127	0.0058651	0.00934579
Gm02	3801730	3802621	891	DEL	Chr02	3772896	3773411	2562	376	0.00224467	0.0038835
Gm02	4108005	4108101	96	DEL	Chr02	4079245	4079245	2572	96	0.0208333	2
Gm02	4113614	4119840	6226	DEL	Chr02	4084719	4084719	2574	6226	3.00048	2
Gm02	4233124	4233164	40	DEL	Chr02	4199053	4199053	2581	40	0.05	2
Gm02	4313763	4313807	44	DEL	Chr02	4279678	4279678	2584	44	0.0454545	2
Gm02	4368497	4369460	963	DEL	Chr02	4334288	4334288	2587	963	0.00207684	2
Gm02	4492576	4492610	34	DEL	Chr02	4457262	4457262	2589	34	0.0588235	2
Gm02	4530993	4531705	712	DEL	Chr02	4495632	4495637	2590	707	0.00280899	0.4
Gm02	4695374	4696611	1237	DEL	Chr02	4646044	4647251	2596	30	0.00161681	0.001657
Gm02	4749287	4759288	10001	DEL	Chr02	4700003	4700489	2598	9515	0.00019998	0.00411523
Gm02	4770066	4770256	190	DEL	Chr02	4711231	4711233	2599	188	0.0105263	1
Gm02	4848641	4850742	2101	DEL	Chr02	4790929	4791335	2605	1695	0.000951928	0.00492611
Gm02	4869693	4871791	2098	DEL	Chr02	4810340	4811984	2609	454	0.000953289	0.00121655
Gm02	4908315	4908595	280	DEL	Chr02	4849432	4849662	2612	50	0.00714286	0.00869565
Gm02	4927277	4928250	973	DEL	Chr02	4868316	4868707	2613	582	0.0020555	0.00511509
Gm02	4936902	4937011	109	DEL	Chr02	4877359	4877372	2614	96	0.0183486	0.153846
Gm02	4947491	4947492	1	DEL	Chr02	4887897	4887897	2616	1	2	2
Gm02	4967630	4969191	1561	DEL	Chr02	4907757	4909209	2617	109	0.00128123	0.00137741
Gm02	4970666	4970775	109	DEL	Chr02	4910684	4910684	2619	109	0.0183486	2
Gm02	5018101	5019002	901	DEL	Chr02	4957978	4958873	2624	6	0.00221976	0.00223464
Gm02	5029140	5029161	21	DEL	Chr02	4968919	4968919	2626	21	0.0952381	2
Gm02	5049873	5050002	129	DEL	Chr02	4989676	4989676	2627	129	0.0155039	2
Gm02	5052548	5054026	1478	DEL	Chr02	4992176	4993585	2628	69	0.00135318	0.00141945
Gm02	5148834	5149387	553	DEL	Chr02	5088846	5088874	2633	525	0.00361664	0.0714286
Gm02	5166154	5166423	269	DEL	Chr02	5105643	5105708	2634	204	0.00743494	0.0307692
Gm02	5186142	5186847	705	DEL	Chr02	5125437	5125786	2637	356	0.00283688	0.00573066
Gm02	5230464	5231532	1068	DEL	Chr02	5169388	5169394	2638	1062	0.00280899	1.5
Gm02	5272512	5272788	276	DEL	Chr02	5210215	5210215	2641	276	0.00362319	2
Gm02	5297201	5297309	108	DEL	Chr02	5234575	5234575	2643	108	0.0185185	2
Gm02	5492043	5497866	5823	DEL	Chr02	5459092	5459906	2650	5009	0.839086	0.002457
Gm02	5527947	5530457	2510	DEL	Chr02	5489982	5491434	2651	1058	0.000796813	0.00137741
Gm02	5539763	5540116	353	DEL	Chr02	5500733	5500733	2653	353	0.00566572	2
Gm02	5545427	5545606	179	DEL	Chr02	5506056	5506080	2654	155	0.0111732	0.0833333
Gm02	5564530	5568947	4417	DEL	Chr02	5525000	5525000	2656	4417	0.000452796	2
Gm02	5591722	5591936	214	DEL	Chr02	5548019	5548019	2658	214	0.00934579	2
Gm02	5611615	5612640	1025	DEL	Chr02	5569466	5569466	2661	1025	0.00195122	2
Gm02	5634647	5635720	1073	DEL	Chr02	5592158	5592158	2665	1073	0.00186393	2
Gm02	5657309	5658119	810	DEL	Chr02	5613783	5614447	2666	146	0.00246914	0.00301205
Gm02	5926956	5926963	7	DEL	Chr02	5896813	5896813	2674	7	0.285714	2
Gm02	5960660	5960717	57	DEL	Chr02	5931031	5931031	2677	57	0.0350877	2
Gm02	6073955	6076432	2477	DEL	Chr02	6045020	6045313	2685	2184	0.000807428	0.00682594
Gm02	6086676	6086706	30	DEL	Chr02	6055557	6055557	2687	30	0.0666667	2
Gm02	6193720	6197005	3285	DEL	Chr02	6162512	6162512	2689	3285	0.000608828	2
Gm02	6200487	6203203	2716	DEL	Chr02	6170994	6171173	2690	2537	0.000736377	0.0111732
Gm02	6205286	6206982	1696	DEL	Chr02	6173252	6173466	2691	1482	0.00117925	0.00934579
Gm02	6284317	6285797	1480	DEL	Chr02	6251891	6253342	2695	29	0.00135135	0.00137836
Gm02	6311878	6311973	95	DEL	Chr02	6282953	6282955	2697	93	0.0210526	1
Gm02	6325964	6326418	454	DEL	Chr02	6297125	6297484	2700	95	0.00440529	0.00557103
Gm02	6395590	6395691	101	DEL	Chr02	6366665	6366683	2703	83	0.019802	0.111111
Gm02	6449250	6449272	22	DEL	Chr02	6420328	6420328	2707	22	0.0909091	2
Gm02	6459566	6459614	48	DEL	Chr02	6430619	6430619	2709	48	0.0416667	2
Gm02	6472891	6472912	21	DEL	Chr02	6443412	6443412	2713	21	0.0952381	2
Gm02	6490616	6491005	389	DEL	Chr02	6461095	6461095	2715	389	0.00514139	2
Gm02	6512068	6512143	75	DEL	Chr02	6482200	6482200	2717	75	0.0266667	2
Gm02	6587881	6589184	1303	DEL	Chr02	6558024	6559222	2718	105	0.00153492	0.00166945
Gm02	6607548	6614416	6868	DEL	Chr02	6577587	6581744	2719	2711	0.000291206	0.000481116
Gm02	6738323	6738477	154	DEL	Chr02	6705598	6705598	2723	154	0.012987	2
Gm02	6758819	6758920	101	DEL	Chr02	6725874	6725952	2724	23	0.019802	0.025641
Gm02	6762407	6762508	101	DEL	Chr02	6729425	6729425	2726	101	0.019802	2
Gm02	6768170	6768331	161	DEL	Chr02	6734821	6734824	2727	158	0.0124224	0.666667
Gm02	6800711	6802229	1518	DEL	Chr02	6767116	6768601	2728	33	0.00131752	0.0013468
Gm02	6807622	6810677	3055	DEL	Chr02	6774016	6774119	2729	2952	0.000654664	0.0194175
Gm02	6845044	6846840	1796	DEL	Chr02	6808776	6808926	2735	1646	0.00111359	0.0133333
Gm02	6895490	6896465	975	DEL	Chr02	6860205	6861154	2738	26	0.00205128	0.00210748
Gm02	6994559	6994680	121	DEL	Chr02	6959400	6959402	2742	119	0.0165289	1
Gm02	7007116	7007184	68	DEL	Chr02	6971832	6971832	2744	68	0.0294118	2
Gm02	7047916	7047998	82	DEL	Chr02	7012608	7012608	2748	82	0.0243902	2
Gm02	7077883	7077937	54	DEL	Chr02	7053186	7053186	2752	54	0.037037	2
Gm02	7103702	7103744	42	DEL	Chr02	7083403	7083403	2757	42	0.047619	2
Gm02	7121142	7122546	1404	DEL	Chr02	7102033	7103081	2760	356	0.0014245	0.0019084
Gm02	7146954	7147125	171	DEL	Chr02	7127550	7127550	2762	171	0.0116959	2
Gm02	7209465	7209496	31	DEL	Chr02	7189760	7189760	2764	31	0.0645161	2
Gm02	7252377	7252384	7	DEL	Chr02	7232572	7232572	2766	7	0.285714	2
Gm02	7265792	7267359	1567	DEL	Chr02	7245633	7247048	2767	152	0.00127632	0.00141343
Gm02	7269142	7269347	205	DEL	Chr02	7248824	7248918	2768	111	0.0097561	0.0212766
Gm02	7275536	7285572	10036	DEL	Chr02	7255597	7256597	2770	9036	0.000199283	0.002
Gm02	7290193	7290412	219	DEL	Chr02	7261187	7261322	2771	84	0.00913242	0.0148148
Gm02	7425184	7426624	1440	DEL	Chr02	7396439	7397410	2773	469	0.00138889	0.00205973
Gm02	7507617	7507724	107	DEL	Chr02	7481717	7481717	2779	107	0.0186916	2
Gm02	7544432	7546174	1742	DEL	Chr02	7518449	7518449	2781	1742	0.00114811	2
Gm02	7585134	7585443	309	DEL	Chr02	7558267	7558276	2785	300	0.00323625	0.222222
Gm02	7594680	7594781	101	DEL	Chr02	7566999	7567013	2786	87	0.019802	0.142857
Gm02	7603337	7613467	10130	DEL	Chr02	7575623	7585366	2789	387	0.000197433	2.58165
Gm02	7625895	7626018	123	DEL	Chr02	7597846	7597900	2790	69	0.0162602	0.037037
Gm02	7843292	7843569	277	DEL	Chr02	7817588	7817588	2799	277	0.00722022	2
Gm02	7875110	7875155	45	DEL	Chr02	7849212	7849212	2802	45	0.0444444	2
Gm02	7893937	7894053	116	DEL	Chr02	7867986	7868100	2803	2	0.0258621	0.0263158
Gm02	8021492	8021618	126	DEL	Chr02	7998719	7998737	2810	108	0.015873	0.111111
Gm02	8103093	8103337	244	DEL	Chr02	8081121	8081121	2814	244	0.00409836	1
Gm02	8253274	8253686	412	DEL	Chr02	8229161	8229315	2819	258	0.00485437	0.012987
Gm02	8286110	8286539	429	DEL	Chr02	8261772	8261863	2820	338	0.004662	0.021978
Gm02	8395059	8395160	101	DEL	Chr02	8370612	8370677	2822	36	0.019802	0.0307692
Gm02	8489377	8491981	2604	DEL	Chr02	8464996	8467109	2823	491	0.000768049	0.000946522
Gm02	8527957	8528075	118	DEL	Chr02	8504224	8504224	2827	118	0.0169492	2
Gm02	8601367	8601907	540	DEL	Chr02	8577650	8577663	2830	527	0.0037037	0.153846
Gm02	8686231	8686495	264	DEL	Chr02	8664758	8664911	2833	111	0.00757576	0.0130719
Gm02	8801813	8802258	445	DEL	Chr02	8780309	8780375	2834	379	0.00449438	0.030303
Gm02	8894743	8894805	62	DEL	Chr02	8872863	8872863	2836	62	0.0322581	2
Gm02	9331029	9331203	174	DEL	Chr02	9310633	9310681	2842	126	0.0114943	0.0416667
Gm02	9344033	9354053	10020	DEL	Chr02	9323508	9326368	2844	7160	0.000199601	0.00034965
Gm02	9451565	9451569	4	DEL	Chr02	9426677	9426677	2848	4	0.5	2
Gm02	9752524	9755789	3265	DEL	Chr02	9727778	9728277	2855	2766	0.000612557	0.00400802
Gm02	9758262	9758607	345	DEL	Chr02	9730746	9730836	2856	255	0.0057971	0.0222222
Gm02	10314670	10314775	105	DEL	Chr02	10306753	10306753	2860	105	0.0190476	2
Gm02	10425716	10425819	103	DEL	Chr02	10418325	10418398	2862	30	0.0194175	0.0273973
Gm02	10471868	10472870	1002	DEL	Chr02	10464484	10464547	2865	939	0.00199601	0.031746
Gm02	10493780	10494185	405	DEL	Chr02	10485464	10485618	2866	251	0.00493827	0.012987
Gm02	10705636	10705737	101	DEL	Chr02	10697292	10697379	2869	14	0.019802	0.0229885
Gm02	10767172	10767273	101	DEL	Chr02	10758801	10758838	2870	64	0.019802	0.0540541
Gm02	10823635	10823737	102	DEL	Chr02	10816794	10816843	2874	53	0.0196078	0.0408163
Gm02	10828563	10838564	10001	DEL	Chr02	10819952	10820306	2876	9647	0.00019998	0.00282486
Gm02	10888075	10890267	2192	DEL	Chr02	10871326	10871326	2879	2192	0.000912409	2
Gm02	11014425	11016646	2221	DEL	Chr02	10995766	10996501	2885	1486	0.000900495	0.00136054
Gm02	11116913	11121526	4613	DEL	Chr02	11097666	11098224	2889	4055	0.000650336	0.00537634
Gm02	11125009	11127338	2329	DEL	Chr02	11103756	11103757	2891	2328	0.00171748	3
Gm02	11225098	11225650	552	DEL	Chr02	11205656	11205963	2892	245	0.00362319	0.00651466
Gm02	11227106	11227587	481	DEL	Chr02	11207421	11207482	2893	420	0.004158	0.0327869
Gm02	11243457	11243616	159	DEL	Chr02	11223350	11223384	2894	125	0.0125786	0.0588235
Gm02	11305320	11306305	985	DEL	Chr02	11285092	11285092	2896	985	0.00203046	2
Gm02	11376438	11376542	104	DEL	Chr02	11355198	11355283	2897	19	0.0192308	0.0235294
Gm02	11426146	11446647	20501	DEL	Chr02	11404887	11407577	2902	17811	9.75562e-05	0.000371747
Gm02	11763832	11764568	736	DEL	Chr02	11501482	11502173	2916	45	0.00271739	0.00289436
Gm02	11912494	11914693	2199	DEL	Chr02	11651343	11651482	2921	2060	0.000909504	0.0143885
Gm02	11968760	11969194	434	DEL	Chr02	11705544	11705656	2922	322	0.00460829	0.0178571
Gm02	12041755	12042020	265	DEL	Chr02	11778625	11778810	2925	80	0.00754717	0.0108108
Gm02	12048742	12048860	118	DEL	Chr02	11785527	11785555	2926	90	0.0169492	0.0714286
Gm02	12135276	12135624	348	DEL	Chr02	11872176	11872396	2928	128	0.00574713	0.00909091
Gm02	12236805	12236906	101	DEL	Chr02	11973606	11973621	2932	86	0.019802	0.133333
Gm02	12401637	12403519	1882	DEL	Chr02	12139212	12139233	2938	1861	0.0010627	0.0952381
Gm02	12422285	12422306	21	DEL	Chr02	12158136	12158136	2942	21	0.0952381	2
Gm02	12614229	12614372	143	DEL	Chr02	12350183	12350241	2948	85	0.013986	0.0344828
Gm02	12628439	12629086	647	DEL	Chr02	12365210	12365226	2951	631	0.00309119	0.125
Gm02	12655867	12656078	211	DEL	Chr02	12392001	12392001	2953	211	0.00947867	2
Gm02	12735251	12743071	7820	DEL	Chr02	12473122	12473744	2957	7198	0.000255754	0.00321543
Gm02	12753133	12753910	777	DEL	Chr02	12483843	12483843	2960	777	0.003861	2
Gm02	12838781	12840259	1478	DEL	Chr02	12573110	12573110	2966	1478	0.00135318	1
Gm02	12869846	12870708	862	DEL	Chr02	12604622	12605123	2968	361	0.00232019	0.00399202
Gm02	13041492	13042037	545	DEL	Chr02	12777358	12777366	2971	537	0.00366972	0.25
Gm02	13062598	13062699	101	DEL	Chr02	12797918	12798011	2972	8	0.029703	0.0322581
Gm02	13101202	13101511	309	DEL	Chr02	12836449	12836449	2976	309	0.00647249	2
Gm02	13517391	13519071	1680	DEL	Chr02	13250484	13250586	2990	1578	0.00238095	1.01961
Gm02	13528759	13528875	116	DEL	Chr02	13318341	13318349	3003	108	0.0172414	0.25
Gm02	13644945	13645070	125	DEL	Chr02	13435318	13435343	3007	100	0.016	0.08
Gm02	13664294	13664467	173	DEL	Chr02	13450077	13450077	3012	173	0.0115607	1
Gm02	13729860	13730891	1031	DEL	Chr02	13519987	13520106	3017	912	0.00193986	0.0168067
Gm02	13798970	13799071	101	DEL	Chr02	13588190	13588282	3018	9	0.019802	0.0217391
Gm02	13900444	13900989	545	DEL	Chr02	13690230	13690238	3020	537	0.00366972	0.25
Gm02	13927022	13927040	18	DEL	Chr02	13716420	13716420	3023	18	0.111111	2
Gm02	13951293	13952878	1585	DEL	Chr02	13740963	13740963	3026	1585	0.00126183	2
Gm02	13965011	13965684	673	DEL	Chr02	13753112	13753758	3029	27	0.00297177	0.00309598
Gm02	14021335	14021350	15	DEL	Chr02	13812659	13812659	3032	15	0.133333	2
Gm02	14044875	14044976	101	DEL	Chr02	13836244	13836244	3036	101	0.019802	2
Gm02	14248930	14249074	144	DEL	Chr02	14037262	14037353	3042	53	0.0138889	0.021978
Gm02	14319126	14329170	10044	DEL	Chr02	14107715	14108873	3046	8886	0.000199124	0.000863558
Gm02	14349093	14349115	22	DEL	Chr02	14130789	14130789	3048	22	0.136364	3
Gm02	14357225	14358077	852	DEL	Chr02	14138883	14139413	3049	322	0.00234742	1.00566
Gm02	14360479	14360647	168	DEL	Chr02	14141815	14141815	3051	168	0.0119048	2
Gm02	14471472	14471615	143	DEL	Chr02	14254147	14254237	3058	53	0.013986	0.0222222
Gm02	14487150	14487249	99	DEL	Chr02	14269773	14269773	3059	99	0.020202	2
Gm02	14566427	14566528	101	DEL	Chr02	14349263	14349322	3063	42	0.029703	1.05085
Gm02	14612708	14618111	5403	DEL	Chr02	14394284	14394284	3068	5403	0.000370165	2
Gm02	14725316	14725443	127	DEL	Chr02	14504191	14504205	3073	113	0.015748	0.142857
Gm02	14730017	14730118	101	DEL	Chr02	14508778	14508840	3074	39	0.019802	0.0322581
Gm02	14766108	14769573	3465	DEL	Chr02	14545000	14545269	3077	3196	0.000577201	0.00743494
Gm02	14871170	14875267	4097	DEL	Chr02	14660183	14660186	3082	4094	2.08421	0.666667
Gm02	14965720	14966385	665	DEL	Chr02	14753195	14753612	3085	248	0.00300752	0.00479616
Gm02	14970036	14972859	2823	DEL	Chr02	14757263	14757752	3086	2334	0.000708466	0.00408998
Gm02	14997165	14997212	47	DEL	Chr02	14782026	14782026	3088	47	0.0425532	2
Gm02	15095314	15096510	1196	DEL	Chr02	14880498	14880990	3094	704	0.00167224	0.00406504
Gm02	15227943	15228044	101	DEL	Chr02	15012420	15012518	3095	3	0.019802	0.0204082
Gm02	15538514	15539863	1349	DEL	Chr02	15323498	15324202	3099	645	0.00148258	0.00284091
Gm02	15645116	15645623	507	DEL	Chr02	15433567	15433619	3102	455	0.00394477	0.0384615
Gm02	15683362	15683661	299	DEL	Chr02	15471402	15471584	3103	117	0.00668896	0.010989
Gm02	15788073	15789916	1843	DEL	Chr02	15576349	15577284	3106	908	0.00108519	0.00213904
Gm02	15933763	15933954	191	DEL	Chr02	15721683	15721683	3110	191	0.0104712	2
Gm02	15989743	15992054	2311	DEL	Chr02	15782914	15782914	3114	2311	0.000865426	2
Gm02	16008559	16012469	3910	DEL	Chr02	15800457	15800457	3119	3910	0.000511509	2
Gm02	16070726	16070983	257	DEL	Chr02	15865829	15865829	3125	257	0.0077821	2
Gm02	16122501	16123050	549	DEL	Chr02	15908047	15908103	3127	493	0.00364299	0.0357143
Gm02	16150814	16151840	1026	DEL	Chr02	15939541	15939541	3134	1026	0.000974659	1
Gm02	16168267	16168664	397	DEL	Chr02	15956996	15957002	3136	391	0.00503778	0.333333
Gm02	16290142	16300084	9942	DEL	Chr02	16135746	16135746	3157	9942	0.000201167	2
Gm02	16321158	16337613	16455	DEL	Chr02	16161930	16162261	3160	16124	0.000121544	0.0060423
Gm02	16370412	16468739	98327	DEL	Chr02	16197726	16197726	3165	98327	0.782278	2
Gm02	16532353	16532478	125	DEL	Chr02	16266869	16266869	3170	125	0.016	2
Gm02	16618314	16618488	174	DEL	Chr02	16361776	16361878	3174	72	0.0114943	0.0196078
Gm02	16659685	16660464	779	DEL	Chr02	16434615	16434646	3182	748	0.00256739	0.0645161
Gm02	16711151	16714668	3517	DEL	Chr02	16485579	16485579	3186	3517	0.000568666	2
Gm02	16743633	16744181	548	DEL	Chr02	16530826	16530826	3189	548	0.00364964	2
Gm02	16788784	16792907	4123	DEL	Chr02	16575401	16575401	3191	4123	0.000485084	2
Gm02	16810524	16810915	391	DEL	Chr02	16593030	16593030	3193	391	0.00511509	2
Gm02	16824005	16830550	6545	DEL	Chr02	16612508	16612508	3196	6545	0.000305577	2
Gm02	16876426	16886255	9829	DEL	Chr02	16658346	16658346	3198	9829	0.000203479	2
Gm02	16979969	16982047	2078	DEL	Chr02	16764843	16765156	3204	1765	0.000962464	0.00638978
Gm02	17037369	17037530	161	DEL	Chr02	16835359	16835359	3211	161	0.0124224	2
Gm02	17073608	17080085	6477	DEL	Chr02	16881048	16881048	3218	6477	1.00031	2
Gm02	17107840	17107941	101	DEL	Chr02	16908786	16908853	3219	34	0.019802	0.0298507
Gm02	17184107	17204348	20241	DEL	Chr02	16985063	16985063	3221	20241	0.385406	2
Gm02	17269803	17269817	14	DEL	Chr02	17050582	17050582	3225	14	0.142857	2
Gm02	17276478	17276519	41	DEL	Chr02	17057205	17057205	3227	41	0.0487805	2
Gm02	17295691	17295973	282	DEL	Chr02	17076338	17076338	3230	282	1.00709	2
Gm02	17345376	17346377	1001	DEL	Chr02	17139047	17139047	3237	1001	0.001998	2
Gm02	17386995	17387309	314	DEL	Chr02	17178657	17178657	3241	314	0.00636943	2
Gm02	17481922	17488088	6166	DEL	Chr02	17262608	17263477	3248	5297	0.000324359	0.0023015
Gm02	17511837	17513622	1785	DEL	Chr02	17287232	17287844	3249	1173	0.00112045	0.00326797
Gm02	17626966	17635431	8465	DEL	Chr02	17432084	17432084	3263	8465	2.67998	2
Gm02	17726867	17728380	1513	DEL	Chr02	17541163	17541163	3269	1513	0.000660939	1
Gm02	17749972	17753627	3655	DEL	Chr02	17561324	17561324	3271	3655	2.43174	2
Gm02	17884233	17895332	11099	DEL	Chr02	17718670	17718670	3277	11099	0.897919	2
Gm02	17947057	17955900	8843	DEL	Chr02	17772132	17772132	3282	8843	7.05982	2
Gm02	17995015	18002994	7979	DEL	Chr02	18392474	18392474	3288	7979	14.5645	2
Gm02	18040232	18057965	17733	DEL	Chr02	18449053	18449053	3298	17733	0.000112784	2
Gm02	18225007	18225744	737	DEL	Chr02	18625243	18625692	3305	288	0.0027137	0.00445434
Gm02	18359035	18378784	19749	DEL	Chr02	18759859	18778418	3311	1190	0.303712	0.255078
Gm02	18385821	18386852	1031	DEL	Chr02	18785460	18785460	3313	1031	0.00484966	2
Gm02	18421185	18421186	1	DEL	Chr02	18837151	18837151	3318	1	2	2
Gm02	18475451	18475580	129	DEL	Chr02	18891331	18891333	3319	127	0.0155039	1
Gm02	18480736	18480737	1	DEL	Chr02	18896489	18896489	3322	1	1	2
Gm02	18512295	18512438	143	DEL	Chr02	18911218	18911218	3326	143	0.013986	2
Gm02	18585683	18588191	2508	DEL	Chr02	18984910	18987365	3329	53	0.000797448	1.00122
Gm02	18649907	18650070	163	DEL	Chr02	19058392	19058394	3332	161	0.0122699	1
Gm02	18738657	18739335	678	DEL	Chr02	19148190	19148562	3335	306	0.00294985	0.00537634
Gm02	18762419	18762482	63	DEL	Chr02	19171653	19171653	3337	63	0.031746	2
Gm02	18838495	18838496	1	DEL	Chr02	19231237	19231237	3346	1	1	2
Gm02	19001998	19011813	9815	DEL	Chr02	19437721	19437721	3369	9815	1.37962	2
Gm02	19086258	19086337	79	DEL	Chr02	19495525	19495525	3377	79	0.0253165	2
Gm02	19124507	19124962	455	DEL	Chr02	19540747	19540747	3388	455	0	2
Gm02	19190136	19190245	109	DEL	Chr02	19638923	19638923	3396	109	0.577982	3
Gm02	19197230	19205130	7900	DEL	Chr02	19645925	19645925	3398	7900	1.93937	2
Gm02	19210483	19211518	1035	DEL	Chr02	19651278	19651278	3400	1035	1.0029	2
Gm02	19218821	19219120	299	DEL	Chr02	19658596	19658596	3402	299	0.00668896	2
Gm02	19340395	19340499	104	DEL	Chr02	19805830	19805830	3413	104	0.00961538	1
Gm02	19372314	19373121	807	DEL	Chr02	19824303	19824634	3416	476	0.00247831	0.0060423
Gm02	19381751	19384796	3045	DEL	Chr02	19833265	19833265	3418	3045	0.000656814	2
Gm02	19421798	19423605	1807	DEL	Chr02	19867781	19867781	3424	1807	0	2
Gm02	19477036	19498659	21623	DEL	Chr02	19907260	19907260	3427	21623	9.24941e-05	2
Gm02	19522782	19523813	1031	DEL	Chr02	19950630	19950630	3434	1031	0.00193986	2
Gm02	19526542	19526638	96	DEL	Chr02	19953357	19953357	3435	96	0.0208333	2
Gm02	19566955	19583527	16572	DEL	Chr02	20019574	20019574	3442	16572	0.805877	2
Gm02	19619377	19623744	4367	DEL	Chr02	20080569	20080569	3451	4367	0	2
Gm02	19670441	19670836	395	DEL	Chr02	20115771	20115771	3454	395	0.00506329	1
Gm02	20391304	20401855	10551	DEL	Chr02	17843637	17843637	3461	10551	0.000189555	2
Gm02	20417473	20417582	109	DEL	Chr02	17864912	17864912	3466	109	0.0275229	3
Gm02	20494265	20494285	20	DEL	Chr02	17941379	17941379	3468	20	0.1	2
Gm02	20516882	20518550	1668	DEL	Chr02	17964016	17964016	3470	1668	0.00119904	2
Gm02	20603363	20607985	4622	DEL	Chr02	18048901	18048901	3472	4622	0.000432713	2
Gm02	20710168	20710911	743	DEL	Chr02	18151219	18151249	3473	713	0.00269179	0.0666667
Gm02	20723084	20723208	124	DEL	Chr02	18163453	18163454	3474	123	0.016129	2
Gm02	20774145	20782076	7931	DEL	Chr02	18217236	18217236	3481	7931	0.000126088	2
Gm02	21008825	21009252	427	DEL	Chr02	21794076	21794360	3502	143	0.00468384	0.00704225
Gm02	21050095	21051152	1057	DEL	Chr02	21753301	21753311	3503	1047	0.00189215	0.2
Gm02	21143165	21143454	289	DEL	Chr02	21611239	21611239	3523	289	0.00692042	1
Gm02	21221796	21222143	347	DEL	Chr02	20686636	20686636	3532	347	0.00576369	2
Gm02	21230813	21239867	9054	DEL	Chr02	20695309	20695310	3534	9053	0.000110448	2
Gm02	21449295	21450406	1111	DEL	Chr02	20912644	20913681	3549	74	0.00180018	0.00192864
Gm02	21452733	21453766	1033	DEL	Chr02	20916012	20916206	3550	839	0.00193611	0.0103093
Gm02	21510630	21519914	9284	DEL	Chr02	20973026	20974509	3552	7801	5.50495	0.00134862
Gm02	21630086	21630186	100	DEL	Chr02	21074919	21074919	3562	100	0	2
Gm02	21723777	21723838	61	DEL	Chr02	21169289	21169289	3566	61	0.0327869	2
Gm02	21735537	21739496	3959	DEL	Chr02	21180955	21180955	3568	3959	0.000505178	2
Gm02	21833161	21833660	499	DEL	Chr02	21295773	21295773	3576	499	0.00400802	2
Gm02	21853898	21853899	1	DEL	Chr02	21315939	21315939	3582	1	1	2
Gm02	21901258	21904900	3642	DEL	Chr02	21349415	21349415	3588	3642	0.000549149	2
Gm02	21929970	21930403	433	DEL	Chr02	21374534	21374538	3589	429	0.00461894	0.5
Gm02	22002290	22003335	1045	DEL	Chr02	21434414	21434414	3595	1045	0	2
Gm02	22090422	22090576	154	DEL	Chr02	21525623	21525623	3601	154	0.012987	2
Gm02	22254058	22257892	3834	DEL	Chr02	20580894	20580894	3625	3834	0.000521648	2
Gm02	22400927	22405664	4737	DEL	Chr02	21842400	21842400	3642	4737	0.000422208	3
Gm02	22443975	22461054	17079	DEL	Chr02	21880218	21880218	3646	17079	0.595527	2
Gm02	22527451	22528430	979	DEL	Chr02	21946224	21946884	3648	319	0.0020429	0.0030303
Gm02	22583559	22584793	1234	DEL	Chr02	22002723	22002723	3656	1234	0	2
Gm02	22682818	22690457	7639	DEL	Chr02	22106969	22106969	3666	7639	0.000130907	2
Gm02	22716388	22727145	10757	DEL	Chr02	22123213	22123213	3669	10757	9.29627e-05	2
Gm02	22787879	22800571	12692	DEL	Chr02	22167803	22167904	3691	12591	7.87898e-05	0.00990099
Gm02	23055388	23055389	1	DEL	Chr02	31041605	31041605	3699	1	3	2
Gm02	23062228	23063228	1000	DEL	Chr02	31036173	31036173	3701	1000	0.002	2
Gm02	23070169	23078487	8318	DEL	Chr02	31029242	31029242	3705	8318	0.286247	2
Gm02	23175988	23176284	296	DEL	Chr02	30934344	30934344	3713	296	0.00675676	2
Gm02	23198032	23198442	410	DEL	Chr02	30903236	30903247	3716	399	0.00487805	0.181818
Gm02	23322160	23324632	2472	DEL	Chr02	30752966	30752981	3730	2457	0.00121359	0.2
Gm02	23356306	23356995	689	DEL	Chr02	30721263	30721263	3732	689	0.00290276	2
Gm02	23397903	23398692	789	DEL	Chr02	30713808	30713808	3736	789	0	1
Gm02	23472743	23485751	13008	DEL	Chr02	22257373	22257373	3744	13008	7.68758e-05	2
Gm02	23653138	23653390	252	DEL	Chr02	20261726	20261727	3760	251	0.686508	2
Gm02	23780211	23792087	11876	DEL	Chr02	20375017	20375017	3762	11876	1.613	2
Gm02	23877749	23878909	1160	DEL	Chr02	20469997	20469997	3766	1160	0.00172414	2
Gm02	23928970	23929225	255	DEL	Chr02	20521417	20521447	3771	225	0.00784314	0.0666667
Gm02	23997473	23997857	384	DEL	Chr02	29318478	29318478	3791	384	0	1
Gm02	23998695	24012068	13373	DEL	Chr02	29325077	29325077	3793	13373	7.47775e-05	1
Gm02	24048916	24049139	223	DEL	Chr02	29361818	29361818	3796	223	0.00896861	2
Gm02	24063449	24084726	21277	DEL	Chr02	29376149	29376149	3798	21277	0.808009	2
Gm02	24185502	24189445	3943	DEL	Chr02	29508028	29508030	3809	3941	0.000507228	1
Gm02	24196874	24200137	3263	DEL	Chr02	29515457	29515457	3811	3263	0.979773	2
Gm02	24212142	24219807	7665	DEL	Chr02	29527457	29529444	3812	5678	1.18682	1.00151
Gm02	24351039	24351069	30	DEL	Chr02	29664461	29664461	3818	30	0.0666667	2
Gm02	24561595	24561596	1	DEL	Chr02	29904417	29904417	3828	1	1	2
Gm02	24611029	24611111	82	DEL	Chr02	29936320	29936320	3833	82	0.0121951	1
Gm02	24675118	24676187	1069	DEL	Chr02	30001134	30001134	3837	1069	0.000935454	1
Gm02	24697756	24697901	145	DEL	Chr02	30024336	30024336	3840	145	0.0137931	2
Gm02	24787205	24789456	2251	DEL	Chr02	30114337	30114340	3845	2248	0.000888494	0.666667
Gm02	24892906	24892972	66	DEL	Chr02	28722045	28722045	3851	66	0.030303	2
Gm02	25031151	25032152	1001	DEL	Chr02	28867781	28867781	3857	1001	0.001998	2
Gm02	25043850	25061790	17940	DEL	Chr02	28879391	28879391	3861	17940	2.49147	2
Gm02	25150794	25151480	686	DEL	Chr02	28965913	28965913	3866	686	0.00291545	1
Gm02	25403877	25405605	1728	DEL	Chr02	29274037	29274138	3885	1627	0.000578704	0.019802
Gm02	25466717	25467758	1041	DEL	Chr02	28641483	28641504	3897	1020	0.00192123	0.0952381
Gm02	25473120	25473247	127	DEL	Chr02	28636103	28636116	3899	114	0.00787402	0.153846
Gm02	25489963	25491066	1103	DEL	Chr02	28620366	28620366	3901	1103	0.00181324	2
Gm02	25552610	25554194	1584	DEL	Chr02	28552747	28553199	3905	1132	0.00126263	0.00442478
Gm02	25560229	25570034	9805	DEL	Chr02	28545648	28545648	3909	9805	0.000203978	2
Gm02	25605510	25605642	132	DEL	Chr02	28505598	28505598	3913	132	0.0151515	2
Gm02	25630365	25630366	1	DEL	Chr02	28480856	28480856	3916	1	1	2
Gm02	25714272	25714630	358	DEL	Chr02	28406422	28406709	3919	71	0.00558659	0.00696864
Gm02	25886910	25888851	1941	DEL	Chr02	28230128	28230161	3927	1908	0.0010304	0.0606061
Gm02	25895298	25895694	396	DEL	Chr02	28220037	28220037	3930	396	0.00252525	1
Gm02	26098356	26098462	106	DEL	Chr02	28012968	28012968	3936	106	0.0188679	2
Gm02	26321466	26321567	101	DEL	Chr02	27789934	27789989	3941	46	0.019802	0.0363636
Gm02	26392745	26402746	10001	DEL	Chr02	27712184	27718414	3944	3771	0.00019998	0.935795
Gm02	26405230	26407848	2618	DEL	Chr02	27707383	27709700	3945	301	1.65126	1.62106
Gm02	26425911	26426216	305	DEL	Chr02	27682987	27683143	3947	149	0.00655738	0.0128205
Gm02	26430842	26430860	18	DEL	Chr02	27678361	27678361	3949	18	0.111111	2
Gm02	26645592	26645603	11	DEL	Chr02	27452816	27452816	3953	11	0.181818	2
Gm02	26791529	26791533	4	DEL	Chr02	27297959	27297959	3963	4	0.5	2
Gm02	26862733	26862827	94	DEL	Chr02	27226510	27226512	3965	92	0.0212766	1
Gm02	26882954	26885252	2298	DEL	Chr02	27206349	27206372	3966	2275	0.000870322	0.0869565
Gm02	26943034	26943219	185	DEL	Chr02	27145915	27146022	3969	78	0.0108108	0.0186916
Gm02	26954879	26955280	401	DEL	Chr02	27133882	27134139	3971	144	0.00498753	0.0077821
Gm02	26961272	26963176	1904	DEL	Chr02	27126505	27127890	3972	519	0.00105042	0.00144404
Gm02	26997401	26998402	1001	DEL	Chr02	27102245	27102245	3976	1001	0.001998	2
Gm02	27172708	27173709	1001	DEL	Chr02	26889272	26889272	3991	1001	1.002	2
Gm02	27287835	27287866	31	DEL	Chr02	26774027	26774027	3995	31	0.0645161	2
Gm02	27338959	27338971	12	DEL	Chr02	26670607	26670607	4006	12	0.166667	2
Gm02	27362631	27368356	5725	DEL	Chr02	26646943	26646943	4008	5725	3.00087	2
Gm02	27574655	27575804	1149	DEL	Chr02	26438614	26438614	4015	1149	0.00348129	3
Gm02	27683272	27684375	1103	DEL	Chr02	26310073	26311168	4022	8	0.00181324	0.00182648
Gm02	27708641	27708996	355	DEL	Chr02	26285809	26285809	4024	355	0.0056338	2
Gm02	28067881	28068035	154	DEL	Chr02	25923013	25923037	4038	130	0.012987	0.0833333
Gm02	28223293	28226606	3313	DEL	Chr02	25764078	25764299	4040	3092	0.000603682	0.00904977
Gm02	28543185	28543527	342	DEL	Chr02	25438664	25438700	4046	306	0.00584795	0.0555556
Gm02	28600206	28600845	639	DEL	Chr02	25381966	25381966	4048	639	0.00312989	2
Gm02	28718180	28718282	102	DEL	Chr02	25251379	25251442	4052	39	0.0196078	0.031746
Gm02	28798444	28798561	117	DEL	Chr02	25171212	25171214	4053	115	0.017094	1
Gm02	29118829	29119919	1090	DEL	Chr02	24847106	24847135	4062	1061	0.00183486	0.0689655
Gm02	29301739	29301863	124	DEL	Chr02	24664934	24664938	4066	120	0.016129	0.5
Gm02	29497963	29501554	3591	DEL	Chr02	24459730	24459976	4070	3345	0.000556948	0.00813008
Gm02	29656289	29656403	114	DEL	Chr02	24300823	24300823	4075	114	0.0175439	2
Gm02	29865582	29865985	403	DEL	Chr02	24090887	24090896	4079	394	0.00496278	0.222222
Gm02	29932319	30001303	68984	DEL	Chr02	24022558	24022558	4084	68984	0.877537	2
Gm02	30011924	30012025	101	DEL	Chr02	24020143	24020157	4085	87	0.019802	0.142857
Gm02	30049494	30049495	1	DEL	Chr02	23982736	23982736	4088	1	2	2
Gm02	30680888	30680961	73	DEL	Chr02	23341007	23341007	4099	73	0.0273973	3
Gm02	30921446	30921873	427	DEL	Chr02	23084163	23084405	4106	185	0.00468384	0.00826446
Gm02	30999669	31000735	1066	DEL	Chr02	23005669	23006386	4107	349	0.00187617	0.0027894
Gm02	31122978	31123186	208	DEL	Chr02	22883323	22883323	4111	208	0.00961538	2
Gm02	31245424	31245428	4	DEL	Chr02	22760154	22760154	4117	4	0.5	2
Gm02	31313143	31313245	102	DEL	Chr02	22692410	22692477	4118	35	0.0196078	0.0298507
Gm02	31344766	31344839	73	DEL	Chr02	22660889	22660889	4120	73	0.0273973	2
Gm02	31375191	31375332	141	DEL	Chr02	22630535	22630548	4121	128	0.0141844	0.153846
Gm02	31609260	31609362	102	DEL	Chr02	22396623	22396623	4124	102	0.0196078	1
Gm02	32169286	32169387	101	DEL	Chr02	35124157	35124192	4149	66	0.019802	0.0571429
Gm02	32279584	32279685	101	DEL	Chr02	35234337	35234408	4150	30	0.019802	0.028169
Gm02	32374583	32375186	603	DEL	Chr02	35329628	35329714	4156	517	0.00331675	0.0232558
Gm02	32816151	32816413	262	DEL	Chr02	32828830	32828830	4167	262	0.00763359	2
Gm02	32822551	32822652	101	DEL	Chr02	32822733	32822748	4168	86	0.019802	0.133333
Gm02	32988066	32995235	7169	DEL	Chr02	32630519	32630520	4177	7168	0.000139489	3
Gm02	33167493	33167808	315	DEL	Chr02	32472821	32472821	4181	315	0.00634921	2
Gm02	33346462	33346563	101	DEL	Chr02	32294188	32294188	4183	101	0.039604	2
Gm02	33777321	33777486	165	DEL	Chr02	31851908	31851908	4189	165	0.0121212	2
Gm02	34114664	34132166	17502	DEL	Chr02	31508039	31508039	4209	17502	2.33322	2
Gm02	34157952	34158102	150	DEL	Chr02	34586255	34586255	4211	150	0.0133333	2
Gm02	34549611	34549745	134	DEL	Chr02	34186327	34186379	4215	82	0.0149254	0.0384615
Gm02	34554219	34556977	2758	DEL	Chr02	34181504	34181841	4216	2421	0.000725163	0.00593472
Gm02	34978376	34980691	2315	DEL	Chr02	33744671	33744671	4225	2315	0.00172786	3
Gm02	35294461	35294580	119	DEL	Chr02	33430501	33430617	4233	3	0.0336134	0.0172414
Gm02	35627248	35627400	152	DEL	Chr02	33097576	33097576	4238	152	0.0131579	1
Gm02	35843242	35844583	1341	DEL	Chr02	35724295	35724466	4242	1170	0.00149142	0.0116959
Gm02	35949047	35949386	339	DEL	Chr02	35833649	35833776	4246	212	0.0147493	2.75591
Gm02	35958729	35958884	155	DEL	Chr02	35843114	35843114	4248	155	0.0129032	3
Gm02	35965976	35966077	101	DEL	Chr02	35849955	35849983	4249	73	0.039604	1.10714
Gm02	36436947	36438057	1110	DEL	Chr02	36329702	36330744	4262	68	0.0018018	0.00191939
Gm02	36469576	36470199	623	DEL	Chr02	36362199	36362238	4264	584	0.00321027	0.0512821
Gm02	36616241	36616346	105	DEL	Chr02	36508322	36508387	4269	40	0.0190476	0.0307692
Gm02	36631802	36631816	14	DEL	Chr02	36523842	36523842	4271	14	0.142857	2
Gm02	36793373	36793706	333	DEL	Chr02	36685429	36685501	4272	261	0.00600601	0.0277778
Gm02	37429617	37429746	129	DEL	Chr02	37326766	37326767	4288	128	0.0155039	2
Gm02	37570492	37570593	101	DEL	Chr02	37467604	37467672	4290	33	0.019802	0.0294118
Gm02	37700842	37710845	10003	DEL	Chr02	37598223	37598494	4295	9732	0.00019994	0.00738007
Gm02	37818631	37818942	311	DEL	Chr02	37708444	37708444	4300	311	0.00643087	2
Gm02	37924532	37924633	101	DEL	Chr02	37814040	37814060	4301	81	0.019802	0.1
Gm02	37983055	37983156	101	DEL	Chr02	37872595	37872647	4303	49	0.019802	0.0384615
Gm02	38066215	38066395	180	DEL	Chr02	37955689	37955689	4307	180	0.0111111	2
Gm02	38096138	38096408	270	DEL	Chr02	37985386	37985541	4308	115	0.00740741	0.0129032
Gm02	38106226	38106360	134	DEL	Chr02	37995354	37995354	4310	134	0.0149254	2
Gm02	38130527	38130880	353	DEL	Chr02	38018839	38018937	4311	255	0.00566572	0.0204082
Gm02	38252087	38252188	101	DEL	Chr02	38141144	38141234	4314	11	0.019802	0.0222222
Gm02	38576236	38576708	472	DEL	Chr02	38467909	38467932	4325	449	0.00423729	0.0869565
Gm02	38795609	38795713	104	DEL	Chr02	38687169	38687184	4334	89	0.0192308	0.133333
Gm02	38992486	38994421	1935	DEL	Chr02	38883860	38885794	4335	1	0.00103359	0.00103413
Gm02	39024311	39024427	116	DEL	Chr02	38916601	38916708	4337	9	0.0172414	0.0186916
Gm02	39128691	39128823	132	DEL	Chr02	39034769	39034784	4343	117	0.0151515	0.133333
Gm02	39133633	39134199	566	DEL	Chr02	39039591	39039948	4344	209	0.00353357	0.00560224
Gm02	39273722	39273823	101	DEL	Chr02	39179406	39179425	4345	82	0.019802	0.105263
Gm02	39365365	39365366	1	DEL	Chr02	39270914	39270914	4347	1	2	2
Gm02	39376932	39376963	31	DEL	Chr02	39282429	39282429	4349	31	0.0645161	2
Gm02	39457887	39459511	1624	DEL	Chr02	39363286	39363336	4350	1574	0.00123153	0.04
Gm02	39487467	39487932	465	DEL	Chr02	39393023	39393337	4354	151	0.00430108	0.00636943
Gm02	39531404	39531612	208	DEL	Chr02	39436811	39436836	4357	183	0.00961538	0.08
Gm02	39540257	39540988	731	DEL	Chr02	39445432	39446065	4358	98	0.00273598	0.00315956
Gm02	39544425	39544813	388	DEL	Chr02	39449480	39449480	4360	388	0.00515464	2
Gm02	39579472	39583157	3685	DEL	Chr02	39484089	39486017	4361	1757	0.000542741	0.00103734
Gm02	39698299	39699778	1479	DEL	Chr02	39607036	39607036	4369	1479	0.000676133	1
Gm02	39706937	39706976	39	DEL	Chr02	39612944	39612944	4371	39	0.0512821	2
Gm02	39743075	39743438	363	DEL	Chr02	39648816	39648816	4373	363	0.00550964	2
Gm02	39785775	39785944	169	DEL	Chr02	39691401	39691401	4378	169	0.0118343	2
Gm02	39981156	39981234	78	DEL	Chr02	39890721	39890721	4386	78	0.0128205	2
Gm02	40005102	40005357	255	DEL	Chr02	39914535	39914535	4387	255	0.00784314	2
Gm02	40062323	40062427	104	DEL	Chr02	39973240	39973272	4393	72	0.0192308	0.0625
Gm02	40137903	40138653	750	DEL	Chr02	40048741	40049242	4394	249	0.00266667	0.00399202
Gm02	40203591	40203621	30	DEL	Chr02	40114459	40114459	4399	30	0.0666667	2
Gm02	40387759	40389770	2011	DEL	Chr02	40303947	40304433	4408	1525	0.00099453	0.00411523
Gm02	40469125	40474023	4898	DEL	Chr02	40384101	40386132	4411	2867	0.00040833	0.000984737
Gm02	40478308	40479510	1202	DEL	Chr02	40390404	40390459	4412	1147	0.00166389	0.0363636
Gm02	40563821	40563946	125	DEL	Chr02	40474820	40474820	4414	125	0.016	2
Gm02	40622238	40622441	203	DEL	Chr02	40522521	40522530	4422	194	0.00985222	0.222222
Gm02	40628432	40628897	465	DEL	Chr02	40528547	40528547	4423	465	0.00430108	2
Gm02	40675135	40675541	406	DEL	Chr02	40575789	40575789	4428	406	0.00492611	2
Gm02	40717183	40717570	387	DEL	Chr02	40617354	40617354	4430	387	0.00516796	2
Gm02	40932174	40932511	337	DEL	Chr02	40841690	40841690	4441	337	0.00593472	2
Gm02	40938457	40938685	228	DEL	Chr02	40847635	40847635	4443	228	0.00877193	2
Gm02	40949443	40950399	956	DEL	Chr02	40858393	40859123	4444	226	0.00209205	0.00273973
Gm02	40975559	40976502	943	DEL	Chr02	40884329	40885248	4445	24	0.00212089	0.00217628
Gm02	41044328	41051515	7187	DEL	Chr02	40953242	40953242	4450	7187	0.874774	2
Gm02	41186386	41188885	2499	DEL	Chr02	41088904	41088940	4454	2463	0.00080032	0.0555556
Gm02	41327570	41333227	5657	DEL	Chr02	41227802	41229243	4457	4216	0.000353544	0.00138793
Gm02	41355670	41356864	1194	DEL	Chr02	41253312	41254461	4459	45	0.00167504	0.00174064
Gm02	41378809	41378823	14	DEL	Chr02	41286518	41286518	4465	14	0.142857	2
Gm02	41456710	41457131	421	DEL	Chr02	41370977	41370977	4471	421	0.0023753	1
Gm02	41527219	41527527	308	DEL	Chr02	41439792	41440061	4474	39	0.00649351	0.00743494
Gm02	41529178	41529830	652	DEL	Chr02	41441712	41441917	4475	447	0.00306748	0.0097561
Gm02	41639122	41640439	1317	DEL	Chr02	41551098	41551209	4480	1206	0.0015186	0.018018
Gm02	41722322	41726118	3796	DEL	Chr02	41634308	41635770	4483	2334	0.00052687	0.00136799
Gm02	41729397	41731713	2316	DEL	Chr02	41639049	41639049	4485	2316	0.000863558	2
Gm02	41957097	41968931	11834	DEL	Chr02	41864345	41864345	4492	11834	4.84122	3
Gm02	42079303	42080430	1127	DEL	Chr02	41974018	41974697	4497	448	0.000887311	0.00294551
Gm02	42180656	42181825	1169	DEL	Chr02	42092813	42093857	4506	125	0.00171086	0.00191571
Gm02	42189437	42189601	164	DEL	Chr02	42101407	42101409	4507	162	0.0121951	1
Gm02	42195275	42198364	3089	DEL	Chr02	42107015	42107026	4508	3078	0.000647459	0.181818
Gm02	42284283	42284300	17	DEL	Chr02	42193862	42193862	4516	17	0.117647	2
Gm02	42317804	42317905	101	DEL	Chr02	42227286	42227331	4517	56	0.019802	0.0444444
Gm02	42327577	42327631	54	DEL	Chr02	42237239	42237239	4521	54	0.037037	2
Gm02	42345847	42346873	1026	DEL	Chr02	42255433	42255638	4522	821	0.00194932	0.0097561
Gm02	42359760	42360110	350	DEL	Chr02	42268530	42268614	4523	266	0.00571429	0.0238095
Gm02	42432084	42432186	102	DEL	Chr02	42342763	42342825	4535	40	0.00980392	0.0322581
Gm02	42433607	42433861	254	DEL	Chr02	42344180	42344333	4536	101	0.00787402	0.0130719
Gm02	42477371	42477606	235	DEL	Chr02	42388986	42388986	4540	235	0.00851064	2
Gm02	42505959	42506071	112	DEL	Chr02	42417149	42417152	4541	109	0.0178571	0.666667
Gm02	42538114	42538500	386	DEL	Chr02	42446347	42446351	4547	382	0.00518135	0.5
Gm02	42563373	42565620	2247	DEL	Chr02	42471244	42471244	4550	2247	2.00045	1
Gm02	42661431	42662934	1503	DEL	Chr02	42577109	42577109	4564	1503	0.00133067	2
Gm02	42668596	42668739	143	DEL	Chr02	42592385	42592387	4567	141	0.013986	1
Gm02	42850773	42851230	457	DEL	Chr02	42775293	42775293	4575	457	0.00437637	2
Gm02	42858581	42858682	101	DEL	Chr02	42782675	42782686	4576	90	0.019802	0.181818
Gm02	42910360	42910378	18	DEL	Chr02	42835429	42835429	4584	18	0.111111	2
Gm02	43042074	43045459	3385	DEL	Chr02	42968675	42968675	4591	3385	0.000295421	2
Gm02	43316671	43316685	14	DEL	Chr02	43248853	43248853	4609	14	0.142857	2
Gm02	43452262	43454926	2664	DEL	Chr02	43386325	43386409	4611	2580	0.000750751	0.0238095
Gm02	43486939	43487248	309	DEL	Chr02	43418428	43418686	4612	51	0.00647249	0.00775194
Gm02	43734179	43734959	780	DEL	Chr02	43665738	43666213	4613	305	0.0025641	0.00421053
Gm02	43871208	43871640	432	DEL	Chr02	43802492	43802495	4614	429	0.00462963	0.666667
Gm02	43987913	43989464	1551	DEL	Chr02	43918768	43919168	4617	1151	0.00128949	0.005
Gm02	44010717	44013686	2969	DEL	Chr02	43940584	43940973	4618	2580	0.000673627	0.00514139
Gm02	44238035	44238407	372	DEL	Chr02	44176789	44176790	4623	371	0.00537634	2
Gm02	44247070	44247108	38	DEL	Chr02	44185489	44185489	4625	38	0.0526316	2
Gm02	44253720	44253891	171	DEL	Chr02	44192103	44192103	4627	171	0.0116959	2
Gm02	44292394	44292414	20	DEL	Chr02	44230701	44230701	4630	20	0.1	2
Gm02	44364564	44364800	236	DEL	Chr02	44308004	44308034	4635	206	0.00847458	0.0666667
Gm02	44407952	44407953	1	DEL	Chr02	44351195	44351195	4637	1	2	2
Gm02	44438820	44439522	702	DEL	Chr02	44381999	44382696	4638	5	0.002849	0.00286944
Gm02	44469568	44475010	5442	DEL	Chr02	44412620	44412620	4640	5442	0.000367512	2
Gm02	44479515	44479859	344	DEL	Chr02	44417410	44417410	4645	344	0.00290698	1
Gm02	44498540	44499555	1015	DEL	Chr02	44430052	44430870	4649	197	0.000985222	0.00244499
Gm02	44507077	44513091	6014	DEL	Chr02	44438317	44438317	4651	6014	0.000332557	2
Gm02	44558053	44559063	1010	DEL	Chr02	44483283	44483503	4655	790	0.0019802	0.00454545
Gm02	44561537	44562286	749	DEL	Chr02	44486504	44486648	4656	605	0.00267023	0.0138889
Gm02	44564661	44567483	2822	DEL	Chr02	44489020	44491678	4657	164	0.000708717	0.000752445
Gm02	44597811	44597890	79	DEL	Chr02	44522074	44522074	4659	79	0.0126582	2
Gm02	44852628	44862629	10001	DEL	Chr02	44776914	44777081	4663	9834	0.00019998	0.011976
Gm02	44873440	44880183	6743	DEL	Chr02	44788128	44788128	4666	6743	0.000296604	2
Gm02	45043296	45045104	1808	DEL	Chr02	44949402	44950298	4674	912	0.00110619	0.00223214
Gm02	45054034	45055381	1347	DEL	Chr02	44959211	44959211	4676	1347	0.00148478	2
Gm02	45095598	45095629	31	DEL	Chr02	44999329	44999329	4679	31	0.0645161	2
Gm02	45210766	45210793	27	DEL	Chr02	45115254	45115254	4685	27	0.0740741	2
Gm02	45274040	45275248	1208	DEL	Chr02	45179664	45180837	4689	35	0.00165563	0.00170503
Gm02	45279609	45279703	94	DEL	Chr02	45185191	45185191	4691	94	0.0212766	2
Gm02	45298905	45298931	26	DEL	Chr02	45204451	45204451	4694	26	0.0769231	2
Gm02	45455977	45456078	101	DEL	Chr02	45361670	45361743	4699	28	0.019802	0.0273973
Gm02	45546697	45547102	405	DEL	Chr02	45452488	45452816	4702	77	0.00493827	0.00609756
Gm02	45591362	45591463	101	DEL	Chr02	45497150	45497157	4705	94	0.019802	0.285714
Gm02	45694324	45694644	320	DEL	Chr02	45601205	45601205	4713	320	0.00625	2
Gm02	45721150	45728301	7151	DEL	Chr02	45627692	45627692	4714	7151	9.43756	2
Gm02	45846352	45848302	1950	DEL	Chr02	45746333	45748203	4722	80	0.00102564	0.00106952
Gm02	45865957	45866007	50	DEL	Chr02	45765890	45765890	4725	50	1.06	2
Gm02	45982822	45985091	2269	DEL	Chr02	45882839	45885082	4732	26	0.000881446	0.000891663
Gm02	46215079	46215367	288	DEL	Chr02	46115144	46115421	4738	11	0.00347222	0.00722022
Gm02	46450955	46451171	216	DEL	Chr02	46351168	46351229	4744	155	0.00925926	0.0327869
Gm02	46789175	46789276	101	DEL	Chr02	46689249	46689266	4747	84	0.019802	0.117647
Gm02	46791166	46791280	114	DEL	Chr02	46691157	46691218	4748	53	0.0175439	0.0327869
Gm02	46957242	46957359	117	DEL	Chr02	46859961	46859961	4753	117	0.017094	2
Gm02	47058729	47059546	817	DEL	Chr02	46961255	46961261	4756	811	0.00244798	0.333333
Gm02	47120155	47120312	157	DEL	Chr02	47027062	47027062	4761	157	0.0127389	2
Gm02	47154164	47155168	1004	DEL	Chr02	47061002	47061002	4763	1004	0.00199203	2
Gm02	47160201	47160915	714	DEL	Chr02	47066011	47066011	4766	714	0.00140056	1
Gm02	47163635	47163636	1	DEL	Chr02	47068934	47068934	4768	1	2	2
Gm02	47222961	47223813	852	DEL	Chr02	47130387	47130389	4771	850	0.00234742	1
Gm02	47230462	47230569	107	DEL	Chr02	47137040	47137042	4772	105	0.0186916	1
Gm02	47264993	47265948	955	DEL	Chr02	47171760	47171760	4776	955	0.00209424	2
Gm02	47284147	47284320	173	DEL	Chr02	47190023	47190023	4780	173	0.0115607	2
Gm02	47286396	47286603	207	DEL	Chr02	47192082	47192092	4781	197	0.00966184	0.2
Gm02	47381023	47382524	1501	DEL	Chr02	47286489	47286489	4785	1501	0.00133245	2
Gm02	47408680	47412618	3938	DEL	Chr02	47312712	47312712	4787	3938	1.68766	2
Gm02	47444891	47445528	637	DEL	Chr02	47345053	47345053	4790	637	0.00313972	2
Gm02	47587591	47589010	1419	DEL	Chr02	47487252	47487541	4797	1130	0.00140944	0.00692042
Gm02	47672489	47672661	172	DEL	Chr02	47570968	47571013	4798	127	0.0116279	0.0444444
Gm02	47855090	47855179	89	DEL	Chr02	47753522	47753522	4803	89	0.0224719	2
Gm02	47882547	47882606	59	DEL	Chr02	47781016	47781016	4808	59	0.0338983	2
Gm02	47957649	47958863	1214	DEL	Chr02	47857674	47857848	4811	1040	0.00164745	0.0114943
Gm02	48169138	48169279	141	DEL	Chr02	48065709	48065709	4819	141	0.0141844	2
Gm02	48181052	48181300	248	DEL	Chr02	48077891	48078065	4823	74	0.00806452	0.0114943
Gm02	48371599	48372264	665	DEL	Chr02	48268281	48268933	4829	13	0.00300752	0.00306748
Gm02	48399949	48400621	672	DEL	Chr02	48297086	48297416	4832	342	0.00297619	0.00606061
Gm02	48407100	48408801	1701	DEL	Chr02	48308458	48308458	4836	1701	0.00117578	2
Gm02	48432939	48433104	165	DEL	Chr02	48332967	48332967	4841	165	0.0121212	2
Gm02	48481831	48487267	5436	DEL	Chr02	48381876	48381876	4845	5436	2.99963	2
Gm02	227499	227499	0	INS	Chr02	222417	222533	2396	116	2	0.0172414
Gm02	417480	417480	0	INS	Chr02	398239	398376	2424	137	2	0.0145985
Gm02	427437	427595	158	INS	Chr02	408250	408518	2427	268	0.0126582	0.00746269
Gm02	432947	433577	630	INS	Chr02	413843	414711	2428	868	0.0031746	0.00230415
Gm02	458252	458252	0	INS	Chr02	439299	439783	2430	484	2	0.00413223
Gm02	485800	485800	0	INS	Chr02	467618	468346	2432	728	2	0.00274725
Gm02	616528	616528	0	INS	Chr02	598224	599971	2437	1747	2	0.00114482
Gm02	681897	681897	0	INS	Chr02	665280	666036	2440	756	2	0.0026455
Gm02	697349	697349	0	INS	Chr02	681572	681736	2442	164	2	0.0121951
Gm02	764455	764455	0	INS	Chr02	748880	756567	2446	7687	2	0.00026018
Gm02	1059012	1059116	104	INS	Chr02	1051201	1051733	2449	532	0.0192308	0.0037594
Gm02	1174594	1174771	177	INS	Chr02	1167216	1167400	2450	184	0.0112994	0.0108696
Gm02	1216594	1217247	653	INS	Chr02	1208156	1208941	2452	785	0.00306279	0.00254777
Gm02	1309855	1309976	121	INS	Chr02	1301444	1301583	2456	139	0.00826446	0.00719424
Gm02	1392160	1392184	24	INS	Chr02	1375217	1376408	2462	1191	0.0833333	0.00167926
Gm02	1458949	1458949	0	INS	Chr02	1442760	1443021	2465	261	2	0.00766284
Gm02	1542374	1542993	619	INS	Chr02	1512036	1512916	2477	880	0.00323102	0.00227273
Gm02	1578056	1578157	101	INS	Chr02	1547247	1547456	2481	209	0.019802	0.00956938
Gm02	1972475	1972475	0	INS	Chr02	1938976	1940607	2488	1631	2	0.00122624
Gm02	2117972	2118073	101	INS	Chr02	2080686	2080902	2495	216	0.019802	0.00925926
Gm02	2199657	2199657	0	INS	Chr02	2162611	2165784	2497	3173	2	0.000630318
Gm02	2235095	2235720	625	INS	Chr02	2201456	2202297	2503	841	0.0016	0.00237812
Gm02	2253215	2253347	132	INS	Chr02	2219691	2219852	2506	161	0.0151515	0.0124224
Gm02	2436056	2436879	823	INS	Chr02	2399679	2400540	2512	861	0.00243013	0.00232288
Gm02	2549083	2549994	911	INS	Chr02	2505375	2506904	2519	1529	0.00219539	0.00130804
Gm02	2571261	2571261	0	INS	Chr02	2528138	2529188	2522	1050	3	0.00190476
Gm02	2588417	2588518	101	INS	Chr02	2555928	2556031	2525	103	0.029703	0.990291
Gm02	2614968	2614968	0	INS	Chr02	2589625	2595713	2527	6088	2	2.53351
Gm02	2850611	2850611	0	INS	Chr02	2829619	2830720	2536	1101	2	0.00181653
Gm02	2878548	2878957	409	INS	Chr02	2858654	2859200	2537	546	0.00488998	0.003663
Gm02	3007019	3007233	214	INS	Chr02	2981452	2981712	2544	260	0.00934579	0.00769231
Gm02	3712752	3712853	101	INS	Chr02	3683938	3684152	2559	214	0.019802	0.00934579
Gm02	3924981	3925082	101	INS	Chr02	3895820	3896196	2565	376	0.019802	0.00531915
Gm02	4124402	4124475	73	INS	Chr02	4089207	4090503	2575	1296	0.0273973	0.00154321
Gm02	4146387	4146492	105	INS	Chr02	4112385	4112499	2576	114	0.0190476	0.0175439
Gm02	4187398	4187398	0	INS	Chr02	4153316	4153399	2578	83	2	0.0240964
Gm02	4230053	4230589	536	INS	Chr02	4195885	4196486	2579	601	0.00373134	0.00332779
Gm02	4240049	4240053	4	INS	Chr02	4205940	4206064	2582	124	0.5	0.016129
Gm02	4366651	4366891	240	INS	Chr02	4332437	4332680	2585	243	0.00833333	0.00823045
Gm02	4533479	4535403	1924	INS	Chr02	4497424	4499501	2591	2077	0.0010395	0.000962927
Gm02	4708582	4708606	24	INS	Chr02	4659234	4659374	2597	140	0.0833333	0.0142857
Gm02	4806996	4807298	302	INS	Chr02	4748093	4749408	2602	1315	0.00662252	0.00152091
Gm02	4817111	4817111	0	INS	Chr02	4759220	4759336	2604	116	2	0.0172414
Gm02	4852862	4853057	195	INS	Chr02	4793454	4793684	2606	230	0.0102564	0.00869565
Gm02	4903885	4903885	0	INS	Chr02	4844102	4844988	2611	886	2	0.00225734
Gm02	4976252	4976252	0	INS	Chr02	4916134	4916475	2622	341	1	0.00293255
Gm02	5000646	5001559	913	INS	Chr02	4940406	4941442	2623	1036	0.00219058	0.0019305
Gm02	5066401	5066502	101	INS	Chr02	5006089	5006307	2630	218	0.019802	0.00917431
Gm02	5092027	5092038	11	INS	Chr02	5031834	5031946	2631	112	0.181818	0.0178571
Gm02	5124371	5124473	102	INS	Chr02	5064188	5064543	2632	355	0.0196078	0.0056338
Gm02	5320602	5320829	227	INS	Chr02	5257839	5258329	2644	490	0.00881057	0.00408163
Gm02	5322332	5323806	1474	INS	Chr02	5259848	5289896	2645	30048	0.00135685	1.98063
Gm02	5455793	5455894	101	INS	Chr02	5421841	5422005	2646	164	0.019802	0.0121951
Gm02	5458903	5459014	111	INS	Chr02	5425012	5425755	2647	743	0.018018	0.00269179
Gm02	5486766	5486766	0	INS	Chr02	5453510	5453763	2649	253	2	0.00790514
Gm02	5590135	5590135	0	INS	Chr02	5546171	5546405	2657	234	2	0.00854701
Gm02	5609114	5609161	47	INS	Chr02	5565242	5567011	2659	1769	0.0425532	0.00113058
Gm02	5615105	5615105	0	INS	Chr02	5571907	5572666	2663	759	2	0.00263505
Gm02	5699363	5699479	116	INS	Chr02	5655530	5655650	2667	120	0.0172414	0.0166667
Gm02	5700740	5700740	0	INS	Chr02	5656911	5670083	2669	13172	2	1.00015
Gm02	5737682	5737947	265	INS	Chr02	5707037	5707678	2670	641	0.00754717	0.00312012
Gm02	5900812	5900812	0	INS	Chr02	5870455	5870516	2671	61	2	0.0327869
Gm02	5924827	5924828	1	INS	Chr02	5894578	5894690	2672	112	2	0.0178571
Gm02	5952953	5955453	2500	INS	Chr02	5922719	5925830	2675	3111	0.0008	0.00064288
Gm02	5962315	5962315	0	INS	Chr02	5932602	5932754	2679	152	2	0.0131579
Gm02	5965521	5965522	1	INS	Chr02	5935992	5936271	2680	279	2	0.00716846
Gm02	6005160	6005262	102	INS	Chr02	5975888	5976053	2681	165	0.0196078	0.0121212
Gm02	6054532	6054532	0	INS	Chr02	6025309	6025609	2684	300	2	0.00666667
Gm02	6208136	6208237	101	INS	Chr02	6174611	6175739	2692	1128	0.019802	0.00177305
Gm02	6274302	6274302	0	INS	Chr02	6241807	6241878	2694	71	2	0.028169
Gm02	6320649	6320649	0	INS	Chr02	6291619	6291789	2699	170	2	0.0117647
Gm02	6824603	6824603	0	INS	Chr02	6788135	6788248	2732	113	2	0.0176991
Gm02	6849547	6849547	0	INS	Chr02	6811625	6814205	2737	2580	2	0.000775194
Gm02	6901148	6901148	0	INS	Chr02	6865807	6865878	2740	71	2	0.028169
Gm02	6922482	6922911	429	INS	Chr02	6887252	6887788	2741	536	0.004662	0.00373134
Gm02	7011259	7011259	0	INS	Chr02	6975903	6975967	2746	64	2	0.03125
Gm02	7059087	7059087	0	INS	Chr02	7023702	7034419	2750	10717	2	1.80648
Gm02	7085002	7085002	0	INS	Chr02	7060249	7064704	2754	4455	2	1.89338
Gm02	7109445	7109445	0	INS	Chr02	7089058	7090352	2759	1294	2	0.0015456
Gm02	7270501	7270618	117	INS	Chr02	7250072	7250683	2769	611	0.017094	0.00327332
Gm02	7354381	7354849	468	INS	Chr02	7325288	7326136	2772	848	0.0042735	0.00235849
Gm02	7428690	7428690	0	INS	Chr02	7399478	7400258	2774	780	2	0.0025641
Gm02	7458599	7459706	1107	INS	Chr02	7430192	7433649	2775	3457	0.00180668	0.000578536
Gm02	7487752	7487752	0	INS	Chr02	7461656	7461834	2777	178	2	0.011236
Gm02	7550357	7550357	0	INS	Chr02	7522629	7523479	2783	850	2	0.00235294
Gm02	7597153	7597153	0	INS	Chr02	7569385	7569438	2788	53	2	0.0377358
Gm02	7707769	7709613	1844	INS	Chr02	7679706	7682287	2791	2581	0.0010846	0.000774893
Gm02	7720874	7720874	0	INS	Chr02	7693578	7694668	2793	1090	2	0.00183486
Gm02	7810604	7810604	0	INS	Chr02	7784382	7784735	2794	353	2	0.00566572
Gm02	7830192	7831300	1108	INS	Chr02	7804386	7805580	2797	1194	0.00180505	0.00167504
Gm02	7857821	7857922	101	INS	Chr02	7831814	7832120	2800	306	0.019802	0.00653595
Gm02	8006533	8006533	0	INS	Chr02	7981114	7981361	2808	247	4	0.190283
Gm02	8019250	8019544	294	INS	Chr02	7994092	7996776	2809	2684	0.00680272	0.000745156
Gm02	8241858	8241864	6	INS	Chr02	8217543	8217753	2818	210	0.333333	0.00952381
Gm02	8539673	8539774	101	INS	Chr02	8515795	8516090	2828	295	0.019802	0.00677966
Gm02	8606090	8606091	1	INS	Chr02	8581839	8583380	2831	1541	2	0.00129786
Gm02	8624072	8624563	491	INS	Chr02	8601365	8603089	2832	1724	0.00407332	0.00116009
Gm02	8955507	8955672	165	INS	Chr02	8933769	8934407	2839	638	0.0121212	0.0031348
Gm02	9064733	9064733	0	INS	Chr02	9043465	9044361	2841	896	2	0.00223214
Gm02	9390733	9390733	0	INS	Chr02	9365572	9365835	2846	263	2	0.00760456
Gm02	9750601	9750720	119	INS	Chr02	9725487	9725969	2854	482	0.0168067	0.00414938
Gm02	9887971	9888636	665	INS	Chr02	9860187	9861043	2857	856	0.00300752	0.00233645
Gm02	10055380	10065381	10001	INS	Chr02	10028184	10057504	2859	29320	0.00019998	6.82128e-05
Gm02	10421539	10421643	104	INS	Chr02	10413513	10414247	2861	734	0.0192308	0.0027248
Gm02	10458265	10458367	102	INS	Chr02	10450831	10450948	2863	117	0.0196078	0.017094
Gm02	10463995	10464385	390	INS	Chr02	10456578	10457005	2864	427	0.00512821	0.00468384
Gm02	10532775	10532876	101	INS	Chr02	10524198	10524552	2867	354	0.019802	0.00564972
Gm02	10821135	10821236	101	INS	Chr02	10812696	10812808	2872	112	0.019802	0.0178571
Gm02	10895593	10896401	808	INS	Chr02	10876634	10877631	2880	997	0.00247525	0.00200602
Gm02	10969981	10970082	101	INS	Chr02	10951211	10951364	2881	153	0.019802	0.0130719
Gm02	10993609	10994518	909	INS	Chr02	10974886	10975853	2882	967	0.00220022	0.00206825
Gm02	10996389	10997428	1039	INS	Chr02	10977726	10978769	2883	1043	0.00192493	0.00191755
Gm02	11766811	11767235	424	INS	Chr02	11504416	11504885	2917	469	0.00471698	0.00426439
Gm02	11880861	11880962	101	INS	Chr02	11618515	11618808	2918	293	0.019802	0.00682594
Gm02	11904780	11905045	265	INS	Chr02	11643085	11643896	2920	811	0.00754717	0.00246609
Gm02	11971427	11971846	419	INS	Chr02	11707889	11708377	2923	488	0.00477327	0.00409836
Gm02	11999916	12000035	119	INS	Chr02	11736447	11736905	2924	458	0.0168067	0.00436681
Gm02	12192727	12192828	101	INS	Chr02	11929484	11929644	2931	160	0.019802	0.0125
Gm02	12339974	12340075	101	INS	Chr02	12076624	12076785	2934	161	0.019802	0.0124224
Gm02	12365397	12365397	0	INS	Chr02	12102037	12102174	2935	137	2	0.0145985
Gm02	12399571	12399571	0	INS	Chr02	12136460	12137133	2937	673	2	0.00297177
Gm02	12429851	12429851	0	INS	Chr02	12165659	12165713	2944	54	2	0.037037
Gm02	12617858	12617959	101	INS	Chr02	12352106	12353054	2950	948	0.019802	0.0021097
Gm02	12723045	12723045	0	INS	Chr02	12458787	12459416	2956	629	2	0.00158983
Gm02	12745892	12745993	101	INS	Chr02	12476565	12476704	2958	139	0.019802	0.0143885
Gm02	12756872	12756973	101	INS	Chr02	12490001	12490928	2961	927	0.019802	0.0021575
Gm02	12762169	12762169	0	INS	Chr02	12496123	12496276	2963	153	2	0.0130719
Gm02	12825732	12826517	785	INS	Chr02	12559970	12560836	2964	866	0.00254777	0.00230947
Gm02	12879459	12879459	0	INS	Chr02	12613875	12614781	2969	906	2	0.527594
Gm02	13115970	13116696	726	INS	Chr02	12850763	12851663	2977	900	0.00275482	0.00222222
Gm02	13178347	13178467	120	INS	Chr02	12913308	12913661	2978	353	0.0166667	0.00566572
Gm02	13302429	13302530	101	INS	Chr02	13037605	13038140	2979	535	0.019802	0.00373832
Gm02	13308035	13308036	1	INS	Chr02	13043643	13044479	2980	836	2	0.00239234
Gm02	13417947	13418068	121	INS	Chr02	13154387	13154596	2981	209	0.0165289	0.00956938
Gm02	13489762	13489762	0	INS	Chr02	13226263	13226456	2986	193	1	0.00518135
Gm02	13547508	13548269	761	INS	Chr02	13336980	13338453	3004	1473	0.00262812	0.00135777
Gm02	13550710	13550811	101	INS	Chr02	13340894	13341133	3005	239	0.019802	0.0083682
Gm02	13558343	13558687	344	INS	Chr02	13348664	13349055	3006	391	0.00581395	0.00511509
Gm02	13647261	13647261	0	INS	Chr02	13437535	13438798	3009	1263	1	0.00158353
Gm02	13656219	13656848	629	INS	Chr02	13441915	13442626	3010	711	0.00317965	0.00281294
Gm02	13686168	13686400	232	INS	Chr02	13474090	13474749	3013	659	0.00862069	0.0030349
Gm02	13687721	13687721	0	INS	Chr02	13476068	13476166	3014	98	2	0.0204082
Gm02	13723614	13723614	0	INS	Chr02	13512055	13513488	3016	1433	2	0.00139567
Gm02	13848148	13848388	240	INS	Chr02	13637321	13638190	3019	869	0.00833333	0.0023015
Gm02	13917224	13917326	102	INS	Chr02	13706464	13706729	3021	265	0.0196078	0.00754717
Gm02	13939585	13939586	1	INS	Chr02	13728948	13729156	3024	208	2	0.00961538
Gm02	14013123	14013224	101	INS	Chr02	13801161	13804562	3030	3401	0.019802	0.000588062
Gm02	14055822	14055923	101	INS	Chr02	13843808	13844193	3037	385	0.019802	0.00519481
Gm02	14374890	14374991	101	INS	Chr02	14156161	14156356	3052	195	0.019802	0.0102564
Gm02	14396402	14396402	0	INS	Chr02	14177740	14177926	3053	186	2	0.0107527
Gm02	14407048	14407149	101	INS	Chr02	14188463	14188591	3054	128	0.019802	0.015625
Gm02	14414433	14414433	0	INS	Chr02	14196775	14197052	3057	277	2	0.00361011
Gm02	14506643	14506704	61	INS	Chr02	14289163	14289344	3060	181	0.0327869	0.0110497
Gm02	14524371	14524371	0	INS	Chr02	14307069	14307130	3062	61	2	0.0327869
Gm02	14606695	14606695	0	INS	Chr02	14389464	14390325	3066	861	1	0.00116144
Gm02	14671302	14671527	225	INS	Chr02	14447571	14447835	3069	264	0.00888889	1.01136
Gm02	14689877	14690009	132	INS	Chr02	14466209	14466590	3070	381	0.0151515	0.00524934
Gm02	14705637	14705645	8	INS	Chr02	14482110	14484404	3071	2294	0.25	0.00087184
Gm02	14721807	14721908	101	INS	Chr02	14500658	14500783	3072	125	0.019802	0.016
Gm02	14750891	14750891	0	INS	Chr02	14529609	14529699	3075	90	2	0.0222222
Gm02	14755841	14757499	1658	INS	Chr02	14534655	14536389	3076	1734	0.00120627	0.0011534
Gm02	14774949	14775876	927	INS	Chr02	14550644	14552347	3078	1703	0.0021575	0.0011744
Gm02	14779489	14779489	0	INS	Chr02	14555961	14561785	3081	5824	2	0.669643
Gm02	14886356	14886874	518	INS	Chr02	14671288	14673164	3083	1876	0.003861	0.0010661
Gm02	14933824	14933834	10	INS	Chr02	14720085	14721322	3084	1237	0.2	0.00161681
Gm02	15002110	15002212	102	INS	Chr02	14786719	14786866	3089	147	0.0196078	0.0136054
Gm02	15063887	15063887	0	INS	Chr02	14848446	14849044	3093	598	2	0.00334448
Gm02	15273895	15273895	0	INS	Chr02	15058369	15058451	3097	82	2	0.0243902
Gm02	15502922	15503026	104	INS	Chr02	15287602	15288057	3098	455	0.0192308	0.0043956
Gm02	15611002	15611979	977	INS	Chr02	15399338	15400535	3101	1197	0.00204708	0.00167084
Gm02	15725823	15726520	697	INS	Chr02	15513749	15514527	3104	778	0.00286944	0.00257069
Gm02	15756617	15756617	0	INS	Chr02	15544630	15544887	3105	257	2	0.0077821
Gm02	15906239	15907435	1196	INS	Chr02	15693491	15695068	3107	1577	0.00167224	0.998098
Gm02	15940288	15940288	0	INS	Chr02	15728025	15733419	3112	5394	3	1.91361
Gm02	15994624	15994624	0	INS	Chr02	15785450	15787016	3116	1566	2	0.00127714
Gm02	16029126	16029128	2	INS	Chr02	15817099	15817211	3120	112	1	0.0178571
Gm02	16037952	16037957	5	INS	Chr02	15832006	15833091	3123	1085	0.4	0.00184332
Gm02	16129986	16129986	0	INS	Chr02	15915044	15918594	3129	3550	2	0.00056338
Gm02	16196775	16196775	0	INS	Chr02	15985120	15988188	3139	3068	2	0.000325945
Gm02	16214653	16214653	0	INS	Chr02	16020949	16021193	3146	244	2	0.00819672
Gm02	16219922	16219922	0	INS	Chr02	16027288	16031203	3150	3915	2	0
Gm02	16249513	16249513	0	INS	Chr02	16072797	16077535	3152	4738	2	0.000422119
Gm02	16264687	16264687	0	INS	Chr02	16096540	16098801	3154	2261	2	0.000884564
Gm02	16311360	16311513	153	INS	Chr02	16152052	16152311	3159	259	0.0130719	0.00772201
Gm02	16368177	16368177	0	INS	Chr02	16194506	16195486	3163	980	2	0.00204082
Gm02	16470444	16470444	0	INS	Chr02	16199431	16199731	3167	300	2	0.00666667
Gm02	16525602	16525602	0	INS	Chr02	16254915	16259346	3169	4431	2	0.000451365
Gm02	16543288	16545590	2302	INS	Chr02	16277690	16287700	3171	10010	0.00086881	0.422378
Gm02	16571191	16571191	0	INS	Chr02	16313340	16314691	3173	1351	2	0.00148038
Gm02	16638282	16638282	0	INS	Chr02	16381592	16392013	3178	10421	2	0.488437
Gm02	16653009	16653181	172	INS	Chr02	16427525	16431593	3181	4068	0.00581395	0.000491642
Gm02	16736117	16736122	5	INS	Chr02	16505916	16506118	3187	202	0.4	0.00990099
Gm02	16738181	16739560	1379	INS	Chr02	16508178	16526729	3188	18551	0.00145033	4.08512
Gm02	16945395	16945638	243	INS	Chr02	16728295	16729296	3200	1001	0.00823045	0.001998
Gm02	16948192	16948192	0	INS	Chr02	16731850	16731946	3201	96	2	0.0208333
Gm02	16968897	16968897	0	INS	Chr02	16752592	16753182	3203	590	2	0.00338983
Gm02	17007390	17007390	0	INS	Chr02	16784512	16803081	3209	18569	2	1.71
Gm02	17022986	17023436	450	INS	Chr02	16818665	16821402	3210	2737	0.00444444	0.000730727
Gm02	17057468	17057468	0	INS	Chr02	16855219	16860082	3213	4863	2	0.000411269
Gm02	17058703	17058703	0	INS	Chr02	16862026	16866103	3216	4077	2	0.000245278
Gm02	17330227	17330406	179	INS	Chr02	17105935	17106144	3231	209	0.0111732	0.00956938
Gm02	17332580	17332580	0	INS	Chr02	17108316	17108807	3233	491	2	0.00407332
Gm02	17337251	17337251	0	INS	Chr02	17113478	17130857	3235	17379	2	6.11842
Gm02	17411357	17411358	1	INS	Chr02	17202516	17202878	3246	362	2	0.00276243
Gm02	17519696	17519696	0	INS	Chr02	17293895	17295347	3252	1452	2	1.00138
Gm02	17533274	17533274	0	INS	Chr02	17320391	17337205	3258	16814	2	4.40579
Gm02	17542839	17542839	0	INS	Chr02	17347497	17354969	3260	7472	1	0.000267666
Gm02	17599538	17599538	0	INS	Chr02	17404495	17404710	3261	215	2	0.00930233
Gm02	17709835	17709835	0	INS	Chr02	17506405	17524103	3265	17698	2	1.27116
Gm02	17714775	17715329	554	INS	Chr02	17529046	17529632	3266	586	0.00361011	0.00341297
Gm02	17790500	17790500	0	INS	Chr02	17598268	17606749	3273	8481	2	1.34925
Gm02	17852241	17852241	0	INS	Chr02	17668497	17686671	3275	18174	2	0.000110047
Gm02	17902839	17902839	0	INS	Chr02	17726195	17726373	3278	178	2	0.011236
Gm02	17942816	17942816	0	INS	Chr02	17766358	17767191	3280	833	2	0.00240096
Gm02	17978296	17979291	995	INS	Chr02	17794494	17801939	3285	7445	0.00201005	0.000134318
Gm02	18010197	18010197	0	INS	Chr02	18398355	18410346	3292	11991	1	0.496789
Gm02	18017434	18017434	0	INS	Chr02	18422960	18423477	3296	517	2	0.00193424
Gm02	18135439	18135439	0	INS	Chr02	18526546	18532070	3300	5524	2	1.00036
Gm02	18254620	18254963	343	INS	Chr02	18655376	18655737	3310	361	0.0058309	0.00554017
Gm02	18398514	18398514	0	INS	Chr02	18798405	18814478	3316	16073	2	0.389597
Gm02	18514266	18514266	0	INS	Chr02	18912737	18913539	3328	802	2	0.00249377
Gm02	18614295	18614295	0	INS	Chr02	19013427	19022780	3331	9353	2	0.000213835
Gm02	18654368	18654368	0	INS	Chr02	19062695	19063887	3334	1192	2	0.00167785
Gm02	18777416	18777416	0	INS	Chr02	19186586	19186643	3339	57	2	0.0350877
Gm02	18871333	18871333	0	INS	Chr02	19247432	19248284	3349	852	2	0.00117371
Gm02	18889226	18889226	0	INS	Chr02	19281511	19281818	3354	307	2	0.00651466
Gm02	18899555	18899555	0	INS	Chr02	19292171	19306858	3357	14687	2	6.80874e-05
Gm02	18907276	18907282	6	INS	Chr02	19320438	19320541	3358	103	0.333333	0.0194175
Gm02	18915767	18915767	0	INS	Chr02	19329021	19329120	3359	99	2	0.020202
Gm02	18933822	18933824	2	INS	Chr02	19347177	19348068	3360	891	1	0.00224467
Gm02	18947250	18947250	0	INS	Chr02	19361494	19367311	3363	5817	2	0.00017191
Gm02	18994938	18995169	231	INS	Chr02	19429017	19430893	3367	1876	0.00865801	0.0010661
Gm02	19070735	19070738	3	INS	Chr02	19478965	19480007	3375	1042	0.666667	0.00191939
Gm02	19107095	19107095	0	INS	Chr02	19522621	19530645	3381	8024	2	1.00012
Gm02	19131383	19131383	0	INS	Chr02	19543872	19567722	3391	23850	2	4.19287e-05
Gm02	19151679	19151691	12	INS	Chr02	19591406	19600495	3395	9089	0.166667	0.000220046
Gm02	19231815	19231815	0	INS	Chr02	19671285	19674466	3404	3181	2	1.00094
Gm02	19253421	19253421	0	INS	Chr02	19698330	19714003	3407	15673	2	0.150769
Gm02	19308152	19308253	101	INS	Chr02	19773228	19773372	3408	144	0.019802	0.0138889
Gm02	19326038	19326040	2	INS	Chr02	19791107	19791464	3409	357	1	0.00560224
Gm02	19363720	19363722	2	INS	Chr02	19813224	19813586	3414	362	1	0.00552486
Gm02	19520373	19520373	0	INS	Chr02	19940154	19943587	3432	3433	2	0
Gm02	19565363	19565363	0	INS	Chr02	20012334	20014546	3440	2212	2	0.00045208
Gm02	19608382	19608382	0	INS	Chr02	20044369	20048701	3444	4332	2	0.000461681
Gm02	19686014	19686107	93	INS	Chr02	20149642	20149846	3455	204	0.0215054	0.00980392
Gm02	19702849	19703086	237	INS	Chr02	20166607	20166846	3456	239	0.00843882	0.0083682
Gm02	19715479	19715479	0	INS	Chr02	20179237	20180270	3458	1033	2	0.00193611
Gm02	20411558	20411558	0	INS	Chr02	17852511	17855588	3463	3077	2	0.000649984
Gm02	20414092	20414169	77	INS	Chr02	17859429	17861609	3464	2180	0.025974	0.000917431
Gm02	20557593	20557594	1	INS	Chr02	18003021	18003129	3471	108	2	0.0185185
Gm02	20734865	20734865	0	INS	Chr02	18175101	18175162	3476	61	2	0.0327869
Gm02	20749167	20749548	381	INS	Chr02	18189462	18192634	3477	3172	0.00524934	0.000630517
Gm02	20856921	20856926	5	INS	Chr02	18282521	18283362	3482	841	0.4	0.00237812
Gm02	20929208	20929341	133	INS	Chr02	18355718	18356266	3483	548	0.0150376	0.00364964
Gm02	20943309	20945231	1922	INS	Chr02	18370228	18376719	3486	6491	0.000520291	0.000308119
Gm02	21077425	21077425	0	INS	Chr02	21726667	21727034	3505	367	0	0.00544959
Gm02	21079501	21080375	874	INS	Chr02	21723473	21724558	3506	1085	0.00228833	0.00184332
Gm02	21083743	21083743	0	INS	Chr02	21719949	21720105	3508	156	0	0.0128205
Gm02	21086908	21086908	0	INS	Chr02	21692045	21693116	3513	1071	0	1.00093
Gm02	21086908	21086908	0	INS	Chr02	21697216	21697297	3515	81	0	0
Gm02	21253780	21253780	0	INS	Chr02	20699934	20709214	3536	9280	2	3.51778
Gm02	21266646	21266779	133	INS	Chr02	20722101	20722461	3537	360	0.0150376	0.00555556
Gm02	21296584	21296588	4	INS	Chr02	20752229	20752333	3538	104	0.5	0.0192308
Gm02	21346319	21346340	21	INS	Chr02	20802031	20802222	3539	191	0.0952381	0.0104712
Gm02	21406979	21406990	11	INS	Chr02	20863333	20866275	3544	2942	0.181818	0.00067981
Gm02	21409678	21409678	0	INS	Chr02	20868965	20872878	3546	3913	2	1.00026
Gm02	21435400	21435400	0	INS	Chr02	20898609	20898672	3548	63	2	0.031746
Gm02	21556337	21556337	0	INS	Chr02	21008369	21008818	3554	449	2	0.00445434
Gm02	21578439	21578439	0	INS	Chr02	21030971	21036136	3556	5165	2	0.000387222
Gm02	21662505	21662505	0	INS	Chr02	21102472	21108009	3564	5537	2	1.95936
Gm02	21817312	21817312	0	INS	Chr02	21258381	21279623	3572	21242	2	0.551784
Gm02	21829843	21829843	0	INS	Chr02	21292139	21292390	3574	251	2	0.00796813
Gm02	21836975	21836975	0	INS	Chr02	21299006	21299182	3578	176	2	0.0113636
Gm02	21887134	21887135	1	INS	Chr02	21334111	21335078	3585	967	2	0.00206825
Gm02	21898444	21898545	101	INS	Chr02	21346397	21346723	3586	326	0.019802	0.00613497
Gm02	22022366	22022366	0	INS	Chr02	21437101	21438064	3598	963	2	0.00207684
Gm02	22035183	22035183	0	INS	Chr02	21450872	21470453	3600	19581	2	0.00010214
Gm02	22112947	22112947	0	INS	Chr02	21547988	21548392	3603	404	1	0.0049505
Gm02	22134447	22134447	0	INS	Chr02	21555024	21564401	3612	9377	1	5.00064
Gm02	22167375	22167375	0	INS	Chr02	20642865	20645323	3619	2458	1	1.00041
Gm02	22397054	22397054	0	INS	Chr02	21838290	21838528	3640	238	2	0.00840336
Gm02	22425504	22425504	0	INS	Chr02	21858365	21861740	3644	3375	2	0.000592593
Gm02	22542751	22542751	0	INS	Chr02	21961213	21964059	3650	2846	2	0.000702741
Gm02	22621623	22622428	805	INS	Chr02	22026757	22046529	3660	19772	0.00248447	0.478454
Gm02	23092019	23093273	1254	INS	Chr02	31023101	31025202	3707	2101	0.0015949	0.000951928
Gm02	23114723	23114723	0	INS	Chr02	30996747	30996837	3710	90	0	0.0111111
Gm02	23189540	23189540	0	INS	Chr02	30911759	30921086	3715	9327	0	5.1872
Gm02	23208035	23208035	0	INS	Chr02	30892548	30893641	3718	1093	0	0.00182983
Gm02	23213711	23213711	0	INS	Chr02	30872975	30873085	3725	110	0	0
Gm02	23282755	23282755	0	INS	Chr02	30793378	30799900	3729	6522	0	1.50583
Gm02	23425606	23425606	0	INS	Chr02	22203642	22207930	3739	4288	2	0.000233209
Gm02	23511900	23511900	0	INS	Chr02	22276974	22284555	3750	7581	2	0.000131909
Gm02	23542204	23542204	0	INS	Chr02	22357880	22359561	3752	1681	2	0.00118977
Gm02	23817505	23817505	0	INS	Chr02	20400465	20409756	3764	9291	2	0.723388
Gm02	23917172	23917172	0	INS	Chr02	20508249	20509704	3770	1455	2	0.00137457
Gm02	23943952	23943952	0	INS	Chr02	20536178	20536280	3776	102	1	0.0294118
[truncated: 20,388 more rows]

## Sheet: Inversion
INV
REF_CHROM	REF_START	REF_END	SV_TYPE	Q_CHROM	Q_START	Q_END	ID	REF_LEN	Q_LEN	Comments	Name of inversion
Gm01	16326238	18578219	INV + translocatoin	Chr01	13423730	15763664	2	2251981	2339934	multiple cosegregating markers
Gm01	13985783	14716396	INV	Chr01	15778850	16515707	0	730613	736857	multiple cosegregating markers
Gm01	15263312	15677008	INV	Chr01	16757412	17244669	1	413696	487257	multiple cosegregating markers
Gm01	21084513	22491452	INV	Chr01	19778809	21218685	3	1406939	1439876	multiple cosegregating markers
Gm01	37274240	39014933	INV + translocatoin	Chr01	31902079	33668601	7	1740693	1766522	multiple cosegregating markers
Gm02	18722421	19463266	INV	Chr02	19131985	19893476	8	740845	761491	multiple cosegregating markers
Gm02	20976175	21172713	INV	Chr02	21564400	21817749	9	196538	253349	multiple cosegregating markers
Gm02	23044991	25489963	INV + translocatoin	Chr02	28620366	31053856	10	2444972	2433490	Multiple cosegregating markers
Gm02	32583003	34114663	INV	Chr02	31500312	33062026	12	1531660	1561714	multiple cosegregating markers
Gm02	34132166	35662686	INV	Chr02	33062127	34612214	13	1530520	1550087	multiple cosegregating markers
Gm03	11905168	12405561	INV	Chr03	13084655	13626624	14	500393	541969	multiple cosegregating markers
Gm03	16144769	17546671	INV	Chr03	13638305	15015736	16	1401902	1377431	multiple cosegregating markers
Gm03	20464690	21412592	INV	Chr03	19924251	20892824	18	947902	968573	multiple cosegregating markers
Gm04	23598100	24134056	INV	Chr04	23988111	24532302	21	535956	544191	multiple cosegregating markers
Gm04	34489146	35930844	INV + translocatoin	Chr04	25807661	26912944	26	1441698	1105283	multiple cosegregating markers
Gm04	37875773	38435566	INV + translocatoin	Chr04	29985894	30568681	27	559793	582787	multiple cosegregating markers
Gm04	24700315	25224588	INV + translocatoin	Chr04	30570347	31096625	22	524273	526278	multiple cosegregating markers
Gm04	29742026	30959147	INV + translocatoin	Chr04	31096726	32321448	23	1217121	1224722	multiple cosegregating markers
Gm05	14136743	15745809	INV	Chr05	13600004	15254255	30	1609066	1654251	multiple cosegregating markers
Gm05	20128133	20752026	INV + translocatoin	Chr05	15256776	15881358	32	623893	624582	multiple cosegregating markers
Gm05	15772100	16068406	INV + translocatoin	Chr05	16581606	16889115	31	296306	307509	multiple cosegregating markers
Gm05	13824173	14031254	INV + translocatoin	Chr05	16889216	17097408	29	207081	208192	multiple cosegregating markers
Gm05	13301715	13817835	INV + translocatoin	Chr05	17106211	17638323	28	516120	532112	multiple cosegregating markers
Gm06	21362801	21738310	INV	Chr06	21340768	21720756	33	375509	379988	multiple cosegregating markers
Gm06	27807260	28164530	INV + translocatoin	Chr06	24152718	24627346	38	357270	474628	multiple cosegregating markers
Gm06	23967013	24941514	INV + translocatoin	Chr06	25937847	26702680	35	974501	764833	multiple cosegregating markers
Gm06	25090579	25128747	INV + translocatoin	Chr06	26862014	26917920	36	38168	55906	multiple cosegregating markers
Gm06	30153111	31315615	INV	Chr06	29255725	30477660	40	1162504	1221935	multiple cosegregating markers
Gm06	34791042	37859048	INV	Chr06	32843671	35896124	41	3068006	3052453	multiple cosegregating markers
Gm07	24214572	24422144	INV + translocatoin	Chr07	22150958	22363897	43	207572	212939	multiple cosegregating markers
Gm07	32097297	32338871	INV + translocatoin	Chr07	25796239	26028994	45	241574	232755	multiple cosegregating markers
Gm07	29210133	30612773	INV + translocatoin	Chr07	26031503	27562478	44	1402640	1530975	multiple cosegregating markers
Gm07	23911787	24180837	INV + translocatoin	Chr07	27679632	27961096	42	269050	281464	multiple cosegregating markers
Gm07	32397949	32685231	INV + translocatoin	Chr07	30158259	30435045	46	287282	276786	multiple cosegregating markers
Gm08	25866988	26556124	INV	Chr08	26715089	27437931	50	689136	722842	multiple cosegregating markers
Gm09	14168488	16100581	INV	Chr09	13457364	15442062	55	1932093	1984698	multiple cosegregating markers
Gm09	23020487	23187084	INV + translocatoin	Chr09	21433287	21547701	56	166597	114414	multiple cosegregating markers
Gm09	26504401	27156228	INV + translocatoin	Chr09	22212179	22879132	57	651827	666953	multiple cosegregating markers
Gm10	5631545	5762238	INV	Chr10	5588048	5718786	58	130693	130738	multiple cosegregating markers
Gm10	8462145	11633593	INV	Chr10	8075422	11391662	60	3171448	3316240	multiple cosegregating markers
Gm10	11661440	13039992	INV	Chr10	11392833	12742999	61	1378552	1350166	multiple cosegregating markers
Gm10	17783994	18509611	INV + translocatoin	Chr10	12747901	13455945	63	725617	708044	multiple cosegregating markers
Gm10	21300763	22299898	INV + translocatoin	Chr10	19228802	20267325	65	999135	1038523	multiple cosegregating markers
Gm10	20942816	21290347	INV + translocatoin	Chr10	24934609	25336803	64	347531	402194	multiple cosegregating markers
Gm10	27056585	27827758	INV + translocatoin	Chr10	25342349	26119885	67	771173	777536	multiple cosegregating markers
Gm11	20284281	20543204	INV + translocatoin	Chr11	24620505	24888669	70	258923	268164	multiple cosegregating markers
Gm11	21020723	21681288	INV + translocatoin	Chr11	25159369	25827569	71	660565	668200	multiple cosegregating markers
Gm11	21742361	24357449	INV + translocatoin	Chr11	27143300	29827444	72	2615088	2684144	multiple cosegregating markers
Gm12	24712263	24976549	INV + translocatoin	Chr12	22926117	23189206	78	264286	263089	multiple cosegregating markers
Gm12	22889713	23686913	INV + translocatoin	Chr12	23665449	24479486	75	797200	814037	multiple cosegregating markers
Gm12	26741960	27216550	INV + translocatoin	Chr12	24545533	25037652	80	474590	492119	multiple cosegregating markers
Gm12	27571492	28523900	INV + translocatoin	Chr12	25073362	26013190	81	952408	939828	multiple cosegregating markers
Gm12	24239760	24666164	INV + translocatoin	Chr12	26013291	26444849	77	426404	431558	multiple cosegregating markers
Gm12	25632387	25959155	INV + translocatoin	Chr12	26444950	26781976	79	326768	337026	multiple cosegregating markers
Gm13	7312012	7861343	INV + translocatoin	Chr13	3496856	4198703	88	549331	701847	multiple cosegregating markers
Gm13	6711485	7037337	INV + translocatoin	Chr13	4198804	4518672	86	325852	319868	multiple cosegregating markers
Gm13	4435402	6207577	INV	Chr13	4573751	6385075	85	1772175	1811324	multiple cosegregating markers
Gm13	7064666	7300278	INV + translocatoin	Chr13	9033864	9308982	87	235612	275118	multiple cosegregating markers
Gm14	26142861	26978040	INV + translocatoin	Chr14	16373134	17225925	97	835179	852791	multiple cosegregating markers
Gm14	15329069	17276240	INV + translocatoin	Chr14	30514087	32477349	95	1947171	1963262	multiple cosegregating markers
Gm14	17320006	19741168	INV + translocatoin	Chr14	34391219	36836450	96	2421162	2445231	multiple cosegregating markers
Gm14	36815740	37610921	INV	Chr14	36836551	37625941	99	795181	789390	multiple cosegregating markers
Gm14	37687756	38370990	INV	Chr14	37627549	38311012	100	683234	683463	multiple cosegregating markers
Gm15	20428824	20877300	INV	Chr15	20362045	20818237	101	448476	456192	multiple cosegregating markers
Gm15	26792922	27583245	INV + translocatoin	Chr15	27681563	28552708	104	790323	871145	multiple cosegregating markers
Gm15	27652200	28093320	INV + translocatoin	Chr15	28552809	28996639	105	441120	443830	multiple cosegregating markers
Gm15	26625516	26710074	INV + translocatoin	Chr15	28996740	29081288	103	84558	84548	multiple cosegregating markers
Gm15	28414984	28632648	INV + translocatoin	Chr15	29081389	29300992	106	217664	219603	multiple cosegregating markers
Gm15	24032521	25253711	INV + translocatoin	Chr15	29301460	30536001	102	1221190	1234541	multiple cosegregating markers
Gm15	34404257	35506847	INV + translocatoin	Chr15	32940414	34050677	109	1102590	1110263	multiple cosegregating markers
Gm16	13459184	13866917	INV	Chr16	13708142	14139105	115	407733	430963	multiple cosegregating markers
Gm16	16329860	17198760	INV + translocatoin	Chr16	14249707	15112634	118	868900	862927	multiple cosegregating markers
Gm16	13901401	15525017	INV + translocatoin	Chr16	15290028	17083149	116	1623616	1793121	multiple cosegregating markers
Gm16	13285835	13454382	INV + translocatoin	Chr16	19470950	19665072	114	168547	194122	multiple cosegregating markers
Gm16	35401438	35475810	INV	Chr16	34566817	34641194	122	74372	74377	multiple cosegregating markers
Gm16	35372108	35400465	INV	Chr16	34641855	34670214	121	28357	28359	multiple cosegregating markers
Gm17	28123619	28456971	INV	Chr17	28344129	28642279	127	333352	298150	multiple cosegregating markers
Gm17	29637096	31907716	INV	Chr17	28642380	31003445	129	2270620	2361065	multiple cosegregating markers
Gm18	36754800	37296213	INV + translocatoin	Chr18	20948344	21284138	140	541413	335794	multiple cosegregating markers
Gm18	30366614	31184253	INV + translocatoin	Chr18	21284239	22266653	134	817639	982414	multiple cosegregating markers
Gm18	28022619	28587587	INV + translocatoin	Chr18	22315922	22961313	132	564968	645391	multiple cosegregating markers
Gm18	33075324	33570306	INV + translocatoin	Chr18	24747126	25063769	137	494982	316643	multiple cosegregating markers
Gm18	31228979	31991564	INV + translocatoin	Chr18	25101903	25963963	135	762585	862060	multiple cosegregating markers
Gm18	32090746	32219977	INV + translocatoin	Chr18	26033326	26135506	136	129231	102180	multiple cosegregating markers
Gm18	28634342	29484923	INV	Chr18	28401382	29229901	133	850581	828519	multiple cosegregating markers
Gm18	33723182	33833492	INV + translocatoin	Chr18	34056257	34173874	138	110310	117617	multiple cosegregating markers
Gm18	37568131	38555304	INV + translocatoin	Chr18	34257252	35260840	141	987173	1003588	multiple cosegregating markers
Gm18	39504883	40700720	INV + translocatoin	Chr18	38654875	39886502	142	1195837	1231627	multiple cosegregating markers
Gm18	42248872	42714049	INV + translocatoin	Chr18	39886603	40352132	143	465177	465529	multiple cosegregating markers
Gm19	16844075	17425840	INV + translocatoin	Chr19	9708036	10344828	150	581765	636792	multiple cosegregating markers
Gm19	10784185	12148629	INV	Chr19	11400147	12764798	146	1364444	1364651	multiple cosegregating markers
Gm19	18359871	18472289	INV + translocatoin	Chr19	12900041	13050297	151	112418	150256	multiple cosegregating markers
Gm19	18665403	18826479	INV + translocatoin	Chr19	15310989	15472280	152	161076	161291	multiple cosegregating markers
Gm19	21427913	22910176	INV + translocatoin	Chr19	15740662	16749543	155	1482263	1008881	multiple cosegregating markers
Gm19	20796679	21415882	INV + translocatoin	Chr19	26624276	27181296	154	619203	557020	multiple cosegregating markers
Gm19	13081961	14110721	INV + translocatoin	Chr19	27277236	28357958	147	1028760	1080722	multiple cosegregating markers
Gm20	12684935	12972358	INV + translocatoin	Chr20	13431448	13714244	159	287423	282796	multiple cosegregating markers
Gm20	10111452	10365878	INV + translocatoin	Chr20	13718214	13945478	157	254426	227264	multiple cosegregating markers
Gm20	15561809	16215388	INV	Chr20	14927598	15602513	161	653579	674915	multiple cosegregating markers
Gm20	10370852	10581449	INV + translocatoin	Chr20	15603254	15823320	158	210597	220066	multiple cosegregating markers
Gm20	9739020	10026331	INV + translocatoin	Chr20	16074457	16414411	156	287311	339954	multiple cosegregating markers
Gm20	18275184	19570004	INV	Chr20	17905022	19215697	162	1294820	1310675	multiple cosegregating markers
Gm20	13638751	14082801	INV + translocatoin	Chr20	20090526	20544849	160	444050	454323	multiple cosegregating markers
Gm20	26156607	26475333	INV	Chr20	24471075	24893240	164	318726	422165	multiple cosegregating markers
Gm01	29825773	31563950	INV	Chr01	25948606	28440030	4	1738177	2491424	multiple cosegregating markers
Gm10	15019243	15871942	INV	Chr10	14567790	15482900	62	852699	915110	multiple cosegregating markers
Gm01	31868635	34353221	INV	Chr01	29446136	31895394	5	2484586	2449258	Need to be flipped over; ALLMAPS error supported by genetic markers
Gm02	25491066	31621775	INV	Chr02	22383933	28620369	11	6130709	6236436	Need to be flipped over; ALLMAPS error supported by genetic markers
Gm03	22213095	24939393	INV	Chr03	21681000	24248523	19	2726298	2567523	Need to be flipped over; ALLMAPS error supported by genetic markers
Gm06	28266233	30129824	INV	Chr06	27172140	29254991	39	1863591	2082851	Need to be flipped over; ALLMAPS error supported by genetic markers
Gm13	56	3048789	INV	Chr13	1	3263143	83	3048733	3263142	Need to be flipped over; ALLMAPS error supported by genetic markers
Gm14	27152111	28356406	INV + translocatoin	Chr14	22078109	23346595	98	1204295	1268486	Need to be flipped over; ALLMAPS error supported by genetic markers
Gm15	31069111	31594612	INV + translocatoin	Chr15	25471524	26026160	107	525501	554636	Need to be flipped over; ALLMAPS error supported by genetic markers
Gm15	32067270	33178490	INV + translocatoin	Chr15	30836279	31952192	108	1111220	1115913	Need to be flipped over; ALLMAPS error supported by genetic markers
Gm16	17952372	20209590	INV	Chr16	17083250	19398998	120	2257218	2315748	Need to be flipped over; ALLMAPS error supported by genetic markers
Gm17	31929774	32704984	INV + translocatoin	Chr17	26565610	27349538	130	775210	783928	Need to be flipped over; ALLMAPS error supported by genetic markers
Gm18	34044845	35490026	INV + translocatoin	Chr18	26411981	27887313	139	1445181	1475332	Need to be flipped over; ALLMAPS error supported by genetic markers
Gm20	26603058	29101812	INV	Chr20	24915021	27786162	165	2498754	2871141	Need to be flipped over; ALLMAPS error supported by genetic markers
Gm17	17479911	19950240	INV	Chr17	16817792	19286190	125	2470329	2468398	Need to be flipped over; ALLMAPS error supported by genetic markers; contain scaffold_74 of the Williams 82 assembly
Gm01	34650467	34695989	INV + translocatoin	Chr01	36350375	36392630	6	45522	42255	real	Inv_Chr01_42
Gm03	18224927	18294678	INV	Chr03	17690130	17813999	17	69751	123869	real	Inv_Chr03_124
Gm04	12139560	12236681	INV	Chr04	10840419	10937542	20	97121	97123	real	Inv_Chr04_97
Gm06	25450032	25645016	INV + translocatoin	Chr06	23042145	23174837	37	194984	132692	Real	Inv_Chr06_133
Gm07	34227441	34415006	INV + translocatoin	Chr07	31892160	32092735	47	187565	200575	Real	Inv_Chr07_201
Gm07	34605863	34788807	INV + translocatoin	Chr07	32265100	32475725	48	182944	210625	Real	Inv_Chr07_211
Gm08	8384839	8495614	INV	Chr08	8402482	8508129	49	110775	105647	Real	Inv_Chr08_106
Gm09	13467530	13522590	INV + translocatoin	Chr09	15436539	15491609	54	55060	55070	Real	Inv_Chr09_55
Gm10	7433172	7502481	INV	Chr10	7302448	7368233	59	69309	65785	Real	Inv_Chr10_66
Gm10	25675661	25739327	INV + translocatoin	Chr10	22269517	22333173	66	63666	63656	Real	Inv_Chr10_64
Gm11	7784688	7844785	INV	Chr11	7770209	7829184	68	60097	58975	Real	Inv_Chr11_59
Gm11	10983853	11002447	INV	Chr11	10936536	10955128	69	18594	18592	Real	Inv_Chr11_19
Gm12	1090112	1112750	INV	Chr12	1086922	1109468	74	22638	22546	Real	Inv_Chr12_23
Gm12	35781794	35826476	INV	Chr12	33952390	33997141	82	44682	44751	real	Inv_Chr12_45
Gm13	35864681	35892938	INV	Chr13	36627117	36672245	90	28257	45128	real	Inv_Chr13_45
Gm13	36315040	36333874	INV + translocatoin	Chr13	46070244	46089883	91	18834	19639	real	Inv_Chr13_20
Gm14	2812780	2847562	INV	Chr14	2854339	2889402	92	34782	35063	real	Inv_Chr14_35
Gm14	3364247	3483982	INV	Chr14	3448122	3567472	93	119735	119350	Real	Inv_Chr14_119
Gm14	6790360	6807299	INV	Chr14	6750404	6767344	94	16939	16940	real	Inv_Chr14_17
Gm15	42795781	42830553	INV + translocatoin	Chr15	37407256	37442757	110	34772	35501	Real	Inv_Chr15_36
Gm16	35606055	35619046	INV	Chr16	34181907	34194922	124	12991	13015	real	Inv_Chr16_13
Gm18	6351491	6363392	INV	Chr18	6433946	6445858	131	11901	11912	real	Inv_Chr18_12
Gm18	42941910	43129626	INV + translocatoin	Chr18	38430711	38618482	144	187716	187771	Real	Inv_Chr18_188
Gm19	14444731	14490552	INV + translocatoin	Chr19	9650016	9695627	149	45821	45611	real	Inv_Chr19_46
Gm19	14129166	14150625	INV + translocatoin	Chr19	17391093	17411998	148	21459	20905	real	Inv_Chr19_21
Gm20	21077741	21129745	INV + translocatoin	Chr20	31148235	31200642	163	52004	52407	real	Inv_Chr20_52
Gm16	35565884	35576034	INV + translocatoin	Chr16	33852167	33862335	123	10150	10168	real; contain scaffold_93 of the Williams 82 assembly	Inv_Chr16_10
Gm03	13396577	13463432	INV	Chr03	11930427	11987928	15	66855	57501	single marker
Gm04	31810108	31960805	INV + translocatoin	Chr04	27287609	27447777	25	150697	160168	single marker
Gm04	30992533	31214834	INV	Chr04	32940865	33163228	24	222301	222363	single marker
Gm06	23767036	23953962	INV + translocatoin	Chr06	24660689	24864383	34	186926	203694	single marker
Gm08	32234260	32487851	INV + translocatoin	Chr08	27438032	27715590	53	253591	277558	single marker
Gm08	30111267	31008641	INV + translocatoin	Chr08	27717668	28630381	51	897374	912713	single marker
Gm08	31385749	31580556	INV	Chr08	30387000	30581705	52	194807	194705	single marker
Gm12	23747601	24214919	INV + translocatoin	Chr12	22456861	22926016	76	467318	469155	single marker
Gm13	8838671	8909915	INV + translocatoin	Chr13	7654810	7752927	89	71244	98117	single marker
Gm13	4141868	4193086	INV + translocatoin	Chr13	8964546	9029175	84	51218	64629	single marker
Gm16	17679813	17914766	INV + translocatoin	Chr16	12490421	12766038	119	234953	275617	single marker
Gm16	12955156	13159097	INV	Chr16	12775056	13021864	113	203941	246808	single marker
Gm16	12808355	12931791	INV + translocatoin	Chr16	14156682	14238977	112	123436	82295	single marker
Gm16	12650310	12807639	INV + translocatoin	Chr16	15138704	15285029	111	157329	146325	single marker
Gm16	16252852	16324095	INV + translocatoin	Chr16	19399099	19465171	117	71243	66072	single marker
Gm17	24313523	24536900	INV + translocatoin	Chr17	27349639	27573261	126	223377	223622	single marker
Gm17	28482404	28589121	INV + translocatoin	Chr17	31003546	31110623	128	106717	107077	single marker
Gm19	20370196	20498009	INV + translocatoin	Chr19	12778669	12896439	153	127813	117770	single marker
Gm19	10608441	10690194	INV + translocatoin	Chr19	19108953	19189240	145	81753	80287	single marker
scaffold_21	397090	3565126	INV	Chr11	11298338	14454203	166	3168036	3155865	Unanchored scaffold of the Williams 82 assembly
scaffold_22	1985	790080	INV	Chr11	26394907	26957770	167	788095	562863	Unanchored scaffold of the Williams 82 assembly
Gm11	24369303	24821256	INV + translocatoin	Chr11	14480398	14953096	73	451953	472698	Unanchored scaffold of the Williams 82 assembly; a part of unanchored scaffold_21 of the Williams 82 assembly

## Sheet: Translocaiotn
REF_CHROM	REF_START	REF_END	Q_CHROM	Q_START	Q_END	REF_LEN	Q_LEN	% IDY	STRAND	Comments
Gm01	33688	39793	chrLG16_pilon_arrow	10497522	10491422	6106	6101	97.89	-
Gm01	1004820	1005990	chrLG11_pilon_arrow	20257552	20256382	1171	1171	96.59	-
Gm01	1210894	1215960	chrLG09_pilon_arrow	33969726	33964658	5067	5069	99.78	-
Gm01	1277026	1281583	chrLG18_pilon_arrow	50102291	50106890	4558	4600	96.62	+
Gm01	2462166	2465148	chrLG18_pilon_arrow	10377644	10374662	2983	2983	99.53	-
Gm01	2960269	2970228	chrLG19_pilon_arrow	34517013	34526972	9960	9960	99.83	+
Gm01	4800814	4804618	chrLG07_pilon_arrow	4143991	4140187	3805	3805	98	-
Gm01	4854318	4858928	chrLG12_pilon_arrow	30638477	30633864	4611	4614	95.75	-
Gm01	5167767	5171051	chrLG07_pilon_arrow	39951936	39948687	3285	3250	95.14	-
Gm01	5828201	5829852	chrLG08_pilon_arrow	15879510	15881161	1652	1652	99.88	+
Gm01	5831556	5834602	chrLG08_pilon_arrow	15882329	15885407	3047	3079	98.67	+
Gm01	8320076	8323576	chrLG07_pilon_arrow	21546419	21542902	3501	3518	95.31	-
Gm01	8993220	8995544	chrLG09_pilon_arrow	18699612	18697288	2325	2325	99.01	-
Gm01	8997406	8998649	chrLG18_pilon_arrow	7153314	7152074	1244	1241	95.2	-
Gm01	9173379	9188321	chrLG04_pilon_arrow	26838717	26853638	14943	14922	98.26	+
Gm01	9211764	9213235	chrLG03_pilon_arrow	7402892	7401421	1472	1472	97.42	-
Gm01	9316786	9320126	chrLG05_pilon_arrow	19879908	19876572	3341	3337	98.86	-
Gm01	9639212	9649004	chrLG19_pilon_arrow	14613126	14603323	9793	9804	95.89	-
Gm01	9843270	9844544	chrLG19_pilon_arrow	50420	49146	1275	1275	96.71	-
Gm01	10089957	10094628	chrLG08_pilon_arrow	43131013	43126342	4672	4672	99.83	-
Gm01	11404525	11405806	chrLG08_pilon_arrow	40704918	40703641	1282	1278	96.88	-
Gm01	11581007	11584826	chrLG12_pilon_arrow	16014821	16018641	3820	3821	98.17	+
Gm01	11643326	11644415	chrLG03_pilon_arrow	39297545	39296455	1090	1091	98.81	-
Gm01	11778559	11781706	chrLG14_pilon_arrow	43327144	43323969	3148	3176	96.33	-
Gm01	11900174	11904839	chrLG15_pilon_arrow	24446777	24442130	4666	4648	95.49	-
Gm01	12160111	12162277	chrLG18_pilon_arrow	35825209	35827442	2167	2234	96.37	+
Gm01	12985633	12986770	chrLG14_pilon_arrow	21640015	21638878	1138	1138	99.82	-
Gm01	14078730	14082931	chrLG11_pilon_arrow	37978264	37974060	4202	4205	98.08	-
Gm01	14195561	14198000	chrLG12_pilon_arrow	33508437	33505986	2440	2452	97.03	-
Gm01	14700540	14702564	chrLG20_pilon_arrow	10210168	10208127	2025	2042	98.44	-
Gm01	15168689	15173868	chrLG03_pilon_arrow	15535773	15530604	5180	5170	98.03	-
Gm01	16386027	16387603	chrLG16_pilon_arrow	2655620	2654048	1577	1573	96.26	-
Gm01	16430289	16438553	chrLG03_pilon_arrow	13732903	13741181	8265	8279	98.03	+
Gm01	17676513	17684056	chrLG11_pilon_arrow	20130261	20122719	7544	7543	99.19	-
Gm01	18157904	18159685	chrLG19_pilon_arrow	2988711	2986930	1782	1782	97.81	-
Gm01	19325150	19328225	chrLG09_pilon_arrow	16004193	16001069	3076	3125	96.9	-
Gm01	19419196	19429171	chrLG10_pilon_arrow	12789830	12799848	9976	10019	96.26	+
Gm01	20052050	20058237	chrLG19_pilon_arrow	21824138	21817974	6188	6165	97.15	-
Gm01	20161154	20166350	chrLG20_pilon_arrow	29308847	29314027	5197	5181	96.8	+
Gm01	20921057	20923330	chrLG07_pilon_arrow	12435991	12438260	2274	2270	99.38	+
Gm01	21183299	21189249	chrLG04_pilon_arrow	21906305	21900340	5951	5966	95.59	-
Gm01	21391756	21397938	chrLG09_pilon_arrow	29507379	29513557	6183	6179	97.22	+
Gm01	21428537	21434138	chrLG14_pilon_arrow	22690792	22696366	5602	5575	98.1	+
Gm01	21437614	21440037	chrLG14_pilon_arrow	22698678	22701092	2424	2415	99.22	+
Gm01	21825330	21834354	chrLG16_pilon_arrow	17265603	17256558	9025	9046	98.94	-
Gm01	21982923	21989388	chrLG20_pilon_arrow	17592230	17585750	6466	6481	99.09	-
Gm01	22356027	22359569	chrLG16_pilon_arrow	13121052	13117518	3543	3535	98.05	-
Gm01	22630084	22635208	chrLG09_pilon_arrow	30358848	30363967	5125	5120	97.22	+
Gm01	22804233	22813791	chrLG17_pilon_arrow	16880964	16871398	9559	9567	98.87	-
Gm01	23651235	23654486	chrLG12_pilon_arrow	27660389	27657134	3252	3256	96.9	-
Gm01	23867666	23873198	chrLG02_pilon_arrow	18526546	18532069	5533	5524	98.79	+
Gm01	25156476	25162673	chrLG19_pilon_arrow	13981893	13975701	6198	6193	97.28	-
Gm01	25555477	25557048	chrLG03_pilon_arrow	6228672	6227125	1572	1548	95.24	-
Gm01	25588049	25590575	chrLG20_pilon_arrow	24336482	24333956	2527	2527	98.5	-
Gm01	25651032	25655081	chrLG18_pilon_arrow	10116799	10112723	4050	4077	95.86	-
Gm01	25776389	25784780	chrLG15_pilon_arrow	21810846	21802505	8392	8342	97.89	-
Gm01	26983629	26984769	chrLG04_pilon_arrow	25825040	25823897	1141	1144	98.25	-
Gm01	27697675	27698804	chrLG13_pilon_arrow	23733391	23732264	1130	1128	96.55	-
Gm01	27979713	27981341	chrLG06_pilon_arrow	40604533	40602903	1629	1631	97.61	-
Gm01	28352597	28355667	chrLG04_pilon_arrow	26276449	26279517	3071	3069	95.23	+
Gm01	28565804	28567124	chrLG04_pilon_arrow	26503198	26504526	1321	1329	95.65	+
Gm01	28569705	28574612	chrLG04_pilon_arrow	26506063	26510923	4908	4861	95.77	+
Gm01	28585851	28587252	chrLG04_pilon_arrow	26557522	26558919	1402	1398	95.32	+
Gm01	28614947	28616806	chrLG04_pilon_arrow	26574773	26576632	1860	1860	95.93	+
Gm01	28912003	28914938	chrLG06_pilon_arrow	24481245	24484158	2936	2914	97.42	+
Gm01	28916384	28920092	chrLG08_pilon_arrow	30667372	30671069	3709	3698	97.45	+
Gm01	29096497	29098230	chrLG11_pilon_arrow	37619990	37618258	1734	1733	97.12	-
Gm01	29151775	29160233	chrLG20_pilon_arrow	30184373	30175904	8459	8470	98.46	-
Gm01	29497633	29504140	chrLG02_pilon_arrow	13491727	13485176	6508	6552	95.47	-
Gm01	29613117	29618820	chrLG14_pilon_arrow	15744291	15738562	5704	5730	98.99	-
Gm01	29679947	29684349	chrLG15_pilon_arrow	35910700	35906300	4403	4401	98.23	-
Gm01	30020345	30021641	chrLG12_pilon_arrow	5721929	5720629	1297	1301	95.78	-
Gm01	30021658	30023097	chrLG10_pilon_arrow	1020335	1018918	1440	1418	95.21	-
Gm01	30079267	30086278	chrLG05_pilon_arrow	19206546	19213557	7012	7012	99.67	+
Gm01	31219972	31224412	chrLG20_pilon_arrow	20127262	20131677	4441	4416	97.37	+
Gm01	31264868	31270803	chrLG12_pilon_arrow	27234060	27228132	5936	5929	97.36	-
Gm01	31558887	31563952	chrLG15_pilon_arrow	42369010	42363955	5066	5056	98.99	-
Gm01	32463169	32472836	chrLG06_pilon_arrow	20951619	20961289	9668	9671	99.7	+
Gm01	32752558	32762480	chrLG07_pilon_arrow	25378830	25368960	9923	9871	96.01	-
Gm01	32778146	32785670	chrLG18_pilon_arrow	25499335	25491776	7525	7560	98.16	-
Gm01	33401152	33409955	chrLG09_pilon_arrow	29296056	29287209	8804	8848	97.04	-
Gm01	33990991	33993114	chrLG15_pilon_arrow	43979276	43977151	2124	2126	95.49	-
Gm01	34303324	34307382	chrLG05_pilon_arrow	23573727	23569665	4059	4063	99.43	-
Gm01	34651115	34658074	chrLG07_pilon_arrow	25728847	25721857	6960	6991	97.17	-
Gm01	34705990	34709245	chrLG10_pilon_arrow	8168110	8171365	3256	3256	99.6	+
Gm01	34837947	34843570	chrLG09_pilon_arrow	16755140	16760769	5624	5630	98.3	+
Gm01	35033135	35036694	chrLG03_pilon_arrow	15670143	15666579	3560	3565	98.18	-
Gm01	35041431	35044994	chrLG03_pilon_arrow	15670143	15666578	3564	3566	98.1	-
Gm01	35112845	35114033	chrLG08_pilon_arrow	35439611	35438424	1189	1188	99.16	-
Gm01	36173982	36178640	chrLG13_pilon_arrow	19736843	19732083	4659	4761	96.52	-
Gm01	36712008	36720405	chrLG02_pilon_arrow	34251516	34243123	8398	8394	97.12	-
Gm01	38566572	38571357	chrLG07_pilon_arrow	18739008	18734205	4786	4804	96.38	-
Gm01	38623514	38639566	chrLG06_pilon_arrow	24923157	24939210	16053	16054	98.12	+
Gm01	38982999	38984779	chrLG15_pilon_arrow	24863641	24861859	1781	1783	98.26	-
Gm01	39048103	39049349	chrLG08_pilon_arrow	14201471	14200225	1247	1247	98.4	-
Gm01	39234407	39235584	chrLG06_pilon_arrow	38791608	38792786	1178	1179	99.75	+
Gm01	40024274	40028809	chrLG05_pilon_arrow	13760748	13765282	4536	4535	99.34	+
Gm01	40028910	40034100	chrLG05_pilon_arrow	13765345	13770540	5191	5196	98.98	+
Gm01	40036142	40038084	chrLG14_pilon_arrow	31421114	31423056	1943	1943	99.79	+
Gm01	40699915	40701210	chrLG06_pilon_arrow	30802085	30800792	1296	1294	96.84	-
Gm01	40770314	40773841	chrLG08_pilon_arrow	20803720	20800192	3528	3529	96.69	-
Gm01	40867447	40869809	chrLG17_pilon_arrow	21579372	21576988	2363	2385	98.16	-
Gm01	41415497	41422770	chrLG17_pilon_arrow	26806464	26813736	7274	7273	98.45	+
Gm01	41521798	41522911	chrLG11_pilon_arrow	129660	128547	1114	1114	98.56	-
Gm01	41531783	41535762	chrLG12_pilon_arrow	1901835	1897856	3980	3980	99.05	-
Gm01	41538594	41545181	chrLG08_pilon_arrow	21652995	21646413	6588	6583	98.57	-
Gm01	41625241	41627202	chrLG03_pilon_arrow	8424546	8422585	1962	1962	98.22	-
Gm01	41831916	41834471	chrLG10_pilon_arrow	34299099	34296559	2556	2541	95.39	-
Gm01	41923252	41924994	chrLG05_pilon_arrow	5914105	5912364	1743	1742	98.62	-
Gm01	42434594	42437760	chrLG18_pilon_arrow	23032894	23036071	3167	3178	96.09	+
Gm01	42572529	42577687	chrLG10_pilon_arrow	27269966	27264811	5159	5156	96.69	-
Gm01	42819507	42820982	chrLG06_pilon_arrow	7612273	7610804	1476	1470	96.27	-
Gm01	43267270	43269846	chrLG06_pilon_arrow	37045773	37048349	2577	2577	99.5	+
Gm01	43425885	43431096	chrLG17_pilon_arrow	34345473	34340268	5212	5206	97.55	-
Gm01	43975259	43976579	chrLG08_pilon_arrow	2988379	2987062	1321	1318	95.99	-
Gm01	43995942	43997430	chrLG18_pilon_arrow	50261147	50262635	1489	1489	99.87	+
Gm01	44580680	44582415	chrLG12_pilon_arrow	34799843	34798120	1736	1724	95.17	-
Gm01	44636646	44640725	chrLG05_pilon_arrow	27137990	27133924	4080	4067	95.38	-
Gm01	44796579	44801812	chrLG19_pilon_arrow	3872338	3867074	5234	5265	95.22	-
Gm01	45329946	45334235	chrLG16_pilon_arrow	9592812	9588549	4290	4264	97.95	-
Gm01	46844169	46846064	chrLG05_pilon_arrow	30729568	30727667	1896	1902	95.01	-
Gm01	46874460	46877183	chrLG06_pilon_arrow	27960361	27963083	2724	2723	97.14	+
Gm01	46938802	46940386	chrLG07_pilon_arrow	27433345	27434928	1585	1584	96.97	+
Gm01	47192862	47196765	chrLG04_pilon_arrow	11944138	11948032	3904	3895	97.84	+
Gm01	47539539	47540654	chrLG10_pilon_arrow	32999145	32998030	1116	1116	99.46	-
Gm01	47667684	47669944	chrLG02_pilon_arrow	45391113	45388852	2261	2262	99.56	-
Gm01	47722379	47725233	chrLG17_pilon_arrow	8551409	8548556	2855	2854	97.56	-
Gm01	48063205	48069086	chrLG20_pilon_arrow	36856834	36862691	5882	5858	99.51	+
Gm01	48900172	48905305	chrLG03_pilon_arrow	37313177	37318312	5134	5136	99.1	+
Gm01	49199306	49200686	chrLG11_pilon_arrow	6808485	6807102	1381	1384	95.11	-
Gm01	49221911	49225868	chrLG15_pilon_arrow	16784886	16780928	3958	3959	96.27	-
Gm01	49437718	49439040	chrLG07_pilon_arrow	8607319	8605998	1323	1322	99.32	-
Gm01	49592705	49595589	chrLG11_pilon_arrow	6529876	6526987	2885	2890	95.82	-
Gm01	50029834	50033608	chrLG11_pilon_arrow	6090205	6086436	3775	3770	95.39	-
Gm01	50641406	50642922	chrLG11_pilon_arrow	5558052	5556531	1517	1522	96.65	-
Gm01	50665714	50669704	chrLG19_pilon_arrow	1861031	1857030	3991	4002	99.3	-
Gm01	51513051	51514463	chrLG19_pilon_arrow	2491962	2490549	1413	1414	98.44	-
Gm01	52254359	52255578	chrLG13_pilon_arrow	7714713	7715937	1220	1225	95.84	+
Gm01	52670930	52672916	chrLG15_pilon_arrow	18727042	18725038	1987	2005	95.87	-
Gm01	53404298	53406075	chrLG20_pilon_arrow	4492638	4490868	1778	1771	96.29	-
Gm01	53463779	53466465	chrLG13_pilon_arrow	2900025	2902725	2687	2701	96.83	+
Gm01	54031766	54034310	chrLG11_pilon_arrow	2445152	2442625	2545	2528	95.02	-
Gm01	54112062	54117328	chrLG14_pilon_arrow	46836593	46841857	5267	5265	99.47	+
Gm01	54592144	54593896	chrLG14_pilon_arrow	7871942	7870206	1753	1737	98.4	-
Gm01	54891969	54894933	chrLG11_pilon_arrow	1727163	1724207	2965	2957	95.42	-
Gm01	55296543	55304013	chrLG16_pilon_arrow	7626973	7634439	7471	7467	98.65	+
Gm01	55324069	55325498	chrLG11_pilon_arrow	1292589	1291166	1430	1424	95.52	-
Gm01	55546762	55548359	chrLG11_pilon_arrow	1087547	1085941	1598	1607	95.4	-
Gm01	56023449	56025724	chrLG11_pilon_arrow	613444	611170	2276	2275	96.22	-
Gm01	56530492	56531947	chrLG11_pilon_arrow	138844	137387	1456	1458	95.54	-
Gm01	56705888	56711851	chrLG02_pilon_arrow	15229783	15223822	5964	5962	98.89	-
Gm01	56809928	56811419	chrLG07_pilon_arrow	40471768	40470281	1492	1488	96.99	-
Gm02	142632	143877	chrLG03_pilon_arrow	8409242	8410488	1246	1247	96.72	+
Gm02	220863	225718	chrLG16_pilon_arrow	28389735	28394589	4856	4855	99.05	+
Gm02	346809	349767	chrLG18_pilon_arrow	49937506	49934536	2959	2971	98.25	-
Gm02	350584	353015	chrLG18_pilon_arrow	49933854	49931439	2432	2416	97.62	-
Gm02	414954	417322	chrLG16_pilon_arrow	32872410	32874814	2369	2405	96.1	+
Gm02	1138245	1141184	chrLG14_pilon_arrow	10733743	10730812	2940	2932	98	-
Gm02	2131045	2132518	chrLG13_pilon_arrow	10870157	10868684	1474	1474	96.34	-
Gm02	3050094	3053762	chrLG20_pilon_arrow	35600782	35597114	3669	3669	99.89	-
Gm02	5389909	5394700	chrLG12_pilon_arrow	25216265	25221035	4792	4771	98	+
Gm02	6105492	6107300	chrLG13_pilon_arrow	29925172	29923360	1809	1813	98.57	-
Gm02	6646959	6650289	chrLG05_pilon_arrow	17608369	17611689	3331	3321	96.58	+
Gm02	6971436	6974504	chrLG18_pilon_arrow	10184434	10181359	3069	3076	98.05	-
Gm02	8006532	8009534	chrLG20_pilon_arrow	18263075	18266084	3003	3010	96.68	+
Gm02	8335159	8336593	chrLG12_pilon_arrow	13881197	13879763	1435	1435	98.26	-
Gm02	8501964	8505385	chrLG18_pilon_arrow	54329453	54326045	3422	3409	95.48	-
Gm02	8745254	8748744	chrLG18_pilon_arrow	54121439	54117955	3491	3485	95.4	-
Gm02	9292521	9293780	chrLG13_pilon_arrow	24656464	24655205	1260	1260	96.83	-
Gm02	10664775	10667033	chrLG20_pilon_arrow	10876987	10879245	2259	2259	99.69	+
Gm02	12880479	12888676	chrLG05_pilon_arrow	12467418	12459210	8198	8209	97.72	-
Gm02	12904402	12912765	chrLG03_pilon_arrow	17481053	17472694	8364	8360	95.77	-
Gm02	13291724	13297791	chrLG07_pilon_arrow	42134932	42128864	6068	6069	99.65	-
Gm02	13696731	13702836	chrLG01_pilon_arrow	26764565	26758510	6106	6056	95.51	-
Gm02	13889832	13893475	chrLG01_pilon_arrow	5128975	5132621	3644	3647	99.45	+
Gm02	14235986	14242313	chrLG17_pilon_arrow	136088	129766	6328	6323	96.24	-
Gm02	14349115	14350824	chrLG07_pilon_arrow	35322242	35320520	1710	1723	95.78	-
Gm02	14566528	14570141	chrLG05_pilon_arrow	55093	58702	3614	3610	99.83	+
Gm02	14847754	14851002	chrLG20_pilon_arrow	38708641	38705380	3249	3262	95.9	-
Gm02	14851996	14853898	chrLG10_pilon_arrow	2641066	2639155	1903	1912	95.4	-
Gm02	14855209	14865066	chrLG10_pilon_arrow	2637926	2628069	9858	9858	96.48	-
Gm02	15458726	15464068	chrLG10_pilon_arrow	2083189	2077882	5343	5308	95.22	-
Gm02	17073608	17080084	chrLG04_pilon_arrow	14164789	14158314	6477	6476	99.66	-
Gm02	17295691	17300609	chrLG15_pilon_arrow	9522496	9517581	4919	4916	99.23	-
Gm02	17800256	17801646	chrLG10_pilon_arrow	7749971	7748581	1391	1391	95.76	-
Gm02	17885336	17890317	chrLG16_pilon_arrow	29679301	29684281	4982	4981	99.52	+
Gm02	18361736	18364844	chrLG14_pilon_arrow	15137201	15134105	3109	3097	96.22	-
Gm02	18377341	18385821	chrLG11_pilon_arrow	30878221	30869734	8481	8488	98.3	-
Gm02	19190185	19191662	chrLG15_pilon_arrow	13758728	13757235	1478	1494	97.79	-
Gm02	19210480	19211521	chrLG18_pilon_arrow	19848975	19847933	1042	1043	99.71	-
Gm02	19243090	19251562	chrLG16_pilon_arrow	13073869	13065396	8473	8474	99.19	-
Gm02	19576620	19580328	chrLG13_pilon_arrow	7465652	7469380	3709	3729	96.83	+
Gm02	20414724	20417473	chrLG11_pilon_arrow	17727722	17730459	2750	2738	98.58	+
Gm02	20644462	20653034	chrLG04_pilon_arrow	20037934	20029335	8573	8600	97.46	-
Gm02	20999045	21000380	chrLG15_pilon_arrow	44063484	44062137	1336	1348	98.59	-
Gm02	21201763	21205264	chrLG14_pilon_arrow	17689460	17685963	3502	3498	98.23	-
Gm02	21654277	21656968	chrLG09_pilon_arrow	2172619	2169915	2692	2705	96.83	-
Gm02	21657069	21659241	chrLG09_pilon_arrow	2169918	2167740	2173	2179	96.12	-
Gm02	21944740	21964145	chrLG06_pilon_arrow	31115717	31096309	19406	19409	99.37	-
Gm02	22152328	22155406	chrLG05_pilon_arrow	17173385	17170294	3079	3092	96.59	-
Gm02	22268528	22276200	chrLG07_pilon_arrow	31117799	31125454	7673	7656	96.77	+
Gm02	22357159	22371481	chrLG18_pilon_arrow	39248680	39263022	14323	14343	97.93	+
Gm02	23653219	23655291	chrLG15_pilon_arrow	32484374	32482291	2073	2084	95.03	-
Gm02	24196874	24198295	chrLG17_pilon_arrow	102228	103649	1422	1422	100	+
Gm02	24198295	24200067	chrLG17_pilon_arrow	106509	108281	1773	1773	99.94	+
Gm02	24218395	24219613	chrLG08_pilon_arrow	39000137	38998920	1219	1218	98.94	-
Gm02	24223871	24225268	chrLG08_pilon_arrow	38995533	38994132	1398	1402	99.22	-
Gm02	24777380	24780804	chrLG11_pilon_arrow	19167821	19164386	3425	3436	97.15	-
Gm02	25427801	25431963	chrLG09_pilon_arrow	27590775	27586616	4163	4160	96.04	-
Gm02	25818988	25823147	chrLG12_pilon_arrow	28700554	28696393	4160	4162	96.69	-
Gm02	26131796	26133610	chrLG03_pilon_arrow	22968999	22970809	1815	1811	96.65	+
Gm02	26405342	26407506	chrLG06_pilon_arrow	38792069	38789905	2165	2165	99.4	-
Gm02	27096525	27100644	chrLG16_pilon_arrow	18032693	18028575	4120	4119	99.51	-
Gm02	27172708	27173708	chrLG17_pilon_arrow	28414685	28413685	1001	1001	100	-
Gm02	27326150	27328928	chrLG08_pilon_arrow	39313807	39311027	2779	2781	97.46	-
Gm02	27330994	27332888	chrLG06_pilon_arrow	13316360	13314467	1895	1894	98.47	-
Gm02	28785482	28786715	chrLG19_pilon_arrow	38405088	38403849	1234	1240	96.05	-
Gm02	28957831	28965103	chrLG05_pilon_arrow	23974469	23967190	7273	7280	98.67	-
Gm02	29900459	29903789	chrLG12_pilon_arrow	16902152	16898857	3331	3296	98.26	-
Gm02	29942321	30001321	chrLG17_pilon_arrow	16453244	16394274	59001	58971	99.93	-
Gm02	30003955	30007637	chrLG17_pilon_arrow	16393524	16389842	3683	3683	99.78	-
Gm02	30263611	30272885	chrLG03_pilon_arrow	22654397	22663689	9275	9293	99.11	+
Gm02	30496046	30499770	chrLG03_pilon_arrow	21127347	21123623	3725	3725	98.36	-
Gm02	31535976	31541374	chrLG08_pilon_arrow	22611547	22616916	5399	5370	97.34	+
Gm02	32047223	32056425	chrLG13_pilon_arrow	12856558	12847356	9203	9203	95.01	-
Gm02	33338307	33346462	chrLG16_pilon_arrow	13877275	13885479	8156	8205	98.64	+
Gm02	33478176	33480679	chrLG10_pilon_arrow	21044538	21042044	2504	2495	95.45	-
Gm02	33562448	33566064	chrLG13_pilon_arrow	11089613	11086020	3617	3594	98.07	-
Gm02	34113060	34115654	chrLG13_pilon_arrow	8054162	8051562	2595	2601	97.62	-
Gm02	34446754	34449020	chrLG16_pilon_arrow	11160253	11157987	2267	2267	99.16	-
Gm02	34724192	34727189	chrLG10_pilon_arrow	27057073	27054071	2998	3003	96.74	-
Gm02	34733748	34739622	chrLG10_pilon_arrow	27050450	27044574	5875	5877	95.95	-
Gm02	34740958	34742537	chrLG10_pilon_arrow	27039790	27038206	1580	1585	96.66	-
Gm02	35324205	35326326	chrLG16_pilon_arrow	24291487	24289367	2122	2121	97.08	-
Gm02	35678090	35680567	chrLG18_pilon_arrow	20087957	20085471	2478	2487	96.78	-
Gm02	36105278	36114629	chrLG07_pilon_arrow	34485348	34476028	9352	9321	99.03	-
Gm02	36114718	36115962	chrLG07_pilon_arrow	34476028	34474785	1245	1244	98.96	-
Gm02	37051792	37056175	chrLG15_pilon_arrow	17958930	17954525	4384	4406	97.41	-
Gm02	37377757	37387002	chrLG14_pilon_arrow	22422180	22431405	9246	9226	98.68	+
Gm02	37583798	37593565	chrLG15_pilon_arrow	34200450	34210339	9768	9890	98.47	+
Gm02	37907360	37910283	chrLG03_pilon_arrow	36394589	36391667	2924	2923	98.8	-
Gm02	38449738	38450880	chrLG06_pilon_arrow	14627952	14626802	1143	1151	97.22	-
Gm02	38629998	38636205	chrLG09_pilon_arrow	26634420	26628198	6208	6223	98.46	-
Gm02	40366024	40367383	chrLG04_pilon_arrow	25633160	25631798	1360	1363	95.6	-
Gm02	40599509	40603958	chrLG04_pilon_arrow	28655991	28651554	4450	4438	98.56	-
Gm02	41727053	41728782	chrLG14_pilon_arrow	45641372	45639638	1730	1735	95	-
Gm02	42638294	42643141	chrLG09_pilon_arrow	23599232	23594387	4848	4846	96.14	-
Gm02	43146452	43147539	chrLG15_pilon_arrow	19666414	19665331	1088	1084	99.26	-
Gm02	43750512	43755115	chrLG14_pilon_arrow	5465339	5460751	4604	4589	95.8	-
Gm02	44039628	44041670	chrLG14_pilon_arrow	45093562	45091518	2043	2045	99.71	-
Gm02	45017616	45019250	chrLG14_pilon_arrow	42316545	42314915	1635	1631	98.05	-
Gm02	45865329	45866583	chrLG18_pilon_arrow	12688626	12687375	1255	1252	95.87	-	artificial translocation predicted by genetic map
Gm02	47008666	47010786	chrLG14_pilon_arrow	1777659	1775548	2121	2112	95.01	-
Gm02	47352168	47354012	chrLG05_pilon_arrow	35458106	35456269	1845	1838	98.06	-
Gm02	47418928	47425035	chrLG14_pilon_arrow	1262514	1256419	6108	6096	97.12	-
Gm02	47452789	47455641	chrLG14_pilon_arrow	1238969	1236113	2853	2857	95.22	-
Gm02	47801657	47803058	chrLG06_pilon_arrow	14964641	14963254	1402	1388	97.58	-
Gm02	47995633	47998526	chrLG14_pilon_arrow	696913	694001	2894	2913	96.23	-
Gm02	48060311	48062129	chrLG14_pilon_arrow	572656	570840	1819	1817	95.07	-
Gm03	32671	36578	chrLG19_pilon_arrow	47847896	47844004	3908	3893	96.72	-
Gm03	53511	55283	chrLG15_pilon_arrow	46079492	46077735	1773	1758	95.32	-
Gm03	642598	647851	chrLG19_pilon_arrow	38967497	38962244	5254	5254	100	-
Gm03	811556	816256	chrLG10_pilon_arrow	18573857	18569199	4701	4659	95.09	-
Gm03	1268535	1271987	chrLG10_pilon_arrow	37308555	37305084	3453	3472	98.82	-
Gm03	2572149	2577136	chrLG17_pilon_arrow	9471981	9466986	4988	4996	99.44	-
Gm03	2609890	2611853	chrLG16_pilon_arrow	34942394	34940433	1964	1962	98.73	-
Gm03	2702865	2706325	chrLG16_pilon_arrow	5771247	5767786	3461	3462	98.99	-
Gm03	3222554	3223880	chrLG19_pilon_arrow	40194262	40192933	1327	1330	99.55	-
Gm03	3223996	3226653	chrLG19_pilon_arrow	40192819	40190163	2658	2657	99.89	-
Gm03	3818915	3819995	chrLG20_pilon_arrow	4437987	4436907	1081	1081	99.81	-
Gm03	4084689	4090604	chrLG19_pilon_arrow	16330073	16336030	5916	5958	97.33	+
Gm03	4098553	4102805	chrLG19_pilon_arrow	16337956	16342171	4253	4216	97.7	+
Gm03	4118016	4122753	chrLG05_pilon_arrow	33457061	33452324	4738	4738	99.47	-
Gm03	4360694	4362421	chrLG01_pilon_arrow	43107067	43105351	1728	1717	95.21	-
Gm03	4529575	4532484	chrLG19_pilon_arrow	30540908	30538017	2910	2892	96.55	-
Gm03	4745365	4750518	chrLG04_pilon_arrow	43638502	43633351	5154	5152	97.85	-
Gm03	5232323	5234881	chrLG15_pilon_arrow	20896570	20893998	2559	2573	96.66	-
Gm03	5491396	5492587	chrLG18_pilon_arrow	10641139	10639961	1192	1179	96.48	-
Gm03	6595837	6600834	chrLG13_pilon_arrow	38505563	38500547	4998	5017	95.69	-
Gm03	6850980	6852973	chrLG09_pilon_arrow	9569734	9567763	1994	1972	96.75	-
Gm03	6852985	6854661	chrLG09_pilon_arrow	9567406	9565728	1677	1679	97.44	-
Gm03	7517547	7522167	chrLG19_pilon_arrow	34533818	34538438	4621	4621	99.83	+
Gm03	8054702	8056353	chrLG02_pilon_arrow	42549057	42547425	1652	1633	96.03	-
Gm03	8630634	8631897	chrLG20_pilon_arrow	8663969	8665232	1264	1264	100	+
Gm03	8712202	8713665	chrLG10_pilon_arrow	39706096	39704637	1464	1460	96.79	-
Gm03	8890985	8900464	chrLG13_pilon_arrow	13724702	13734223	9480	9522	97.11	+
Gm03	9016479	9017983	chrLG18_pilon_arrow	42046270	42044764	1505	1507	97.08	-
Gm03	9019973	9021934	chrLG01_pilon_arrow	39202651	39200690	1962	1962	98.22	-
Gm03	9195300	9197148	chrLG02_pilon_arrow	33792716	33794564	1849	1849	95.9	+
Gm03	10740366	10742910	chrLG02_pilon_arrow	32078864	32076318	2545	2547	98.27	-
Gm03	11448158	11450440	chrLG19_pilon_arrow	13664358	13662083	2283	2276	95.38	-
Gm03	11450590	11453222	chrLG19_pilon_arrow	13621921	13619268	2633	2654	96.69	-
Gm03	11796487	11799853	chrLG10_pilon_arrow	35242834	35239456	3367	3379	99.23	-
Gm03	12392558	12397945	chrLG14_pilon_arrow	44531440	44526039	5388	5402	98.12	-
Gm03	12412013	12414118	chrLG09_pilon_arrow	24093471	24091365	2106	2107	99.53	-
Gm03	12500375	12515534	chrLG14_pilon_arrow	38724244	38709084	15160	15161	98.72	-	artificial translocation predicted by genetic map
Gm03	12864635	12870964	chrLG17_pilon_arrow	14471230	14464904	6330	6327	99.07	-
Gm03	12872117	12935951	chrLG14_pilon_arrow	38374942	38311113	63835	63830	99.96	-	artificial translocation predicted by genetic map
Gm03	14248374	14253272	chrLG07_pilon_arrow	18803699	18798912	4899	4788	97.14	-
Gm03	14260628	14264745	chrLG09_pilon_arrow	10024660	10020544	4118	4117	98.62	-
Gm03	14551785	14556266	chrLG19_pilon_arrow	7824163	7819687	4482	4477	95.92	-
Gm03	14929827	14937384	chrLG12_pilon_arrow	22889846	22882292	7558	7555	98.67	-
Gm03	17434121	17441843	chrLG01_pilon_arrow	15610151	15617911	7723	7761	98.02	+
Gm03	17447304	17452353	chrLG17_pilon_arrow	20885377	20880354	5050	5024	98.08	-
Gm03	17566458	17570616	chrLG06_pilon_arrow	26965323	26961153	4159	4171	95	-
Gm03	17604530	17605795	chrLG15_pilon_arrow	27843407	27844672	1266	1266	97.55	+
Gm03	18425162	18428934	chrLG16_pilon_arrow	12912386	12916181	3773	3796	97.42	+
Gm03	18711925	18713844	chrLG11_pilon_arrow	30467300	30465379	1920	1922	97.82	-
Gm03	19621690	19623974	chrLG15_pilon_arrow	40142560	40140287	2285	2274	96.26	-
Gm03	19898294	19907553	chrLG01_pilon_arrow	25000876	25010142	9260	9267	99.17	+
Gm03	20259789	20264980	chrLG14_pilon_arrow	41443782	41438574	5192	5209	98.18	-
Gm03	20702937	20705958	chrLG09_pilon_arrow	22311575	22308556	3022	3020	97.26	-
Gm03	20742757	20745604	chrLG17_pilon_arrow	20090102	20092951	2848	2850	99.16	+
Gm03	21516745	21519780	chrLG20_pilon_arrow	9605509	9602449	3036	3061	98.2	-
Gm03	22260708	22261708	chrLG17_pilon_arrow	28413684	28414684	1001	1001	100	+
Gm03	22286439	22288678	chrLG12_pilon_arrow	22508242	22510484	2240	2243	96.3	+
Gm03	22519287	22530532	chrLG17_pilon_arrow	20092951	20104210	11246	11260	98.59	+
Gm03	22550547	22556067	chrLG11_pilon_arrow	27036850	27031327	5521	5524	97.76	-
Gm03	23047975	23053241	chrLG10_pilon_arrow	30735379	30730111	5267	5269	98.12	-
Gm03	23480103	23488848	chrLG20_pilon_arrow	22192596	22183715	8746	8882	95.96	-
Gm03	23537267	23542037	chrLG17_pilon_arrow	20097091	20101843	4771	4753	97.99	+
Gm03	23580524	23585493	chrLG20_pilon_arrow	15241957	15246926	4970	4970	98.39	+
Gm03	25158485	25165662	chrLG12_pilon_arrow	18413167	18420352	7178	7186	97.6	+
Gm03	26003905	26005185	chrLG14_pilon_arrow	1929003	1927716	1281	1288	97.06	-
Gm03	26005231	26006686	chrLG14_pilon_arrow	1927534	1926067	1456	1468	96.28	-
Gm03	26010494	26012242	chrLG07_pilon_arrow	8422136	8420376	1749	1761	95.35	-
Gm03	26557237	26558643	chrLG08_pilon_arrow	41996836	41995430	1407	1407	99.72	-
Gm03	26889043	26890666	chrLG05_pilon_arrow	5718824	5717204	1624	1621	99.26	-
Gm03	27097158	27102028	chrLG19_pilon_arrow	34240623	34235759	4871	4865	95.21	-
Gm03	27531420	27539419	chrLG02_pilon_arrow	12648711	12640738	8000	7974	97.96	-
Gm03	28035958	28042943	chrLG18_pilon_arrow	21358149	21351151	6986	6999	95.92	-
Gm03	28427826	28431508	chrLG13_pilon_arrow	23606244	23602557	3683	3688	96.94	-
Gm03	28562018	28563863	chrLG17_pilon_arrow	131608	129766	1846	1843	97.74	-
Gm03	28852935	28856561	chrLG16_pilon_arrow	14420222	14423845	3627	3624	97.55	+
Gm03	29353598	29358115	chrLG17_pilon_arrow	25834353	25838876	4518	4524	97.84	+
Gm03	30273135	30281785	chrLG10_pilon_arrow	22734708	22726087	8651	8622	96.33	-
Gm03	30338240	30340268	chrLG11_pilon_arrow	29224503	29226526	2029	2024	95.87	+
Gm03	30369707	30373591	chrLG17_pilon_arrow	33191954	33188068	3885	3887	96.66	-
Gm03	31198743	31200880	chrLG17_pilon_arrow	35789609	35787471	2138	2139	98.6	-
Gm03	31201345	31205294	chrLG02_pilon_arrow	46893516	46889595	3950	3922	98.28	-
Gm03	31693296	31695438	chrLG04_pilon_arrow	15148768	15146629	2143	2140	96.28	-
Gm03	32467363	32469164	chrLG12_pilon_arrow	6736227	6738027	1802	1801	96.12	+
Gm03	35274087	35279608	chrLG13_pilon_arrow	11385486	11379963	5522	5524	98.99	-
Gm03	36019611	36020962	chrLG15_pilon_arrow	22268523	22267173	1352	1351	98.74	-
Gm03	39912470	39924329	chrLG08_pilon_arrow	1514145	1526004	11860	11860	98.53	+
Gm03	40077077	40078167	chrLG01_pilon_arrow	11596256	11595167	1091	1090	98.9	-
Gm03	40254411	40258086	chrLG15_pilon_arrow	2058500	2054834	3676	3667	97.48	-
Gm03	40259427	40260942	chrLG15_pilon_arrow	2054833	2053316	1516	1518	98.49	-
Gm03	40261998	40267324	chrLG15_pilon_arrow	2052855	2047566	5327	5290	96.63	-
Gm03	41009439	41011332	chrLG19_pilon_arrow	3235963	3234093	1894	1871	96.67	-
Gm03	41037394	41039347	chrLG19_pilon_arrow	3244757	3242785	1954	1973	97.22	-
Gm03	41311393	41312873	chrLG14_pilon_arrow	27215743	27214264	1481	1480	96.35	-
Gm03	41559816	41562996	chrLG06_pilon_arrow	19435303	19432126	3181	3178	95.7	-
Gm03	43050330	43053633	chrLG06_pilon_arrow	7216276	7212970	3304	3307	99.31	-
Gm03	43055254	43059521	chrLG07_pilon_arrow	6804043	6808308	4268	4266	99.27	+
Gm03	43808977	43810582	chrLG09_pilon_arrow	38318164	38316556	1606	1609	99.56	-
Gm03	44133806	44141476	chrLG16_pilon_arrow	3083860	3091528	7671	7669	99.87	+
Gm04	18684	20055	chrLG13_pilon_arrow	46541652	46540280	1372	1373	95.56	-
Gm04	791901	800200	chrLG19_pilon_arrow	14986785	14978465	8300	8321	97.66	-
Gm04	803223	805280	chrLG13_pilon_arrow	44296622	44294559	2058	2064	96.71	-
Gm04	1373865	1375538	chrLG10_pilon_arrow	28181409	28179736	1674	1674	96.12	-
Gm04	2341950	2344064	chrLG10_pilon_arrow	35780055	35777945	2115	2111	99.72	-
Gm04	2344064	2346848	chrLG10_pilon_arrow	35777236	35774462	2785	2775	99.21	-
Gm04	2573615	2574787	chrLG09_pilon_arrow	9338685	9337522	1173	1164	98.13	-
Gm04	2600441	2601486	chrLG10_pilon_arrow	31713101	31712056	1046	1046	99.9	-
Gm04	3221355	3224291	chrLG08_pilon_arrow	276714	273867	2937	2848	96.39	-
Gm04	5043227	5046834	chrLG16_pilon_arrow	12919289	12922898	3608	3610	97.6	+
Gm04	7443038	7444425	chrLG18_pilon_arrow	13420830	13419453	1388	1378	95.26	-
Gm04	7460463	7461850	chrLG10_pilon_arrow	15853773	15852388	1388	1386	97.48	-
Gm04	7464607	7467026	chrLG10_pilon_arrow	15836069	15833656	2420	2414	97.19	-
Gm04	7499084	7502020	chrLG08_pilon_arrow	36790136	36787190	2937	2947	99.02	-
Gm04	7804953	7806439	chrLG10_pilon_arrow	27041961	27040473	1487	1489	98.79	-
Gm04	8411102	8413068	chrLG20_pilon_arrow	14515441	14513470	1967	1972	97.52	-
Gm04	8641957	8646975	chrLG09_pilon_arrow	40270033	40264998	5019	5036	97.36	-
Gm04	8764855	8766335	chrLG09_pilon_arrow	36605326	36603846	1481	1481	97.84	-
Gm04	8779682	8781157	chrLG16_pilon_arrow	24959930	24958421	1476	1510	97.02	-
Gm04	9002179	9008384	chrLG09_pilon_arrow	9990227	9984011	6206	6217	97.11	-
Gm04	9734417	9737083	chrLG19_pilon_arrow	24546098	24543455	2667	2644	96.26	-
Gm04	10009099	10013720	chrLG09_pilon_arrow	5341705	5346317	4622	4613	98.98	+
Gm04	10633761	10636354	chrLG11_pilon_arrow	17730306	17727721	2594	2586	97.42	-
Gm04	11314704	11322092	chrLG03_pilon_arrow	16091566	16098949	7389	7384	99.19	+	artificial translocation predicted by genetic map
Gm04	11323417	11352120	chrLG03_pilon_arrow	16109438	16138144	28704	28707	99.51	+	artificial translocation predicted by genetic map
Gm04	11352195	11355684	chrLG03_pilon_arrow	16142141	16145622	3490	3482	99.54	+	artificial translocation predicted by genetic map
Gm04	11372656	11411574	chrLG03_pilon_arrow	16146660	16185603	38919	38944	98.48	+	artificial translocation predicted by genetic map
Gm04	11413364	11414965	chrLG03_pilon_arrow	16193832	16195417	1602	1586	97.26	+	artificial translocation predicted by genetic map
Gm04	11415114	11427455	chrLG03_pilon_arrow	16206336	16218729	12342	12394	98.99	+	artificial translocation predicted by genetic map
Gm04	11427455	11474279	chrLG03_pilon_arrow	16218381	16265192	46825	46812	98.57	+	artificial translocation predicted by genetic map
Gm04	11474499	11490899	chrLG03_pilon_arrow	16265203	16281658	16401	16456	98.99	+	artificial translocation predicted by genetic map
Gm04	11545444	11553204	chrLG03_pilon_arrow	16337158	16344820	7761	7663	98.26	+	artificial translocation predicted by genetic map
Gm04	11560739	11563062	chrLG03_pilon_arrow	16351817	16354141	2324	2325	99.87	+	artificial translocation predicted by genetic map
Gm04	11565340	11590361	chrLG03_pilon_arrow	16354138	16379169	25022	25032	99.66	+	artificial translocation predicted by genetic map
Gm04	11644908	11702287	chrLG03_pilon_arrow	16434279	16491646	57380	57368	99.32	+	artificial translocation predicted by genetic map
Gm04	11724861	11730350	chrLG03_pilon_arrow	16491218	16496713	5490	5496	97.55	+	artificial translocation predicted by genetic map
Gm04	11732900	11734738	chrLG13_pilon_arrow	32339329	32337482	1839	1848	97.51	-	artificial translocation predicted by genetic map
Gm04	11839926	11847450	chrLG03_pilon_arrow	16565047	16572594	7525	7548	99.07	+	artificial translocation predicted by genetic map
Gm04	11848221	11852752	chrLG03_pilon_arrow	16573365	16577871	4532	4507	98.26	+	artificial translocation predicted by genetic map
Gm04	11915290	11918206	chrLG03_pilon_arrow	16648112	16651008	2917	2897	97.04	+	artificial translocation predicted by genetic map
Gm04	11928170	11943544	chrLG03_pilon_arrow	16656469	16671889	15375	15421	98.11	+	artificial translocation predicted by genetic map
Gm04	11943545	11947344	chrLG03_pilon_arrow	16705589	16709387	3800	3799	98.55	+	artificial translocation predicted by genetic map
Gm04	11947445	11954004	chrLG03_pilon_arrow	16709446	16716006	6560	6561	98.16	+	artificial translocation predicted by genetic map
Gm04	11954004	11958758	chrLG03_pilon_arrow	16717000	16721776	4755	4777	98.1	+	artificial translocation predicted by genetic map
Gm04	11959107	11973517	chrLG03_pilon_arrow	16722009	16736429	14411	14421	97.53	+	artificial translocation predicted by genetic map
Gm04	11973590	11981106	chrLG03_pilon_arrow	16736430	16743936	7517	7507	97.41	+	artificial translocation predicted by genetic map
Gm04	11991716	12000111	chrLG03_pilon_arrow	16770160	16778594	8396	8435	98.03	+	artificial translocation predicted by genetic map
Gm04	12035872	12039784	chrLG03_pilon_arrow	16807971	16811887	3913	3917	98.39	+	artificial translocation predicted by genetic map
Gm04	12056120	12061942	chrLG03_pilon_arrow	16849005	16854821	5823	5817	97.67	+	artificial translocation predicted by genetic map
Gm04	12062457	12071787	chrLG03_pilon_arrow	16855341	16864626	9331	9286	98.71	+	artificial translocation predicted by genetic map
Gm04	12090010	12107520	chrLG03_pilon_arrow	16899158	16916682	17511	17525	97.82	+	artificial translocation predicted by genetic map
Gm04	12117364	12127812	chrLG03_pilon_arrow	16916678	16927126	10449	10449	98.83	+	artificial translocation predicted by genetic map
Gm04	12518572	12527493	chrLG14_pilon_arrow	12201181	12192259	8922	8923	99.48	-
Gm04	12674910	12679315	chrLG02_pilon_arrow	32098504	32094085	4406	4420	98.76	-
Gm04	13233735	13235047	chrLG06_pilon_arrow	32095107	32096423	1313	1317	99.54	+
Gm04	13432556	13433774	chrLG14_pilon_arrow	1713425	1712206	1219	1220	98.53	-
Gm04	13814993	13820854	chrLG20_pilon_arrow	32739704	32733790	5862	5915	97.13	-
Gm04	13920090	13927248	chrLG03_pilon_arrow	29603588	29596416	7159	7173	98.36	-
Gm04	14187650	14190772	chrLG19_pilon_arrow	2664627	2661502	3123	3126	95.33	-
Gm04	14218422	14226832	chrLG03_pilon_arrow	15613410	15604994	8411	8417	98.21	-
Gm04	14859754	14869026	chrLG19_pilon_arrow	26693759	26684506	9273	9254	98.7	-
Gm04	15013840	15017215	chrLG15_pilon_arrow	23055627	23058979	3376	3353	97.78	+
Gm04	16312779	16314777	chrLG12_pilon_arrow	29520177	29518177	1999	2001	95.66	-
Gm04	16322002	16324170	chrLG12_pilon_arrow	29517387	29515218	2169	2170	95.13	-
Gm04	16325752	16327733	chrLG12_pilon_arrow	29469738	29467744	1982	1995	95.29	-
Gm04	16359444	16361211	chrLG09_pilon_arrow	32990002	32991769	1768	1768	99.66	+
Gm04	16547057	16552278	chrLG18_pilon_arrow	12125804	12120609	5222	5196	96.13	-
Gm04	17020109	17023830	chrLG06_pilon_arrow	10656189	10652462	3722	3728	96.17	-
Gm04	17054084	17057556	chrLG06_pilon_arrow	41442785	41439305	3473	3481	96.28	-
Gm04	17171454	17176006	chrLG19_pilon_arrow	21828416	21823857	4553	4560	95.29	-
Gm04	17230991	17232333	chrLG15_pilon_arrow	9275950	9274611	1343	1340	95.76	-
Gm04	17307209	17310720	chrLG11_pilon_arrow	22686346	22682813	3512	3534	97.51	-
Gm04	17449803	17453635	chrLG20_pilon_arrow	16334432	16330594	3833	3839	97.01	-
Gm04	17699769	17700824	chrLG05_pilon_arrow	40375610	40374557	1056	1054	99.15	-
Gm04	17700848	17702050	chrLG11_pilon_arrow	185265	184063	1203	1203	97.18	-
Gm04	18436038	18448709	chrLG07_pilon_arrow	27102715	27115386	12672	12672	99.88	+
Gm04	18459064	18461232	chrLG08_pilon_arrow	12306815	12304654	2169	2162	98.2	-
Gm04	18488911	18547061	chrLG07_pilon_arrow	27156068	27214248	58151	58181	99.82	+
Gm04	18890463	18894417	chrLG18_pilon_arrow	45831598	45835555	3955	3958	97.15	+
Gm04	19653274	19654998	chrLG08_pilon_arrow	33631320	33629596	1725	1725	97.86	-
Gm04	20274475	20276397	chrLG07_pilon_arrow	16012830	16014753	1923	1924	99.38	+
Gm04	20942343	20944505	chrLG17_pilon_arrow	1419536	1417386	2163	2151	97.87	-
Gm04	21046947	21050694	chrLG10_pilon_arrow	23499166	23495446	3748	3721	96.38	-
Gm04	21347292	21348759	chrLG18_pilon_arrow	39707247	39708712	1468	1466	98.03	+
Gm04	21393363	21401962	chrLG02_pilon_arrow	18093985	18085413	8600	8573	97.48	-
Gm04	22400356	22403478	chrLG19_pilon_arrow	19557439	19554301	3123	3139	97.77	-
Gm04	22563660	22565212	chrLG08_pilon_arrow	12000655	11999081	1553	1575	97.21	-
Gm04	22712302	22716847	chrLG16_pilon_arrow	14629200	14633748	4546	4549	98.97	+
Gm04	22840357	22841527	chrLG13_pilon_arrow	26924732	26923563	1171	1170	99.83	-
Gm04	22841726	22845388	chrLG13_pilon_arrow	26923365	26919702	3663	3664	99.95	-
Gm04	22845489	22848235	chrLG13_pilon_arrow	26919655	26916909	2747	2747	100	-
Gm04	22925492	22929530	chrLG05_pilon_arrow	18166768	18170769	4039	4002	95.03	+
Gm04	23277789	23279921	chrLG17_pilon_arrow	17428949	17431092	2133	2144	95.71	+
Gm04	23309895	23318510	chrLG15_pilon_arrow	35647740	35656291	8616	8552	95.61	+
Gm04	23579938	23584588	chrLG07_pilon_arrow	27508381	27513026	4651	4646	99.01	+
Gm04	23813182	23819029	chrLG01_pilon_arrow	42817412	42811549	5848	5864	95.13	-
Gm04	24844616	24851049	chrLG12_pilon_arrow	26506855	26513292	6434	6438	97.03	+
Gm04	25246680	25258350	chrLG09_pilon_arrow	22578432	22590097	11671	11666	98.9	+
Gm04	26061066	26068997	chrLG18_pilon_arrow	25490949	25498876	7932	7928	98.3	+
Gm04	26167881	26169759	chrLG03_pilon_arrow	4727251	4725374	1879	1878	97.4	-
Gm04	26227652	26229180	chrLG18_pilon_arrow	38900986	38902520	1529	1535	97.13	+
Gm04	26229281	26233004	chrLG18_pilon_arrow	38902793	38906507	3724	3715	95.97	+
Gm04	26365251	26370886	chrLG15_pilon_arrow	25092003	25086303	5636	5701	96.03	-
Gm04	26373558	26376876	chrLG15_pilon_arrow	25086265	25082943	3319	3323	96.71	-
Gm04	27375450	27376812	chrLG02_pilon_arrow	40283592	40282233	1363	1360	95.6	-
Gm04	27567434	27568577	chrLG01_pilon_arrow	24685553	24684413	1144	1141	98.25	-
Gm04	27892404	27894167	chrLG18_pilon_arrow	34982680	34984447	1764	1768	98.98	+
Gm04	28643573	28651901	chrLG08_pilon_arrow	25688769	25680440	8329	8330	99.52	-
Gm04	28757962	28762072	chrLG10_pilon_arrow	31502615	31498525	4111	4091	96.48	-
Gm04	29480473	29487194	chrLG12_pilon_arrow	21723347	21716623	6722	6725	98.32	-
Gm04	29542556	29558630	chrLG20_pilon_arrow	12485746	12501802	16075	16057	98.16	+
Gm04	29609528	29617449	chrLG10_pilon_arrow	25742176	25750095	7922	7920	97.55	+
Gm04	29788674	29794195	chrLG12_pilon_arrow	27037085	27031561	5522	5525	99.15	-
Gm04	29859825	29868312	chrLG18_pilon_arrow	23234668	23243158	8488	8491	99.35	+
Gm04	29959683	29965376	chrLG13_pilon_arrow	9829035	9834742	5694	5708	96.41	+
Gm04	30693776	30694868	chrLG06_pilon_arrow	78742	77650	1093	1093	99.82	-
Gm04	30840385	30841722	chrLG07_pilon_arrow	7445745	7444408	1338	1338	96.94	-
Gm04	31000863	31003577	chrLG17_pilon_arrow	20197688	20200403	2715	2716	99.23	+
Gm04	31454353	31455643	chrLG06_pilon_arrow	24017989	24019279	1291	1291	99.92	+
Gm04	31656135	31660050	chrLG13_pilon_arrow	3382813	3386732	3916	3920	98.6	+
Gm04	31660186	31764344	chrLG13_pilon_arrow	3388265	3492425	104159	104161	99.99	+
Gm04	31882643	31884210	chrLG05_pilon_arrow	34378655	34377088	1568	1568	97.71	-
Gm04	32269835	32275234	chrLG07_pilon_arrow	20621632	20627005	5400	5374	98.26	+
Gm04	32406246	32413970	chrLG05_pilon_arrow	23078053	23085775	7725	7723	99.37	+
Gm04	32510484	32513993	chrLG03_pilon_arrow	14804907	14801401	3510	3507	95.99	-
Gm04	32602582	32604158	chrLG13_pilon_arrow	18243443	18241882	1577	1562	97.72	-
Gm04	33493375	33494689	chrLG09_pilon_arrow	26397987	26396673	1315	1315	98.41	-
Gm04	34487049	34497645	chrLG20_pilon_arrow	10643272	10653946	10597	10675	96.97	+
Gm04	34548269	34563188	chrLG01_pilon_arrow	9153942	9138997	14920	14946	98.22	-
Gm04	34701456	34707404	chrLG18_pilon_arrow	22289523	22295475	5949	5953	97.42	+
Gm04	34742731	34745474	chrLG02_pilon_arrow	35747734	35750477	2744	2744	99.23	+
Gm04	34883861	34888721	chrLG01_pilon_arrow	26224973	26220066	4861	4908	95.77	-
Gm04	34890680	34892009	chrLG01_pilon_arrow	26217485	26216165	1330	1321	95.65	-
Gm04	35102276	35105344	chrLG01_pilon_arrow	26033552	26030482	3069	3071	95.26	-
Gm04	35809742	35814167	chrLG16_pilon_arrow	21790322	21794759	4426	4438	97.57	+
Gm04	36383016	36385232	chrLG20_pilon_arrow	39992916	39990703	2217	2214	95.49	-
Gm04	37052188	37056300	chrLG10_pilon_arrow	18175292	18171176	4113	4117	98.11	-
Gm04	37169140	37173775	chrLG10_pilon_arrow	28491976	28487342	4636	4635	97.44	-
Gm04	37691959	37695869	chrLG12_pilon_arrow	27089973	27086064	3911	3910	99.87	-
Gm04	37896120	37899869	chrLG11_pilon_arrow	29766760	29770500	3750	3741	97.47	+
Gm04	38612469	38616845	chrLG15_pilon_arrow	31942970	31947347	4377	4378	98.95	+
Gm04	38921709	38924450	chrLG06_pilon_arrow	27409535	27412281	2742	2747	99.13	+
Gm04	39622258	39625026	chrLG14_pilon_arrow	10410889	10408116	2769	2774	97.12	-
Gm04	41177659	41199288	chrLG17_pilon_arrow	21564817	21586452	21630	21636	99.66	+
Gm04	41643734	41656759	chrLG16_pilon_arrow	33748690	33735657	13026	13034	98.69	-
Gm04	41670375	41676955	chrLG01_pilon_arrow	37365152	37371798	6581	6647	95.82	+
Gm04	42179154	42181860	chrLG06_pilon_arrow	42029729	42027022	2707	2708	95.83	-
Gm04	42774191	42775984	chrLG08_pilon_arrow	5939593	5937795	1794	1799	96.34	-
Gm04	42911339	42912539	chrLG20_pilon_arrow	34940236	34941436	1201	1201	99.33	+
Gm04	42930585	42935778	chrLG11_pilon_arrow	10946510	10951705	5194	5196	95.88	+
Gm04	43274377	43279480	chrLG01_pilon_arrow	45402407	45407553	5104	5147	98.23	+
Gm04	44398883	44400280	chrLG06_pilon_arrow	44594592	44593192	1398	1401	95.87	-
Gm04	44948302	44950005	chrLG06_pilon_arrow	15440211	15438510	1704	1702	96.07	-
Gm04	44954095	44955162	chrLG12_pilon_arrow	5559164	5558097	1068	1068	99.63	-
Gm04	46324951	46333063	chrLG13_pilon_arrow	31332577	31324462	8113	8116	97.15	-
Gm04	46678921	46680278	chrLG16_pilon_arrow	6845438	6844081	1358	1358	98.9	-
Gm04	46736216	46737630	chrLG08_pilon_arrow	242170	240755	1415	1416	96.26	-
Gm04	47718324	47719747	chrLG06_pilon_arrow	13325217	13323764	1424	1454	95.19	-
Gm04	48017833	48021130	chrLG15_pilon_arrow	37663366	37660085	3298	3282	96.55	-
Gm04	48068316	48070113	chrLG01_pilon_arrow	22991696	22989899	1798	1798	99.67	-
Gm04	48540944	48542416	chrLG14_pilon_arrow	17989140	17987663	1473	1478	95.88	-
Gm04	48903949	48909112	chrLG03_pilon_arrow	4790604	4785439	5164	5166	97.87	-
Gm04	49260956	49268469	chrLG12_pilon_arrow	36010783	36003258	7514	7526	98.21	-
Gm04	52353531	52358765	chrLG12_pilon_arrow	38300780	38295576	5235	5205	98.36	-
Gm04	52384961	52388552	chrLG11_pilon_arrow	3586	1	3592	3586	97.59	-
Gm05	52048	58098	chrLG02_pilon_arrow	14346888	14352933	6051	6046	99.6	+
Gm05	1984384	1985670	chrLG14_pilon_arrow	13921028	13919745	1287	1284	97.2	-
Gm05	2639509	2641767	chrLG01_pilon_arrow	8953156	8950907	2259	2250	96.15	-
Gm05	2824320	2826101	chrLG17_pilon_arrow	7386765	7384984	1782	1782	95.68	-
Gm05	2962201	2981208	chrLG12_pilon_arrow	34512191	34493229	19008	18963	99.52	-	artificial translocation predicted by genetic map
Gm05	4938209	4942639	chrLG19_pilon_arrow	3927902	3923468	4431	4435	97.86	-
Gm05	5254845	5259640	chrLG06_pilon_arrow	37569810	37565014	4796	4797	97.32	-
Gm05	5774164	5776297	chrLG09_pilon_arrow	31071912	31069766	2134	2147	95.32	-
Gm05	6163389	6165071	chrLG18_pilon_arrow	26808288	26809960	1683	1673	98.16	+
Gm05	6388196	6389646	chrLG12_pilon_arrow	15501071	15499620	1451	1452	95.66	-
Gm05	6833611	6837495	chrLG12_pilon_arrow	10916280	10912380	3885	3901	98.21	-
Gm05	7104167	7105638	chrLG09_pilon_arrow	1687331	1685862	1472	1470	96.06	-
Gm05	7132540	7139254	chrLG15_pilon_arrow	41073212	41066557	6715	6656	95.53	-
Gm05	7656079	7658330	chrLG08_pilon_arrow	42502391	42500129	2252	2263	97.84	-
Gm05	7663157	7667408	chrLG08_pilon_arrow	42500143	42495891	4252	4253	96.99	-
Gm05	7674414	7676618	chrLG08_pilon_arrow	42493984	42491773	2205	2212	95.4	-
Gm05	7679574	7683425	chrLG11_pilon_arrow	38101249	38097367	3852	3883	97.5	-
Gm05	9539338	9555423	chrLG16_pilon_arrow	12216754	12232845	16086	16092	98.42	+
Gm05	9687970	9693500	chrLG07_pilon_arrow	24234641	24229125	5531	5517	99.26	-
Gm05	10601067	10605856	chrLG18_pilon_arrow	15687068	15682300	4790	4769	95.98	-
Gm05	10676409	10681942	chrLG20_pilon_arrow	21520381	21525919	5534	5539	99.62	+
Gm05	11535558	11544844	chrLG06_pilon_arrow	31395318	31386029	9287	9290	99.4	-
Gm05	12611588	12612805	chrLG02_pilon_arrow	12679853	12678647	1218	1207	96.31	-
Gm05	12627065	12629185	chrLG02_pilon_arrow	12661060	12658936	2121	2125	96.8	-
Gm05	12632738	12642453	chrLG02_pilon_arrow	12623998	12614306	9716	9693	97.46	-
Gm05	12662600	12664740	chrLG06_pilon_arrow	29307045	29309185	2141	2141	99.77	+
Gm05	12871432	12877035	chrLG01_pilon_arrow	25430217	25435863	5604	5647	97.45	+
Gm05	12877107	12880493	chrLG14_pilon_arrow	32171645	32175033	3387	3389	98.82	+
Gm05	12927851	12939740	chrLG06_pilon_arrow	34555869	34567784	11890	11916	98.14	+
Gm05	13328147	13331467	chrLG02_pilon_arrow	6617621	6614291	3321	3331	96.58	-
Gm05	13448651	13451064	chrLG12_pilon_arrow	25359588	25361995	2414	2408	96.9	+
Gm05	13738906	13743149	chrLG01_pilon_arrow	18251122	18255371	4244	4250	97.2	+
Gm05	14057412	14059109	chrLG13_pilon_arrow	6006487	6008183	1698	1697	98.47	+
Gm05	14068498	14070897	chrLG03_pilon_arrow	11551663	11549251	2400	2413	97.2	-
Gm05	14106402	14110808	chrLG09_pilon_arrow	21880379	21884754	4407	4376	95.62	+
Gm05	14142553	14147572	chrLG13_pilon_arrow	9839685	9834638	5020	5048	97.45	-
Gm05	14718476	14727550	chrLG14_pilon_arrow	10674380	10683449	9075	9070	97.58	+
Gm05	14890899	14894784	chrLG16_pilon_arrow	12542981	12546886	3886	3906	99.28	+
Gm05	14930193	14933667	chrLG06_pilon_arrow	26240496	26243975	3475	3480	99.31	+
Gm05	16556278	16566859	chrLG15_pilon_arrow	26934219	26923613	10582	10607	97.86	-
Gm05	17502891	17505715	chrLG13_pilon_arrow	24118602	24121374	2825	2773	95.58	+
Gm05	17649841	17652818	chrLG06_pilon_arrow	35899097	35896121	2978	2977	97.72	-
Gm05	17867300	17874851	chrLG12_pilon_arrow	23833425	23841032	7552	7608	95.79	+
Gm05	17998558	18002116	chrLG17_pilon_arrow	35788382	35784849	3559	3534	97.3	-
Gm05	18062050	18066296	chrLG20_pilon_arrow	22127635	22123412	4247	4224	97.86	-
Gm05	18337532	18341743	chrLG01_pilon_arrow	16125291	16121079	4212	4213	98.03	-
Gm05	19397827	19407095	chrLG14_pilon_arrow	17019676	17028855	9269	9180	97.38	+
Gm05	19870773	19876527	chrLG11_pilon_arrow	38027175	38021428	5755	5748	99.41	-
Gm05	20771984	20774283	chrLG02_pilon_arrow	35844753	35842453	2300	2301	98.48	-
Gm05	20797539	20814584	chrLG03_pilon_arrow	11601524	11584465	17046	17060	98.91	-
Gm05	21407076	21409280	chrLG14_pilon_arrow	25979180	25976974	2205	2207	97.21	-
Gm05	21471006	21475133	chrLG17_pilon_arrow	19576420	19580546	4128	4127	99.66	+
Gm05	21661312	21674242	chrLG06_pilon_arrow	31896730	31883787	12931	12944	99	-
Gm05	21786812	21788357	chrLG04_pilon_arrow	13614583	13616129	1546	1547	99.03	+
Gm05	22177938	22180904	chrLG08_pilon_arrow	35060845	35057890	2967	2956	96.68	-
Gm05	22590005	22599585	chrLG03_pilon_arrow	11535359	11544923	9581	9565	99.26	+
Gm05	22764294	22766172	chrLG04_pilon_arrow	30955905	30957783	1879	1879	98.88	+
Gm05	22807438	22811360	chrLG15_pilon_arrow	30670217	30674153	3923	3937	98.61	+
Gm05	23048475	23054699	chrLG11_pilon_arrow	19328836	19322614	6225	6223	98.48	-
Gm05	23136829	23143044	chrLG03_pilon_arrow	11548351	11542108	6216	6244	98.24	-
Gm05	23520257	23522060	chrLG11_pilon_arrow	32661946	32660129	1804	1818	96.23	-
Gm05	23703778	23708556	chrLG01_pilon_arrow	21093165	21097941	4779	4777	98.6	+
Gm05	23912212	23913970	chrLG15_pilon_arrow	31952296	31954051	1759	1756	96.8	+
Gm05	25671908	25679802	chrLG02_pilon_arrow	25002135	25010022	7895	7888	98.82	+
Gm05	26066686	26079097	chrLG12_pilon_arrow	10245889	10258309	12412	12421	98.38	+
Gm05	26988531	26989687	chrLG08_pilon_arrow	13313721	13312565	1157	1157	96.89	-
Gm05	26990764	26991996	chrLG08_pilon_arrow	13312394	13311165	1233	1230	96.76	-
Gm05	27180825	27182952	chrLG08_pilon_arrow	41145602	41143489	2128	2114	96.78	-
Gm05	27330361	27332086	chrLG09_pilon_arrow	16913800	16915518	1726	1719	98.15	+
Gm05	27805777	27808550	chrLG07_pilon_arrow	15074705	15071930	2774	2776	98.7	-
Gm05	27930096	27931431	chrLG17_pilon_arrow	13976957	13975622	1336	1336	95.66	-
Gm05	28301251	28306049	chrLG03_pilon_arrow	24019427	24024217	4799	4791	95.25	+
Gm05	28319694	28321452	chrLG13_pilon_arrow	23519916	23521684	1759	1769	97.8	+
Gm05	28470595	28472642	chrLG10_pilon_arrow	5216291	5214249	2048	2043	98.63	-
Gm05	28756023	28758308	chrLG15_pilon_arrow	30933579	30935855	2286	2277	95.6	+
Gm05	28919057	28924173	chrLG20_pilon_arrow	4029526	4024386	5117	5141	95.36	-
Gm05	29018909	29025340	chrLG12_pilon_arrow	11689359	11695789	6432	6431	99.5	+
Gm05	29027674	29030031	chrLG12_pilon_arrow	11698672	11701028	2358	2357	97.56	+
Gm05	30281085	30283586	chrLG15_pilon_arrow	2142597	2140093	2502	2505	99.48	-
Gm05	30918821	30923181	chrLG18_pilon_arrow	38428065	38423724	4361	4342	96.81	-
Gm05	30923435	30924990	chrLG13_pilon_arrow	10570377	10568828	1556	1550	96.41	-
Gm05	31174676	31177236	chrLG11_pilon_arrow	14596216	14593654	2561	2563	98.48	-
Gm05	31182118	31187377	chrLG11_pilon_arrow	14588731	14583455	5260	5277	98.86	-
Gm05	31281401	31292298	chrLG06_pilon_arrow	16386911	16375957	10898	10955	98.23	-
Gm05	31464280	31466418	chrLG07_pilon_arrow	39636033	39633894	2139	2140	97.95	-
Gm05	31648306	31653096	chrLG09_pilon_arrow	18571870	18567089	4791	4782	95.87	-
Gm05	32397234	32399135	chrLG01_pilon_arrow	44981045	44979150	1902	1896	95.11	-
Gm05	32549194	32553532	chrLG20_pilon_arrow	30773441	30769082	4339	4360	98.42	-
Gm05	33521115	33523023	chrLG10_pilon_arrow	22261372	22259460	1909	1913	98.33	-
Gm05	33722010	33727018	chrLG06_pilon_arrow	12689847	12684834	5009	5014	97.69	-
Gm05	33878366	33881739	chrLG16_pilon_arrow	27871042	27867669	3374	3374	99.67	-
Gm05	33882404	33884167	chrLG16_pilon_arrow	27867586	27865816	1764	1771	99.44	-
Gm05	35631784	35632870	chrLG07_pilon_arrow	40218837	40219926	1087	1090	99.08	+
Gm05	36068111	36073044	chrLG03_pilon_arrow	2657225	2662152	4934	4928	97.91	+
Gm05	36160399	36163218	chrLG08_pilon_arrow	10024636	10027462	2820	2827	98.13	+	artificial translocation predicted by genetic map
Gm05	36163767	36180717	chrLG08_pilon_arrow	10027451	10044362	16951	16912	98.48	+	artificial translocation predicted by genetic map
Gm05	36182488	36200963	chrLG08_pilon_arrow	10045961	10064423	18476	18463	99.48	+	artificial translocation predicted by genetic map
Gm05	38704251	38709604	chrLG02_pilon_arrow	7030142	7024765	5354	5378	98.94	-
Gm05	39783397	39785836	chrLG18_pilon_arrow	10174848	10172407	2440	2442	97.63	-
Gm05	40598654	40601946	chrLG13_pilon_arrow	21497475	21494195	3293	3281	99.21	-
Gm05	40711434	40717277	chrLG14_pilon_arrow	47811224	47805371	5844	5854	97.05	-
Gm05	42106360	42107413	chrLG04_pilon_arrow	16412684	16411629	1054	1056	99.15	-
Gm06	177535	182430	chrLG08_pilon_arrow	7959912	7955001	4896	4912	98.74	-
Gm06	616747	619266	chrLG09_pilon_arrow	24451527	24449011	2520	2517	98.18	-
Gm06	1392674	1394583	chrLG20_pilon_arrow	3591380	3589489	1910	1892	96.24	-
Gm06	2509345	2515145	chrLG18_pilon_arrow	54761458	54767257	5801	5800	99.48	+
Gm06	2584363	2587369	chrLG07_pilon_arrow	36688982	36686017	3007	2966	96.72	-
Gm06	2877377	2878743	chrLG03_pilon_arrow	18633126	18631756	1367	1371	98.62	-
Gm06	2911829	2914262	chrLG09_pilon_arrow	6209106	6206682	2434	2425	99.51	-
Gm06	2986480	2988745	chrLG18_pilon_arrow	29885995	29883735	2266	2261	95.9	-
Gm06	4714282	4716723	chrLG12_pilon_arrow	20848078	20850517	2442	2440	99.22	+	artificial translocation predicted by genetic map
Gm06	4718559	4720403	chrLG12_pilon_arrow	20851457	20853299	1845	1843	97.73	+
Gm06	5522792	5524636	chrLG09_pilon_arrow	31583666	31581822	1845	1845	99.95	-
Gm06	5830512	5832576	chrLG19_pilon_arrow	3450675	3448611	2065	2065	99.56	-
Gm06	6830782	6835673	chrLG02_pilon_arrow	40665747	40660855	4892	4893	99.53	-
Gm06	6978102	6979641	chrLG07_pilon_arrow	34216411	34214874	1540	1538	99.09	-
Gm06	7186960	7188650	chrLG03_pilon_arrow	42281496	42279805	1691	1692	99.59	-
Gm06	7585728	7587197	chrLG01_pilon_arrow	40959961	40958486	1470	1476	96.27	-
Gm06	9151469	9156256	chrLG14_pilon_arrow	30014362	30009575	4788	4788	99.87	-
Gm06	9495670	9497310	chrLG10_pilon_arrow	44274740	44273106	1641	1635	97.68	-
Gm06	10168618	10170203	chrLG20_pilon_arrow	5917820	5916243	1586	1578	96.23	-
Gm06	10634897	10638621	chrLG04_pilon_arrow	15709457	15705736	3725	3722	96.08	-
Gm06	10947660	10949823	chrLG13_pilon_arrow	23864993	23862828	2164	2166	97.23	-
Gm06	11594893	11596547	chrLG09_pilon_arrow	35194693	35193029	1655	1665	97.24	-
Gm06	11795484	11800629	chrLG11_pilon_arrow	20156594	20151453	5146	5142	99.18	-
Gm06	12379921	12381882	chrLG10_pilon_arrow	22698096	22696136	1962	1961	97.25	-
Gm06	12655303	12660316	chrLG05_pilon_arrow	32046367	32041359	5014	5009	97.67	-
Gm06	12900026	12902798	chrLG14_pilon_arrow	45364899	45362125	2773	2775	97.95	-
Gm06	13284750	13286720	chrLG02_pilon_arrow	26676679	26678650	1971	1972	98.43	+
Gm06	13294046	13295499	chrLG04_pilon_arrow	42445674	42444251	1454	1424	95.19	-
Gm06	13349510	13350815	chrLG08_pilon_arrow	30005228	30003922	1306	1307	99.31	-
Gm06	14905701	14907785	chrLG02_pilon_arrow	47701974	47699905	2085	2070	96.14	-
Gm06	14961507	14963247	chrLG10_pilon_arrow	11550728	11552460	1741	1733	96.38	+
Gm06	15376383	15378101	chrLG18_pilon_arrow	17760114	17758407	1719	1708	98.31	-
Gm06	15378377	15380166	chrLG04_pilon_arrow	39676535	39674740	1790	1796	95.33	-
Gm06	15815864	15816923	chrLG10_pilon_arrow	35884259	35883200	1060	1060	99.25	-
Gm06	16524050	16534280	chrLG18_pilon_arrow	38432648	38442865	10231	10218	97.48	+
Gm06	17686073	17687310	chrLG18_pilon_arrow	12400977	12399742	1238	1236	97.98	-
Gm06	18091776	18096746	chrLG10_pilon_arrow	24871652	24866681	4971	4972	99.84	-
Gm06	18127624	18201376	chrLG10_pilon_arrow	18960048	19033816	73753	73769	99.83	+
Gm06	18201377	18202743	chrLG10_pilon_arrow	19033760	19035127	1367	1368	99.34	+
Gm06	18206749	18207975	chrLG10_pilon_arrow	19055650	19056876	1227	1227	100	+
Gm06	18583650	18586737	chrLG15_pilon_arrow	26448730	26445639	3088	3092	95.45	-
Gm06	18587324	18588982	chrLG15_pilon_arrow	26445639	26443979	1659	1661	96.52	-
Gm06	18598758	18600286	chrLG15_pilon_arrow	26442903	26441369	1529	1535	95.83	-
Gm06	18601416	18606765	chrLG13_pilon_arrow	6028394	6033750	5350	5357	98.86	+
Gm06	18807449	18813592	chrLG16_pilon_arrow	29846007	29839865	6144	6143	98.24	-
Gm06	19046042	19047265	chrLG20_pilon_arrow	32423820	32422595	1224	1226	98.21	-
Gm06	19438875	19442052	chrLG03_pilon_arrow	40783249	40780069	3178	3181	95.41	-
Gm06	20836011	20839345	chrLG14_pilon_arrow	36761265	36764653	3335	3389	95.58	+
Gm06	21384859	21387313	chrLG18_pilon_arrow	15322046	15319599	2455	2448	95.82	-
Gm06	21828574	21835058	chrLG09_pilon_arrow	31206475	31199991	6485	6485	99.15	-
Gm06	21947564	21952356	chrLG03_pilon_arrow	13354632	13359413	4793	4782	98.89	+
Gm06	22228534	22234647	chrLG03_pilon_arrow	13199554	13205666	6114	6113	99.18	+
Gm06	22291558	22295791	chrLG20_pilon_arrow	26133918	26138154	4234	4237	96.53	+
Gm06	22722869	22724792	chrLG08_pilon_arrow	11985063	11983134	1924	1930	97.31	-
Gm06	22922671	22926414	chrLG13_pilon_arrow	12209584	12205844	3744	3741	98.64	-
Gm06	22926415	22931329	chrLG13_pilon_arrow	30264812	30259872	4915	4941	99.15	-
Gm06	22931330	22933801	chrLG13_pilon_arrow	12205848	12203377	2472	2472	97.01	-
Gm06	23189615	23191447	chrLG01_pilon_arrow	16415786	16417619	1833	1834	98.69	+
Gm06	23836585	23840064	chrLG12_pilon_arrow	11907249	11903786	3480	3464	98.77	-
Gm06	23987049	23993848	chrLG16_pilon_arrow	17566356	17573116	6800	6761	96.17	+
Gm06	24056813	24061852	chrLG13_pilon_arrow	1527754	1532777	5040	5024	98.53	+
Gm06	24516321	24521851	chrLG05_pilon_arrow	9695378	9700912	5531	5535	99.39	+
Gm06	24587425	24589093	chrLG16_pilon_arrow	11394739	11396407	1669	1669	99.76	+
Gm06	25203836	25334696	chrLG01_pilon_arrow	27154632	27285545	130861	130914	99.41	+	artificial translocation predicted by genetic map
Gm06	25511627	25515345	chrLG19_pilon_arrow	22499926	22503671	3719	3746	96.3	+
Gm06	26005090	26007891	chrLG14_pilon_arrow	25356631	25353832	2802	2800	95.23	-
Gm06	26317663	26325842	chrLG10_pilon_arrow	31521151	31529335	8180	8185	99.73	+
Gm06	26336311	26337681	chrLG03_pilon_arrow	7903842	7902473	1371	1370	97.81	-
Gm06	26448474	26454024	chrLG03_pilon_arrow	28217908	28223469	5551	5562	96.58	+
Gm06	26722347	26730800	chrLG16_pilon_arrow	23262597	23254132	8454	8466	98.39	-
Gm06	27026551	27039729	chrLG01_pilon_arrow	8713627	8700489	13179	13139	97.34	-
Gm06	27043274	27057274	chrLG02_pilon_arrow	31324798	31338896	14001	14099	98.67	+	artificial translocation predicted by genetic map
Gm06	27071936	27084778	chrLG15_pilon_arrow	25490921	25503755	12843	12835	97.35	+
Gm06	27095383	27119083	chrLG02_pilon_arrow	31340190	31363912	23701	23723	99.09	+	artificial translocation predicted by genetic map
Gm06	27119308	27151692	chrLG02_pilon_arrow	31363912	31396366	32385	32455	99.32	+	artificial translocation predicted by genetic map
Gm06	27152166	27153781	chrLG02_pilon_arrow	31396679	31398294	1616	1616	99.75	+	artificial translocation predicted by genetic map
Gm06	27154827	27179579	chrLG02_pilon_arrow	31399247	31423967	24753	24721	99.58	+	artificial translocation predicted by genetic map
Gm06	27185076	27198170	chrLG02_pilon_arrow	31430047	31443143	13095	13097	99.39	+	artificial translocation predicted by genetic map
Gm06	27215360	27220077	chrLG02_pilon_arrow	31443138	31447856	4718	4719	99.6	+	artificial translocation predicted by genetic map
Gm06	27238501	27270764	chrLG02_pilon_arrow	31447851	31480120	32264	32270	99.44	+	artificial translocation predicted by genetic map
Gm06	27447385	27450715	chrLG18_pilon_arrow	34824909	34828244	3331	3336	99.73	+
Gm06	27476026	27481397	chrLG13_pilon_arrow	9554619	9549243	5372	5377	99.37	-
Gm06	27659284	27670388	chrLG18_pilon_arrow	22965648	22976736	11105	11089	98.99	+
Gm06	28209217	28211893	chrLG03_pilon_arrow	20182064	20184757	2677	2694	95.45	+
Gm06	28465975	28469766	chrLG12_pilon_arrow	28257077	28253289	3792	3789	98.39	-
Gm06	28473709	28478310	chrLG03_pilon_arrow	20184757	20180148	4602	4610	96.6	-
Gm06	29314116	29323387	chrLG20_pilon_arrow	24695337	24704625	9272	9289	98.4	+
Gm06	29353695	29356415	chrLG01_pilon_arrow	45011916	45009195	2721	2722	97.1	-
Gm06	29427852	29430004	chrLG05_pilon_arrow	10380191	10378050	2153	2142	95.32	-
Gm06	29457956	29460544	chrLG14_pilon_arrow	28422603	28420015	2589	2589	97.69	-
Gm06	29671690	29677215	chrLG19_pilon_arrow	13582054	13587583	5526	5530	99.6	+
Gm06	30659450	30663916	chrLG19_pilon_arrow	13836875	13832407	4467	4469	98.73	-
Gm06	31252033	31254173	chrLG05_pilon_arrow	12496739	12494599	2141	2141	99.86	-
Gm06	31269131	31275189	chrLG05_pilon_arrow	15533182	15539257	6059	6076	96.4	+
Gm06	31637172	31646997	chrLG01_pilon_arrow	40480144	40489945	9826	9802	97.38	+
Gm06	31827673	31832667	chrLG12_pilon_arrow	18411532	18416518	4995	4987	98.12	+
Gm06	31833290	31835676	chrLG04_pilon_arrow	13273364	13275751	2387	2388	98.91	+
Gm06	32563784	32572489	chrLG16_pilon_arrow	15251685	15260388	8706	8704	98.48	+
Gm06	32842217	32843526	chrLG12_pilon_arrow	25314929	25313608	1310	1322	99.02	-
Gm06	33700046	33703360	chrLG09_pilon_arrow	26477666	26474203	3315	3464	95.12	-
Gm06	33742195	33754749	chrLG12_pilon_arrow	24525087	24512534	12555	12554	97.58	-
Gm06	33929110	33940216	chrLG02_pilon_arrow	20637414	20648550	11107	11137	99.34	+
Gm06	34165767	34176839	chrLG17_pilon_arrow	26586037	26597134	11073	11098	97.87	+
Gm06	34597058	34599261	chrLG20_pilon_arrow	25417089	25419287	2204	2199	96.02	+
Gm06	34975238	34983169	chrLG10_pilon_arrow	17958207	17950304	7932	7904	97.93	-
Gm06	35018846	35023955	chrLG02_pilon_arrow	16383035	16388123	5110	5089	95.21	+
Gm06	35534901	35540647	chrLG09_pilon_arrow	28119591	28113829	5747	5763	97.49	-
Gm06	35725353	35727513	chrLG09_pilon_arrow	27934316	27932161	2161	2156	97.97	-
Gm06	36888482	36896614	chrLG19_pilon_arrow	20227926	20236067	8133	8142	97.75	+
Gm06	37042176	37046783	chrLG12_pilon_arrow	18307531	18302922	4608	4610	99.05	-
Gm06	37559684	37564679	chrLG17_pilon_arrow	32045720	32040724	4996	4997	99.42	-
Gm06	38217794	38224255	chrLG09_pilon_arrow	14831757	14825302	6462	6456	97.44	-
Gm06	38562439	38565298	chrLG20_pilon_arrow	28416761	28413933	2860	2829	96.27	-
Gm06	38612784	38622317	chrLG20_pilon_arrow	28405185	28395575	9534	9611	96.2	-
Gm06	38652969	38655869	chrLG10_pilon_arrow	3693302	3690417	2901	2886	98.52	-
Gm06	38668407	38669702	chrLG20_pilon_arrow	28989669	28988377	1296	1293	97.92	-
Gm06	39587136	39589072	chrLG20_pilon_arrow	26603640	26605579	1937	1940	96.96	+
Gm06	39636287	39641083	chrLG05_pilon_arrow	5232685	5227903	4797	4783	97.4	-
Gm06	39820566	39822783	chrLG08_pilon_arrow	12260469	12258249	2218	2221	98.42	-
Gm06	39954539	39955676	chrLG13_pilon_arrow	4187164	4186029	1138	1136	99.74	-
Gm06	39962374	39970460	chrLG20_pilon_arrow	3452068	3460155	8087	8088	99.94	+
Gm06	39972248	39974115	chrLG10_pilon_arrow	35466115	35467982	1868	1868	100	+
Gm06	39974218	39976906	chrLG10_pilon_arrow	35468101	35470789	2689	2689	99.85	+
Gm06	39982804	39987770	chrLG01_pilon_arrow	10528701	10523732	4967	4970	99.72	-
Gm06	40021260	40022622	chrLG01_pilon_arrow	8958057	8959423	1363	1367	98.61	+
Gm06	40054559	40059148	chrLG10_pilon_arrow	33369874	33365283	4590	4592	99.35	-
Gm06	40310074	40313149	chrLG12_pilon_arrow	9982509	9979433	3076	3077	96.3	-
Gm06	40794348	40796796	chrLG02_pilon_arrow	3043801	3041353	2449	2449	99.76	-
Gm06	40869535	40875398	chrLG03_pilon_arrow	20886976	20892824	5864	5849	98.35	+
Gm06	40917737	40923807	chrLG14_pilon_arrow	16256934	16250850	6071	6085	98.23	-
Gm06	40981066	40984126	chrLG10_pilon_arrow	22341991	22338929	3061	3063	99.35	-
Gm06	41022495	41026882	chrLG01_pilon_arrow	20921099	20916700	4388	4400	97.27	-
Gm06	41137421	41146699	chrLG17_pilon_arrow	28422963	28413685	9279	9279	99.23	-
Gm06	41280362	41285671	chrLG02_pilon_arrow	21107782	21102473	5310	5310	98.95	-
Gm06	41525901	41527810	chrLG17_pilon_arrow	26464032	26462119	1910	1914	95.94	-
Gm06	41545853	41547012	chrLG17_pilon_arrow	11646728	11645566	1160	1163	96.48	-
Gm06	41560341	41561883	chrLG15_pilon_arrow	10673044	10671499	1543	1546	97.41	-
Gm06	41619939	41621792	chrLG14_pilon_arrow	25392355	25390503	1854	1853	95.8	-
Gm06	42595917	42597140	chrLG08_pilon_arrow	2579672	2578449	1224	1224	98.29	-
Gm06	42785172	42787930	chrLG14_pilon_arrow	5316309	5313531	2759	2779	97.84	-
Gm06	43684034	43687515	chrLG04_pilon_arrow	15743089	15739616	3482	3474	96.36	-
Gm06	44298281	44300748	chrLG18_pilon_arrow	21873396	21875873	2468	2478	97.51	+
Gm06	45124712	45126898	chrLG14_pilon_arrow	42068490	42066308	2187	2183	98.54	-
Gm06	45514115	45515433	chrLG07_pilon_arrow	2352932	2351614	1319	1319	97.95	-
Gm06	45517070	45518211	chrLG02_pilon_arrow	44073828	44072685	1142	1144	98.34	-
Gm06	45524323	45526774	chrLG15_pilon_arrow	45662623	45660184	2452	2440	97.19	-
Gm06	46829542	46831363	chrLG12_pilon_arrow	373117	371309	1822	1809	97.1	-
Gm06	47175600	47179628	chrLG02_pilon_arrow	6079681	6075656	4029	4026	99.88	-
Gm06	47179729	47182958	chrLG02_pilon_arrow	6075615	6072397	3230	3219	99.41	-
Gm06	47312199	47313684	chrLG20_pilon_arrow	44901434	44899949	1486	1486	98.65	-
Gm06	48021086	48022887	chrLG04_pilon_arrow	38236371	38234579	1802	1793	95.07	-
Gm06	49755026	49758204	chrLG11_pilon_arrow	14557780	14554605	3179	3176	99.09	-
Gm06	49901141	49902514	chrLG20_pilon_arrow	24803514	24804887	1374	1374	100	+
Gm06	50404386	50406763	chrLG13_pilon_arrow	24140552	24142953	2378	2402	96.84	+	artificial translocation predicted by genetic map
Gm06	50425960	50431632	chrLG13_pilon_arrow	24184438	24178757	5673	5682	98.51	-	artificial translocation predicted by genetic map
Gm06	50431632	50434842	chrLG13_pilon_arrow	24178608	24175404	3211	3205	99.38	-	artificial translocation predicted by genetic map
Gm06	50434934	50465353	chrLG13_pilon_arrow	24175402	24144902	30420	30501	98.31	-	artificial translocation predicted by genetic map
Gm06	50465354	50470186	chrLG13_pilon_arrow	24143933	24139089	4833	4845	99.55	-	artificial translocation predicted by genetic map
Gm06	50470186	50486715	chrLG13_pilon_arrow	24138965	24122412	16530	16554	99.34	-	artificial translocation predicted by genetic map
Gm06	50493136	50496248	chrLG05_pilon_arrow	19560520	19557402	3113	3119	97.85	-
Gm06	50500178	50506170	chrLG13_pilon_arrow	24127031	24132989	5993	5959	96.16	+
Gm06	50530310	50533860	chrLG13_pilon_arrow	24133799	24137333	3551	3535	96.05	+
Gm06	50539416	50541873	chrLG13_pilon_arrow	24138112	24140554	2458	2443	96.52	+
Gm06	50734398	50738025	chrLG18_pilon_arrow	54749557	54745929	3628	3629	96.45	-
Gm06	51149690	51150848	chrLG10_pilon_arrow	9586012	9587177	1159	1166	96.92	+
Gm06	51316728	51318524	chrLG19_pilon_arrow	34473801	34472006	1797	1796	96.05	-
Gm06	51355482	51369194	chrLG13_pilon_arrow	22515552	22529269	13713	13718	99.65	+
Gm06	51381324	51388494	chrLG13_pilon_arrow	22514625	22521794	7171	7170	99.79	+
Gm06	51414534	51415851	chrLG08_pilon_arrow	43636535	43637852	1318	1318	99.77	+
Gm07	24524	26108	chrLG01_pilon_arrow	45399741	45398163	1585	1579	99.37	-
Gm07	84700	86004	chrLG10_pilon_arrow	359044	357743	1305	1302	95.72	-
Gm07	127499	130761	chrLG20_pilon_arrow	4707976	4704704	3263	3273	97.89	-
Gm07	329573	331541	chrLG17_pilon_arrow	34899009	34897052	1969	1958	97.66	-
Gm07	700568	701758	chrLG04_pilon_arrow	39126697	39125507	1191	1191	99.16	-
Gm07	888379	890281	chrLG15_pilon_arrow	40057315	40055419	1903	1897	96.9	-
Gm07	1954385	1955666	chrLG09_pilon_arrow	36269068	36267785	1282	1284	99.14	-
Gm07	2009673	2010940	chrLG04_pilon_arrow	10480165	10478898	1268	1268	98.19	-
Gm07	2075881	2077500	chrLG09_pilon_arrow	31585439	31583820	1620	1620	99.81	-
Gm07	2077577	2079947	chrLG06_pilon_arrow	5556530	5558895	2371	2366	99.66	+
Gm07	2102420	2103491	chrLG08_pilon_arrow	41147789	41146716	1072	1074	98.05	-
Gm07	2329760	2331079	chrLG06_pilon_arrow	43784825	43783507	1320	1319	98.26	-
Gm07	2462074	2464481	chrLG08_pilon_arrow	17180234	17177820	2408	2415	96.03	-
Gm07	3352227	3356265	chrLG16_pilon_arrow	8618478	8614441	4039	4038	97.63	-
Gm07	4135822	4138849	chrLG01_pilon_arrow	4762970	4759945	3028	3026	98.88	-
Gm07	4751316	4755223	chrLG12_pilon_arrow	32339800	32335902	3908	3899	95.96	-
Gm07	5780730	5783232	chrLG12_pilon_arrow	35842684	35840183	2503	2502	99.8	-
Gm07	7289491	7290828	chrLG04_pilon_arrow	31214795	31216132	1338	1338	97.01	+
Gm07	7504949	7507704	chrLG16_pilon_arrow	4861619	4864368	2756	2750	99.02	+
Gm07	8313489	8315254	chrLG16_pilon_arrow	33575441	33573676	1766	1766	99.38	-
Gm07	8348669	8349883	chrLG03_pilon_arrow	6225913	6227125	1215	1213	96.05	+
Gm07	8349977	8351527	chrLG03_pilon_arrow	6227125	6228677	1551	1553	96.07	+
Gm07	8725113	8728805	chrLG09_pilon_arrow	37714270	37710563	3693	3708	95.38	-
Gm07	8806915	8809724	chrLG08_pilon_arrow	21900122	21897294	2810	2829	96.04	-
Gm07	9347220	9351035	chrLG14_pilon_arrow	15884290	15880455	3816	3836	96.45	-
Gm07	9600917	9603730	chrLG02_pilon_arrow	28567265	28570080	2814	2816	95.68	+
Gm07	10945182	10953679	chrLG16_pilon_arrow	18435076	18443546	8498	8471	95.37	+
Gm07	10953692	10955760	chrLG16_pilon_arrow	18444627	18446704	2069	2078	95.25	+
Gm07	10963367	10968672	chrLG14_pilon_arrow	25486915	25481592	5306	5324	95.81	-
Gm07	10976600	10979307	chrLG06_pilon_arrow	24598860	24596144	2708	2717	96.13	-
Gm07	11179745	11181700	chrLG17_pilon_arrow	20737854	20735909	1956	1946	95.25	-
Gm07	11362258	11364572	chrLG12_pilon_arrow	18666592	18664249	2315	2344	97.44	-
Gm07	11744738	11746904	chrLG17_pilon_arrow	21025293	21023150	2167	2144	97.37	-
Gm07	12160272	12168263	chrLG16_pilon_arrow	25723573	25731551	7992	7979	98.01	+
Gm07	12310948	12325837	chrLG01_pilon_arrow	7158229	7173154	14890	14926	98.04	+
Gm07	12902862	12908181	chrLG18_pilon_arrow	250454	245168	5320	5287	95.75	-
Gm07	13054759	13058207	chrLG18_pilon_arrow	6779523	6776068	3449	3456	95.48	-
Gm07	13523565	13525336	chrLG06_pilon_arrow	36577953	36576187	1772	1767	96.98	-
Gm07	13529041	13530552	chrLG06_pilon_arrow	36576191	36574677	1512	1515	98.02	-
Gm07	13868146	13870435	chrLG14_pilon_arrow	41271781	41269493	2290	2289	99.87	-
Gm07	14469067	14472039	chrLG08_pilon_arrow	31448811	31451791	2973	2981	97.22	+
Gm07	14573525	14575934	chrLG20_pilon_arrow	17472784	17475209	2410	2426	97.83	+
Gm07	14578911	14581314	chrLG18_pilon_arrow	28169399	28171801	2404	2403	99.88	+
Gm07	14581314	14588552	chrLG18_pilon_arrow	28171932	28179202	7239	7271	98.52	+
Gm07	14654299	14656641	chrLG15_pilon_arrow	38112492	38110135	2343	2358	96.07	-
Gm07	14755800	14759130	chrLG12_pilon_arrow	30768930	30765623	3331	3308	95.71	-
Gm07	14961047	14962846	chrLG14_pilon_arrow	48147724	48145925	1800	1800	98.67	-
Gm07	14964530	14967313	chrLG05_pilon_arrow	26111497	26108716	2784	2782	98.74	-
Gm07	16297779	16299685	chrLG10_pilon_arrow	22034751	22032844	1907	1908	97.54	-
Gm07	16438066	16444304	chrLG01_pilon_arrow	48407985	48414233	6239	6249	99.06	+
Gm07	16799873	16801170	chrLG18_pilon_arrow	1624379	1625673	1298	1295	99.23	+
Gm07	17765684	17769223	chrLG12_pilon_arrow	11502984	11499442	3540	3543	98.22	-
Gm07	17996324	18000856	chrLG16_pilon_arrow	18242290	18246816	4533	4527	97.27	+
Gm07	18020074	18034175	chrLG16_pilon_arrow	18262586	18276655	14102	14070	97.63	+
Gm07	18494922	18496591	chrLG16_pilon_arrow	18332726	18334399	1670	1674	97.31	+
Gm07	18498272	18500857	chrLG16_pilon_arrow	18345606	18348183	2586	2578	97.27	+
Gm07	18500858	18503998	chrLG16_pilon_arrow	18363465	18366615	3141	3151	96.46	+
Gm07	18591396	18595707	chrLG16_pilon_arrow	18311320	18315606	4312	4287	96.79	+
Gm07	18603925	18606672	chrLG16_pilon_arrow	18510945	18513701	2748	2757	97.33	+
Gm07	18606673	18609181	chrLG03_pilon_arrow	15169368	15166846	2509	2523	98.54	-
Gm07	18666852	18668809	chrLG16_pilon_arrow	18374014	18375981	1958	1968	96.81	+
Gm07	19890983	19897452	chrLG12_pilon_arrow	26346466	26352937	6470	6472	98.43	+
Gm07	19971532	19972934	chrLG16_pilon_arrow	31619110	31617704	1403	1407	98.3	-
Gm07	20535876	20541123	chrLG19_pilon_arrow	22550644	22545398	5248	5247	98.57	-
Gm07	20779970	20786171	chrLG18_pilon_arrow	23359807	23353599	6202	6209	98.91	-
Gm07	20789321	20794286	chrLG18_pilon_arrow	23350972	23346007	4966	4966	99.58	-
Gm07	21308009	21309369	chrLG08_pilon_arrow	8254489	8253130	1361	1360	98.17	-
Gm07	21417004	21420046	chrLG18_pilon_arrow	20811978	20808936	3043	3043	97.21	-
Gm07	21681907	21685185	chrLG04_pilon_arrow	13236126	13232843	3279	3284	98.33	-
Gm07	21818211	21819415	chrLG09_pilon_arrow	10282638	10283842	1205	1205	99.92	+
Gm07	22098738	22104197	chrLG14_pilon_arrow	40296659	40291186	5460	5474	98.74	-
Gm07	22524092	22526467	chrLG19_pilon_arrow	33118155	33115771	2376	2385	96.08	-
Gm07	23803234	23819541	chrLG14_pilon_arrow	40290920	40307243	16308	16324	97.96	+
Gm07	24290493	24295135	chrLG18_pilon_arrow	4179562	4174928	4643	4635	99.55	-
Gm07	24438382	24442141	chrLG15_pilon_arrow	29306013	29309773	3760	3761	99.36	+
Gm07	24864590	24868796	chrLG05_pilon_arrow	13433940	13438153	4207	4214	97.97	+
Gm07	24871680	24874659	chrLG20_pilon_arrow	16201284	16204266	2980	2983	98.99	+
Gm07	24931071	24935045	chrLG15_pilon_arrow	18924561	18920573	3975	3989	97.04	-
Gm07	25005647	25014118	chrLG01_pilon_arrow	31015728	31024249	8472	8522	96.28	+
Gm07	25349980	25359743	chrLG10_pilon_arrow	27390424	27380677	9764	9748	97.47	-
Gm07	25490460	25496734	chrLG04_pilon_arrow	19661698	19655414	6275	6285	98.89	-
Gm07	25739875	25741407	chrLG16_pilon_arrow	23636100	23634566	1533	1535	97.46	-
Gm07	26554049	26557767	chrLG13_pilon_arrow	7442348	7446093	3719	3746	97.44	+
Gm07	26566755	26568085	chrLG17_pilon_arrow	31399847	31398517	1331	1331	99.55	-
Gm07	26568191	26570620	chrLG17_pilon_arrow	31397555	31395121	2430	2435	98.07	-
Gm07	27161036	27170282	chrLG18_pilon_arrow	27961389	27952145	9247	9245	98.78	-
Gm07	27251505	27253263	chrLG15_pilon_arrow	36129516	36127760	1759	1757	96.42	-
Gm07	27548033	27553268	chrLG18_pilon_arrow	40323099	40317869	5236	5231	97.46	-
Gm07	27844001	27845159	chrLG17_pilon_arrow	25641812	25640654	1159	1159	99.74	-
Gm07	27918663	27925107	chrLG01_pilon_arrow	35875377	35868934	6445	6444	98.9	-
Gm07	28013777	28014876	chrLG04_pilon_arrow	13472476	13471369	1100	1108	97.66	-
Gm07	28337067	28352932	chrLG06_pilon_arrow	31894452	31878466	15866	15987	98.41	-
Gm07	28393519	28395311	chrLG10_pilon_arrow	47678971	47677179	1793	1793	95.99	-
Gm07	29349751	29351334	chrLG01_pilon_arrow	45075148	45073564	1584	1585	97.1	-
Gm07	29669518	29685753	chrLG14_pilon_arrow	40306581	40290286	16236	16296	97.31	-
Gm07	30345139	30346445	chrLG06_pilon_arrow	31895426	31896730	1307	1305	99.24	+
Gm07	31352429	31356671	chrLG02_pilon_arrow	22672517	22676774	4243	4258	98.94	+
Gm07	32061707	32069848	chrLG19_pilon_arrow	28848467	28856609	8142	8143	97.3	+
Gm07	32412068	32414921	chrLG18_pilon_arrow	27278456	27281308	2854	2853	95.7	+
Gm07	32431873	32435907	chrLG10_pilon_arrow	12082772	12078735	4035	4038	99.55	-
Gm07	33387943	33400615	chrLG06_pilon_arrow	31892298	31879624	12673	12675	97.49	-
Gm07	34294418	34297615	chrLG09_pilon_arrow	18043797	18046974	3198	3178	97.45	+
Gm07	35130137	35131301	chrLG15_pilon_arrow	34280205	34279040	1165	1166	96.16	-
Gm07	35168200	35169739	chrLG18_pilon_arrow	40781994	40780455	1540	1540	96.36	-
Gm07	35276811	35279855	chrLG16_pilon_arrow	20571468	20568413	3045	3056	97.17	-
Gm07	35281764	35288641	chrLG16_pilon_arrow	20566406	20559540	6878	6867	97.32	-
Gm07	36127683	36132715	chrLG08_pilon_arrow	20368283	20363278	5033	5006	96.19	-
Gm07	36595766	36600675	chrLG20_pilon_arrow	238200	233334	4910	4867	96.32	-
Gm07	36602876	36606130	chrLG20_pilon_arrow	230732	227447	3255	3286	97.41	-
Gm07	36607803	36609945	chrLG20_pilon_arrow	227414	225291	2143	2124	96.01	-
Gm07	38984949	38987914	chrLG06_pilon_arrow	2568220	2565214	2966	3007	96.72	-
Gm07	41023681	41025452	chrLG14_pilon_arrow	41108722	41106933	1772	1790	96.99	-
Gm07	41206587	41207809	chrLG08_pilon_arrow	6504282	6503060	1223	1223	97.55	-
Gm07	41914155	41916294	chrLG05_pilon_arrow	29787217	29785079	2140	2139	97.95	-
Gm07	42051661	42053086	chrLG17_pilon_arrow	2467600	2466176	1426	1425	95.39	-
Gm07	42230494	42233653	chrLG01_pilon_arrow	5128974	5125807	3160	3168	96.03	-
Gm07	42661882	42667130	chrLG15_pilon_arrow	4070328	4065080	5249	5249	99.35	-
Gm07	42763048	42764540	chrLG01_pilon_arrow	54927015	54925524	1493	1492	96.6	-
Gm07	42825440	42826802	chrLG12_pilon_arrow	14066489	14065115	1363	1375	95.93	-
Gm07	43614980	43619313	chrLG01_pilon_arrow	47498558	47494228	4334	4331	95.09	-
Gm07	44225577	44227324	chrLG17_pilon_arrow	445687	443935	1748	1753	95.28	-
Gm07	44435128	44441211	chrLG02_pilon_arrow	13032962	13026897	6084	6066	99.36	-
Gm07	44538334	44539903	chrLG17_pilon_arrow	165600	164031	1570	1570	95.06	-
Gm08	3907	8136	chrLG12_pilon_arrow	34831	30596	4230	4236	96.47	-
Gm08	20596	22794	chrLG14_pilon_arrow	42086072	42088260	2199	2189	98.41	+
Gm08	241244	242659	chrLG04_pilon_arrow	41466406	41464992	1416	1415	96.26	-
Gm08	274342	277189	chrLG04_pilon_arrow	3208133	3205197	2848	2937	96.36	-
Gm08	1955438	1958100	chrLG18_pilon_arrow	9097991	9095345	2663	2647	97.83	-
Gm08	2336712	2338929	chrLG12_pilon_arrow	20822009	20819790	2218	2220	96.8	-
Gm08	2557483	2558705	chrLG06_pilon_arrow	40435242	40434019	1223	1224	98.53	-
Gm08	5873863	5875321	chrLG16_pilon_arrow	10390160	10388687	1459	1474	95.27	-
Gm08	6128312	6129521	chrLG18_pilon_arrow	17615680	17614471	1210	1210	98.27	-
Gm08	7765576	7768241	chrLG15_pilon_arrow	34507784	34505119	2666	2666	99.66	-
Gm08	7876855	7879860	chrLG02_pilon_arrow	15346585	15343610	3006	2976	97.97	-	artificial translocation predicted by genetic map
Gm08	8218724	8220083	chrLG07_pilon_arrow	21531789	21530429	1360	1361	98.17	-
Gm08	9370383	9371740	chrLG09_pilon_arrow	15182695	15184038	1358	1344	97.5	+
Gm08	9592043	9597429	chrLG11_pilon_arrow	20216090	20210705	5387	5386	98.57	-
Gm08	11486278	11488541	chrLG18_pilon_arrow	552775	550498	2264	2278	97.01	-
Gm08	11880818	11882392	chrLG04_pilon_arrow	22908380	22906828	1575	1553	97.14	-
Gm08	12140138	12142358	chrLG06_pilon_arrow	37751815	37749599	2221	2217	98.33	-
Gm08	12876119	12878198	chrLG18_pilon_arrow	50125152	50123073	2080	2080	99.9	-
Gm08	13203547	13204776	chrLG05_pilon_arrow	25293810	25292578	1230	1233	96.84	-
Gm08	13204947	13206104	chrLG05_pilon_arrow	25291501	25290345	1158	1157	96.98	-
Gm08	13819359	13826567	chrLG15_pilon_arrow	42575506	42568269	7209	7238	95.05	-
Gm08	13945378	13948477	chrLG15_pilon_arrow	42402479	42399392	3100	3088	95.14	-
Gm08	14083375	14084622	chrLG01_pilon_arrow	36599487	36598241	1248	1247	97.84	-
Gm08	14929313	14931480	chrLG09_pilon_arrow	22995609	22993443	2168	2167	97.47	-
Gm08	16418338	16423347	chrLG14_pilon_arrow	43639493	43634484	5010	5010	99.94	-
Gm08	16455618	16458062	chrLG17_pilon_arrow	21841503	21839054	2445	2450	98.98	-
Gm08	17099024	17101439	chrLG07_pilon_arrow	2489172	2486762	2416	2411	95.95	-
Gm08	17399072	17401160	chrLG07_pilon_arrow	2243164	2241073	2089	2092	95.33	-
Gm08	17912025	17914200	chrLG11_pilon_arrow	5925313	5923132	2176	2182	97.71	-
Gm08	18756582	18758110	chrLG15_pilon_arrow	277842	276312	1529	1531	97.59	-
Gm08	18968362	18974975	chrLG14_pilon_arrow	13929325	13922702	6614	6624	95.95	-
Gm08	19008573	19015125	chrLG18_pilon_arrow	19179452	19172875	6553	6578	98.68	-
Gm08	19229978	19234013	chrLG14_pilon_arrow	14071002	14066996	4036	4007	97.29	-
Gm08	19478506	19482883	chrLG01_pilon_arrow	26248526	26244187	4378	4340	96.21	-
Gm08	20750319	20753847	chrLG01_pilon_arrow	38344027	38340500	3529	3528	96.69	-
Gm08	20860982	20862717	chrLG01_pilon_arrow	50941302	50939542	1736	1761	96.48	-
Gm08	20889467	20890587	chrLG17_pilon_arrow	2327852	2326728	1121	1125	97.07	-
Gm08	21241933	21243464	chrLG03_pilon_arrow	1313145	1311629	1532	1517	97.45	-
Gm08	21595868	21602450	chrLG01_pilon_arrow	39122640	39116053	6583	6588	98.6	-
Gm08	21602451	21607328	chrLG01_pilon_arrow	39113651	39108780	4878	4872	98.85	-
Gm08	21607328	21615109	chrLG01_pilon_arrow	39108139	39100379	7782	7761	98.78	-
Gm08	22112528	22115301	chrLG16_pilon_arrow	1795433	1792633	2774	2801	95.4	-
Gm08	22902279	22905599	chrLG20_pilon_arrow	3951947	3948608	3321	3340	96.08	-
Gm08	23805896	23811440	chrLG15_pilon_arrow	21142962	21137422	5545	5541	98.49	-
Gm08	23970854	23972556	chrLG03_pilon_arrow	15602051	15600350	1703	1702	98.77	-
Gm08	24007536	24019452	chrLG04_pilon_arrow	25485855	25497798	11917	11944	99.2	+
Gm08	24529964	24534635	chrLG03_pilon_arrow	11054637	11049973	4672	4665	96.17	-
Gm08	24545987	24559237	chrLG18_pilon_arrow	22976736	22963542	13251	13195	98.64	-
Gm08	24615343	24616563	chrLG19_pilon_arrow	11189901	11191121	1221	1221	99.67	+
Gm08	25213872	25219326	chrLG13_pilon_arrow	1531451	1525985	5455	5467	98.88	-
Gm08	25322726	25327365	chrLG16_pilon_arrow	22638456	22643095	4640	4640	99.14	+
Gm08	25619217	25626461	chrLG09_pilon_arrow	24962812	24955646	7245	7167	95.48	-
Gm08	26131619	26133383	chrLG12_pilon_arrow	26548860	26550600	1765	1741	97.56	+
Gm08	26547725	26554536	chrLG19_pilon_arrow	25111438	25118209	6812	6772	95.96	+
Gm08	26576119	26578052	chrLG04_pilon_arrow	22583452	22581518	1934	1935	97.84	-
Gm08	26709582	26716616	chrLG10_pilon_arrow	28039798	28032767	7035	7032	99.09	-
Gm08	27869423	27873454	chrLG09_pilon_arrow	12963985	12959935	4032	4051	98.87	-
Gm08	28313166	28315138	chrLG10_pilon_arrow	19514040	19516011	1973	1972	96.66	+
Gm08	28427808	28435399	chrLG09_pilon_arrow	25035050	25027453	7592	7598	98	-
Gm08	28580149	28592791	chrLG03_pilon_arrow	20717784	20730397	12643	12614	98.79	+
Gm08	28619125	28622405	chrLG03_pilon_arrow	8520353	8523644	3281	3292	96.97	+
Gm08	28908608	28913912	chrLG14_pilon_arrow	14196403	14191145	5305	5259	97.97	-
Gm08	29434363	29436078	chrLG17_pilon_arrow	23787569	23785823	1716	1747	96.85	-
Gm08	29990307	29998274	chrLG04_pilon_arrow	25492419	25500439	7968	8021	98.52	+
Gm08	30180803	30188854	chrLG17_pilon_arrow	20096903	20088846	8052	8058	99.34	-
Gm08	30853661	30857327	chrLG18_pilon_arrow	16561562	16565227	3667	3666	99.86	+
Gm08	31008804	31014401	chrLG10_pilon_arrow	18938844	18933258	5598	5587	98.27	-
Gm08	31014530	31016643	chrLG10_pilon_arrow	18933258	18931146	2114	2113	96.42	-
Gm08	31621249	31623964	chrLG18_pilon_arrow	16559789	16562504	2716	2716	99.85	+
Gm08	31773596	31781579	chrLG06_pilon_arrow	24421325	24413354	7984	7972	98.33	-
Gm08	31957839	31961908	chrLG07_pilon_arrow	25232719	25228663	4070	4057	96.68	-
Gm08	32064748	32066111	chrLG14_pilon_arrow	39286908	39285545	1364	1364	97.87	-
Gm08	32070847	32073212	chrLG20_pilon_arrow	16927565	16925189	2366	2377	96.31	-
Gm08	32091909	32094963	chrLG20_pilon_arrow	1451719	1448668	3055	3052	96.46	-
Gm08	32096087	32098151	chrLG20_pilon_arrow	1448675	1446598	2065	2078	96.49	-
Gm08	33262530	33263836	chrLG06_pilon_arrow	13380538	13379233	1307	1306	99.31	-
Gm08	33322726	33323781	chrLG02_pilon_arrow	7982501	7981446	1056	1056	99.34	-
Gm08	33323810	33326695	chrLG02_pilon_arrow	7981158	7978278	2886	2881	97.44	-
Gm08	34319533	34327547	chrLG18_pilon_arrow	20437819	20445856	8015	8038	97.33	+
Gm08	34441086	34457939	chrLG04_pilon_arrow	25481555	25498436	16854	16882	99	+
Gm08	34529379	34531429	chrLG05_pilon_arrow	11663614	11665721	2051	2108	96.92	+
Gm08	36797640	36804265	chrLG03_pilon_arrow	15429281	15422669	6626	6613	95.46	-
Gm08	36968914	36971755	chrLG11_pilon_arrow	20421586	20418745	2842	2842	96.6	-
Gm08	37375855	37378282	chrLG15_pilon_arrow	4538129	4535701	2428	2429	97.33	-
Gm08	37622710	37628064	chrLG19_pilon_arrow	11195252	11189901	5355	5352	99.7	-
Gm08	37957073	37958799	chrLG04_pilon_arrow	18246623	18244899	1727	1725	97.97	-
Gm08	38546071	38547254	chrLG18_pilon_arrow	3535852	3534672	1184	1181	97.73	-
Gm08	39036781	39038544	chrLG18_pilon_arrow	30638491	30636734	1764	1758	95.75	-
Gm08	39756578	39757765	chrLG01_pilon_arrow	34402046	34400858	1188	1189	99.33	-
Gm08	41984287	41992054	chrLG15_pilon_arrow	10193620	10185803	7768	7818	97.78	-
Gm08	42042296	42044616	chrLG18_pilon_arrow	14540283	14537962	2321	2322	95.14	-
Gm08	42436029	42438436	chrLG18_pilon_arrow	36444316	36441910	2408	2407	99.92	-
Gm08	42696672	42701232	chrLG04_pilon_arrow	34807812	34803244	4561	4569	98.23	-
Gm08	43206205	43208036	chrLG09_pilon_arrow	17696509	17694684	1832	1826	96.9	-
Gm08	43246229	43248724	chrLG09_pilon_arrow	17862460	17859985	2496	2476	95.08	-
Gm08	43307873	43316319	chrLG02_pilon_arrow	29535886	29527440	8447	8447	99.81	-
Gm08	43608900	43611679	chrLG02_pilon_arrow	26682450	26685227	2780	2778	97.39	+
Gm08	43801474	43804754	chrLG06_pilon_arrow	19026762	19023469	3281	3294	95.91	-
Gm08	44941157	44942434	chrLG01_pilon_arrow	11357779	11356498	1278	1282	96.96	-
Gm08	45389369	45391481	chrLG05_pilon_arrow	25484780	25482653	2113	2128	96.82	-
Gm08	45392590	45393661	chrLG07_pilon_arrow	2122734	2121663	1072	1072	97.96	-
Gm08	46725795	46728001	chrLG05_pilon_arrow	7665733	7663529	2207	2205	95.88	-
Gm08	47632836	47634748	chrLG18_pilon_arrow	41161779	41159880	1913	1900	96.92	-
Gm08	47827374	47831065	chrLG06_pilon_arrow	49366667	49370365	3692	3699	98.79	+
Gm09	20309	22296	chrLG17_pilon_arrow	39912090	39910121	1988	1970	95.3	-
Gm09	101014	105898	chrLG12_pilon_arrow	35311323	35306439	4885	4885	98.36	-
Gm09	1684533	1686002	chrLG05_pilon_arrow	7068467	7066996	1470	1472	95.93	-
Gm09	2533711	2541134	chrLG03_pilon_arrow	1241799	1234380	7424	7420	96.38	-
Gm09	3635840	3641337	chrLG15_pilon_arrow	20930632	20925128	5498	5505	96.11	-
Gm09	3641965	3645341	chrLG15_pilon_arrow	20924545	20921207	3377	3339	95.77	-
Gm09	3834343	3838098	chrLG17_pilon_arrow	13380276	13376523	3756	3754	95.82	-
Gm09	4599473	4601349	chrLG12_pilon_arrow	16495248	16493378	1877	1871	97.5	-
Gm09	4912396	4917358	chrLG10_pilon_arrow	45143258	45138295	4963	4964	95.15	-
Gm09	6130516	6132009	chrLG14_pilon_arrow	10925337	10923845	1494	1493	99.93	-
Gm09	6250664	6255523	chrLG20_pilon_arrow	2793386	2788517	4860	4870	98.34	-
Gm09	6381015	6386065	chrLG08_pilon_arrow	20368343	20363278	5051	5066	97.21	-
Gm09	6770059	6771970	chrLG20_pilon_arrow	46543914	46542004	1912	1911	95.32	-
Gm09	7642789	7644173	chrLG08_pilon_arrow	2017201	2015816	1385	1386	99.57	-
Gm09	8134554	8136181	chrLG10_pilon_arrow	36038185	36036560	1628	1626	98.46	-
Gm09	8643642	8647849	chrLG19_pilon_arrow	43417619	43413405	4208	4215	98.67	-
Gm09	8833070	8837809	chrLG15_pilon_arrow	26336407	26331707	4740	4701	97.3	-
Gm09	9363336	9364638	chrLG04_pilon_arrow	2563055	2561725	1303	1331	96.92	-
Gm09	10009173	10015399	chrLG04_pilon_arrow	8971617	8965394	6227	6224	97.05	-
Gm09	10045717	10049833	chrLG03_pilon_arrow	15180867	15176750	4117	4118	98.49	-
Gm09	10362967	10371188	chrLG18_pilon_arrow	26055488	26063713	8222	8226	96.87	+
Gm09	10800172	10801423	chrLG06_pilon_arrow	42867943	42869201	1252	1259	99.05	+
Gm09	10874948	10880317	chrLG16_pilon_arrow	36602858	36608228	5370	5371	99.72	+
Gm09	12208595	12210188	chrLG19_pilon_arrow	32139448	32137856	1594	1593	97.37	-
Gm09	13107489	13109960	chrLG18_pilon_arrow	38545743	38543272	2472	2472	99.6	-
Gm09	13554644	13569408	chrLG02_pilon_arrow	31107357	31092587	14765	14771	99.34	-	artificial translocation predicted by genetic map
Gm09	13589793	13614570	chrLG02_pilon_arrow	31092598	31067818	24778	24781	99.57	-	artificial translocation predicted by genetic map
Gm09	13617132	13628758	chrLG02_pilon_arrow	31067819	31056224	11627	11596	99.42	-	artificial translocation predicted by genetic map
Gm09	13631276	13633240	chrLG02_pilon_arrow	31056186	31054222	1965	1965	99.59	-	artificial translocation predicted by genetic map
Gm09	13669027	13677950	chrLG04_pilon_arrow	22059516	22068384	8924	8869	95.76	+	artificial translocation predicted by genetic map
Gm09	13737364	13742937	chrLG02_pilon_arrow	35571690	35566120	5574	5571	97.66	-	artificial translocation predicted by genetic map
Gm09	13981648	14007588	chrLG02_pilon_arrow	31324803	31298841	25941	25963	99.45	-	artificial translocation predicted by genetic map
Gm09	14097958	14129217	chrLG02_pilon_arrow	31221412	31190153	31260	31260	99.61	-	artificial translocation predicted by genetic map
Gm09	14291845	14294922	chrLG04_pilon_arrow	26692733	26695810	3078	3078	97.99	+
Gm09	14424403	14425746	chrLG08_pilon_arrow	9389627	9388268	1344	1360	97.13	-
Gm09	14850015	14857283	chrLG04_pilon_arrow	16272066	16264805	7269	7262	98.14	-
Gm09	15150821	15152241	chrLG19_pilon_arrow	30544805	30543386	1421	1420	97.04	-
Gm09	15344181	15351163	chrLG18_pilon_arrow	42666348	42659362	6983	6987	98.64	-
Gm09	16023877	16026439	chrLG02_pilon_arrow	33956539	33959102	2563	2564	95.45	+
Gm09	16130837	16138538	chrLG20_pilon_arrow	16186046	16193758	7702	7713	95.26	+
Gm09	16384799	16389311	chrLG16_pilon_arrow	21798721	21794244	4513	4478	95.94	-
Gm09	17939497	17943322	chrLG12_pilon_arrow	25604032	25607859	3826	3828	99.74	+
Gm09	18395418	18397243	chrLG08_pilon_arrow	38902181	38900350	1826	1832	96.85	-
Gm09	18410241	18413538	chrLG04_pilon_arrow	37475492	37472185	3298	3308	96.68	-
Gm09	18560408	18562899	chrLG08_pilon_arrow	38942124	38939631	2492	2494	95.75	-
Gm09	18579642	18587281	chrLG14_pilon_arrow	23756259	23748629	7640	7631	95.27	-
Gm09	19257684	19262465	chrLG05_pilon_arrow	29972803	29968013	4782	4791	95.85	-
Gm09	19490594	19492741	chrLG08_pilon_arrow	5298292	5296145	2148	2148	99.44	-
Gm09	19744414	19893404	chrLG01_pilon_arrow	39865637	39716653	148991	148985	99.96	-	artificial translocation predicted by genetic map
Gm09	19901006	19905419	chrLG01_pilon_arrow	39705271	39700857	4414	4415	98.03	-	artificial translocation predicted by genetic map
Gm09	19905688	19928011	chrLG01_pilon_arrow	39699445	39677142	22324	22304	98.82	-	artificial translocation predicted by genetic map
Gm09	20145380	20273098	chrLG01_pilon_arrow	39459280	39331560	127719	127721	99.97	-	artificial translocation predicted by genetic map
Gm09	20276113	20279509	chrLG01_pilon_arrow	39330430	39327031	3397	3400	98.65	-	artificial translocation predicted by genetic map
Gm09	21428284	21431966	chrLG01_pilon_arrow	13837267	13840947	3683	3681	97.53	+	artificial translocation predicted by genetic map
Gm09	21742129	21749827	chrLG02_pilon_arrow	21229679	21221997	7699	7683	96.19	-
Gm09	21941082	21942647	chrLG14_pilon_arrow	29558881	29557315	1566	1567	96.94	-
Gm09	22359574	22365850	chrLG07_pilon_arrow	11194721	11188474	6277	6248	98.25	-
Gm09	22500707	22501870	chrLG04_pilon_arrow	16411383	16410220	1164	1164	98.28	-
Gm09	22805436	22811851	chrLG20_pilon_arrow	12496355	12502752	6416	6398	98.62	+
Gm09	22869723	22877179	chrLG17_pilon_arrow	25789041	25781560	7457	7482	97.34	-
Gm09	22979525	22985006	chrLG10_pilon_arrow	16373951	16368537	5482	5415	95.85	-
Gm09	22985046	22988505	chrLG10_pilon_arrow	14672972	14676422	3460	3451	98.07	+
Gm09	23224896	23229333	chrLG04_pilon_arrow	30259066	30263534	4438	4469	98.15	+
Gm09	23328008	23331139	chrLG17_pilon_arrow	33562731	33565870	3132	3140	97.8	+
Gm09	23340357	23342684	chrLG08_pilon_arrow	15048219	15045890	2328	2330	97.34	-
Gm09	23845817	23852730	chrLG06_pilon_arrow	24414409	24421324	6914	6916	98.89	+
Gm09	24330749	24336843	chrLG13_pilon_arrow	1529648	1523556	6095	6093	99.38	-
Gm09	24672486	24678707	chrLG02_pilon_arrow	38527484	38521276	6222	6209	98.46	-
Gm09	24723922	24726074	chrLG14_pilon_arrow	6639152	6636980	2153	2173	97.2	-
Gm09	24728523	24730832	chrLG14_pilon_arrow	6634833	6632505	2310	2329	95.09	-
Gm09	25124383	25128445	chrLG08_pilon_arrow	37045336	37041274	4063	4063	98.35	-
Gm09	25290177	25302779	chrLG17_pilon_arrow	17143883	17156506	12603	12624	97.28	+
Gm09	25792212	25801455	chrLG03_pilon_arrow	8523645	8532855	9244	9211	98.5	+
Gm09	26093923	26095493	chrLG06_pilon_arrow	27402463	27404027	1571	1565	98.35	+
Gm09	26216575	26222882	chrLG13_pilon_arrow	13053227	13046927	6308	6301	97.84	-
Gm09	26298052	26300574	chrLG18_pilon_arrow	23605064	23602543	2523	2522	98.69	-
Gm09	26356059	26359214	chrLG10_pilon_arrow	14106797	14109951	3156	3155	97.41	+
Gm09	26359215	26362588	chrLG16_pilon_arrow	20518891	20515515	3374	3377	98.08	-
Gm09	26795876	26797809	chrLG04_pilon_arrow	23195283	23197178	1934	1896	95.78	+
Gm09	27342378	27351171	chrLG05_pilon_arrow	14844683	14835894	8794	8790	98.89	-
Gm09	27397147	27399167	chrLG16_pilon_arrow	15285130	15287144	2021	2015	97.48	+
Gm09	27540871	27557177	chrLG19_pilon_arrow	17430219	17413914	16307	16306	97.3	-
Gm09	27780690	27793271	chrLG06_pilon_arrow	34569044	34556461	12582	12584	97.61	-
Gm09	28370933	28375778	chrLG02_pilon_arrow	42558612	42553765	4846	4848	96.08	-
Gm09	28579744	28582064	chrLG06_pilon_arrow	39856034	39853710	2321	2325	98.93	-
Gm09	29210696	29213212	chrLG06_pilon_arrow	625802	623283	2517	2520	98.18	-
Gm09	29759861	29768867	chrLG05_pilon_arrow	18611340	18602361	9007	8980	95.74	-
Gm09	29776847	29785182	chrLG08_pilon_arrow	29344633	29336302	8336	8332	97.58	-
Gm09	30543182	30550324	chrLG15_pilon_arrow	24628675	24635836	7143	7162	98.73	+
Gm09	30933854	30936314	chrLG06_pilon_arrow	34992147	34994619	2461	2473	95.6	+
Gm09	30953653	30956050	chrLG17_pilon_arrow	26597918	26600313	2398	2396	99.25	+
Gm09	31025901	31031656	chrLG06_pilon_arrow	35145800	35151548	5756	5749	97.49	+
Gm09	31177296	31178429	chrLG07_pilon_arrow	5645358	5644227	1134	1132	98.59	-
Gm09	31394642	31398658	chrLG12_pilon_arrow	13552695	13548651	4017	4045	97.5	-
Gm09	32708320	32710612	chrLG10_pilon_arrow	33916211	33913919	2293	2293	99.04	-
Gm09	32710742	32714456	chrLG10_pilon_arrow	33913832	33910118	3715	3715	100	-
Gm09	32714721	32716599	chrLG10_pilon_arrow	33909853	33907976	1879	1878	99.95	-
Gm09	33507732	33512452	chrLG13_pilon_arrow	17737965	17733242	4721	4724	98.07	-
Gm09	33890720	33895539	chrLG11_pilon_arrow	23579496	23574692	4820	4805	96.57	-
Gm09	33938385	33940531	chrLG05_pilon_arrow	5750915	5748781	2147	2135	95.27	-
Gm09	34002293	34007427	chrLG11_pilon_arrow	9387822	9382686	5135	5137	98.97	-
Gm09	34141029	34143252	chrLG12_pilon_arrow	5994550	5992315	2224	2236	95.55	-
Gm09	34450716	34460044	chrLG06_pilon_arrow	5557359	5548068	9329	9292	99.21	-
Gm09	35212665	35216283	chrLG14_pilon_arrow	14862051	14865669	3619	3619	99.86	+
Gm09	36018525	36022602	chrLG10_pilon_arrow	35888253	35884176	4078	4078	99.44	-
Gm09	36425233	36428277	chrLG17_pilon_arrow	19990660	19987611	3045	3050	95.7	-
Gm09	36949839	36954907	chrLG01_pilon_arrow	1218162	1213096	5069	5067	99.78	-
Gm09	37247833	37254799	chrLG12_pilon_arrow	21804217	21797248	6967	6970	97.05	-
Gm09	37401129	37405289	chrLG13_pilon_arrow	12984653	12988813	4161	4161	99.01	+
Gm09	37940479	37942774	chrLG13_pilon_arrow	19982283	19979997	2296	2287	96.66	-
Gm09	38119999	38123491	chrLG16_pilon_arrow	32918448	32921944	3493	3497	99.54	+
Gm09	38177121	38178785	chrLG06_pilon_arrow	11621932	11620278	1665	1655	97.24	-
Gm09	38187680	38189348	chrLG14_pilon_arrow	32271167	32272842	1669	1676	95.8	+
Gm09	38354583	38356492	chrLG17_pilon_arrow	3177961	3176057	1910	1905	95.2	-
Gm09	38376737	38378768	chrLG18_pilon_arrow	45293984	45291922	2032	2063	95.01	-
Gm09	38542807	38545240	chrLG14_pilon_arrow	6105027	6102592	2434	2436	97.14	-
Gm09	38754838	38756176	chrLG19_pilon_arrow	5156199	5154866	1339	1334	97.62	-
Gm09	38885044	38886488	chrLG06_pilon_arrow	42869201	42867738	1445	1464	96	-
Gm09	39029519	39032382	chrLG01_pilon_arrow	50012073	50009209	2864	2865	99.93	-
Gm09	39556037	39559341	chrLG15_pilon_arrow	29868161	29871454	3305	3294	95.89	+
Gm09	39666470	39667951	chrLG04_pilon_arrow	8728239	8726759	1482	1481	97.91	-
Gm09	40686600	40688947	chrLG16_pilon_arrow	32872429	32870082	2348	2348	99.74	-
Gm09	40784099	40787804	chrLG07_pilon_arrow	8875674	8871982	3706	3693	95.3	-
Gm09	40804275	40808989	chrLG15_pilon_arrow	9616683	9611969	4715	4715	95.4	-
Gm09	40809831	40812347	chrLG15_pilon_arrow	9610822	9608297	2517	2526	97.44	-
Gm09	41721267	41726444	chrLG12_pilon_arrow	2605477	2600272	5178	5206	96.57	-
Gm09	42009733	42014035	chrLG17_pilon_arrow	29227815	29232115	4303	4301	99.79	+
Gm09	42140305	42144987	chrLG15_pilon_arrow	15965720	15961031	4683	4690	95.46	-
Gm09	42925256	42927147	chrLG07_pilon_arrow	38634557	38632663	1892	1895	99.37	-
Gm09	43240619	43242147	chrLG03_pilon_arrow	8407204	8408718	1529	1515	96.41	+
Gm09	43587496	43591146	chrLG03_pilon_arrow	35435879	35432229	3651	3651	99.73	-
Gm09	43592060	43596737	chrLG01_pilon_arrow	29820039	29815426	4678	4614	97.17	-
Gm09	44395801	44399715	chrLG14_pilon_arrow	33887190	33883278	3915	3913	98.47	-
Gm09	44584129	44587768	chrLG14_pilon_arrow	15194754	15191113	3640	3642	99.67	-
Gm09	44739621	44743514	chrLG11_pilon_arrow	14654535	14658429	3894	3895	99.28	+
Gm09	44810508	44861557	chrLG14_pilon_arrow	15257903	15206839	51050	51065	99.68	-
Gm09	45433621	45436403	chrLG12_pilon_arrow	448012	445228	2783	2785	95.09	-
Gm09	46001582	46003314	chrLG07_pilon_arrow	4472048	4473822	1733	1775	96.51	+
Gm09	46055860	46068965	chrLG04_pilon_arrow	7946991	7933883	13106	13109	96.76	-
Gm09	47401142	47402853	chrLG18_pilon_arrow	50198958	50197268	1712	1691	95.06	-
Gm09	47842058	47843530	chrLG18_pilon_arrow	49557682	49556201	1473	1482	95.08	-
Gm09	48078088	48079931	chrLG19_pilon_arrow	25929400	25927550	1844	1851	98.54	-
Gm09	48481138	48483782	chrLG13_pilon_arrow	3076408	3073763	2645	2646	99.02	-
Gm09	48486604	48490220	chrLG13_pilon_arrow	3073761	3070130	3617	3632	98.35	-
Gm09	49279845	49281331	chrLG19_pilon_arrow	33790757	33789274	1487	1484	98.25	-
Gm09	49361549	49363794	chrLG19_pilon_arrow	33807124	33804879	2246	2246	97.02	-
Gm09	49776584	49778332	chrLG20_pilon_arrow	327044	325300	1749	1745	95.95	-
Gm09	49779125	49785677	chrLG20_pilon_arrow	317422	310864	6553	6559	95.92	-
Gm09	49908880	49910658	chrLG10_pilon_arrow	40835817	40834052	1779	1766	95.96	-
Gm09	49947129	49949346	chrLG17_pilon_arrow	11947202	11944994	2218	2209	96.8	-
Gm10	151230	152643	chrLG04_pilon_arrow	34326964	34325551	1414	1414	96.46	-
Gm10	359028	360329	chrLG07_pilon_arrow	71889	70585	1302	1305	95.64	-
Gm10	781806	787072	chrLG14_pilon_arrow	46836592	46841856	5267	5265	99.68	+
Gm10	1917946	1919041	chrLG11_pilon_arrow	14558549	14559644	1096	1096	99.82	+
Gm10	2065572	2070881	chrLG02_pilon_arrow	15248739	15243397	5310	5343	95.22	-
Gm10	2508559	2510333	chrLG06_pilon_arrow	18317783	18316007	1775	1777	97.69	-
Gm10	2623164	2633022	chrLG02_pilon_arrow	14654082	14644226	9859	9857	96.49	-
Gm10	2634251	2636162	chrLG02_pilon_arrow	14642915	14641013	1912	1903	95.45	-
Gm10	3695424	3699217	chrLG06_pilon_arrow	36582494	36578705	3794	3790	98.66	-	artificial translocation predicted by genetic map
Gm10	4781970	4783186	chrLG02_pilon_arrow	13028121	13026904	1217	1218	99.75	-
Gm10	7033222	7035335	chrLG07_pilon_arrow	8582851	8584969	2114	2119	97.55	+
Gm10	7036973	7039107	chrLG09_pilon_arrow	30144874	30142737	2135	2138	95.03	-
Gm10	7039107	7043260	chrLG09_pilon_arrow	30142618	30138464	4154	4155	96.56	-
Gm10	7085509	7087768	chrLG06_pilon_arrow	20404501	20402240	2260	2262	98.63	-
Gm10	7089141	7092097	chrLG06_pilon_arrow	20400444	20397487	2957	2958	98.58	-
Gm10	7416958	7423171	chrLG01_pilon_arrow	33975388	33981599	6214	6212	99.86	+
Gm10	7579665	7581557	chrLG15_pilon_arrow	15647262	15645368	1893	1895	96.89	-
Gm10	7582425	7584371	chrLG06_pilon_arrow	43617129	43615192	1947	1938	97.95	-
Gm10	7888097	7889487	chrLG02_pilon_arrow	17617880	17616490	1391	1391	95.54	-
Gm10	9295632	9297883	chrLG12_pilon_arrow	32504063	32501812	2252	2252	97.25	-
Gm10	9383387	9386063	chrLG09_pilon_arrow	2638979	2636284	2677	2696	95.25	-
Gm10	9455446	9464659	chrLG17_pilon_arrow	22563355	22554130	9214	9226	99.01	-
Gm10	9501443	9503243	chrLG18_pilon_arrow	50794354	50792552	1801	1803	97.84	-
Gm10	9503243	9504350	chrLG18_pilon_arrow	50788165	50787058	1108	1108	98.19	-
Gm10	9915494	9919497	chrLG18_pilon_arrow	49846420	49842420	4004	4001	97.48	-
Gm10	10205463	10206627	chrLG06_pilon_arrow	49165465	49164307	1165	1159	96.92	-
Gm10	11840714	11845337	chrLG19_pilon_arrow	45098915	45103542	4624	4628	98.9	+
Gm10	11887728	11888766	chrLG16_pilon_arrow	388884	387846	1039	1039	99.23	-
Gm10	12368231	12372950	chrLG08_pilon_arrow	23529612	23524929	4720	4684	97.01	-
Gm10	12755420	12765038	chrLG01_pilon_arrow	35875377	35865766	9619	9612	99.11	-
Gm10	12872154	12873886	chrLG06_pilon_arrow	15020614	15018874	1733	1741	96.38	-
Gm10	13109695	13117849	chrLG13_pilon_arrow	18525549	18517444	8155	8106	97.88	-
Gm10	13384766	13388026	chrLG03_pilon_arrow	36827442	36824196	3261	3247	99.26	-
Gm10	13455617	13456790	chrLG04_pilon_arrow	17729049	17727874	1174	1176	98.81	-
Gm10	13460840	13464204	chrLG14_pilon_arrow	28967224	28963890	3365	3335	96.29	-
Gm10	14116945	14123209	chrLG07_pilon_arrow	22979710	22973386	6265	6325	97.88	-
Gm10	14504676	14506056	chrLG02_pilon_arrow	18915177	18913792	1381	1386	96.83	-
Gm10	14646081	14652291	chrLG13_pilon_arrow	2340550	2346793	6211	6244	98.72	+
Gm10	15738822	15744141	chrLG07_pilon_arrow	20823610	20818287	5320	5324	97.17	-
Gm10	15931472	15943948	chrLG18_pilon_arrow	24767417	24779923	12477	12507	98.59	+
Gm10	16274019	16280279	chrLG02_pilon_arrow	19611667	19617991	6261	6325	97.11	+
Gm10	16460530	16462179	chrLG09_pilon_arrow	16193365	16191716	1650	1650	98.55	-
Gm10	16462180	16467946	chrLG09_pilon_arrow	16191168	16185402	5767	5767	99.05	-
Gm10	16474096	16480280	chrLG06_pilon_arrow	39859909	39853710	6185	6200	98.28	-
Gm10	16540594	16543092	chrLG08_pilon_arrow	25199768	25197274	2499	2495	96.06	-
Gm10	16961904	16965399	chrLG04_pilon_arrow	7425039	7421537	3496	3503	97.26	-
Gm10	16984104	16985491	chrLG04_pilon_arrow	7419864	7418476	1388	1389	97.7	-
Gm10	17199505	17205305	chrLG13_pilon_arrow	8514307	8520111	5801	5805	96.91	+
Gm10	17205574	17211594	chrLG19_pilon_arrow	14978645	14984663	6021	6019	99.2	+
Gm10	17214783	17217441	chrLG13_pilon_arrow	8520247	8522918	2659	2672	96.9	+
Gm10	17418264	17420338	chrLG08_pilon_arrow	97177	99252	2075	2076	99.95	+
Gm10	17423841	17426774	chrLG01_pilon_arrow	16043932	16040983	2934	2950	99.22	-
Gm10	17531267	17541887	chrLG07_pilon_arrow	31559938	31549371	10621	10568	97.88	-
Gm10	17728524	17730403	chrLG12_pilon_arrow	16466704	16464825	1880	1880	99.95	-
Gm10	17741941	17743475	chrLG13_pilon_arrow	6649428	6650963	1535	1536	99.22	+
Gm10	18126051	18134617	chrLG16_pilon_arrow	24505610	24514180	8567	8571	97.64	+
Gm10	18460740	18463170	chrLG14_pilon_arrow	12826233	12823775	2431	2459	95.57	-
Gm10	19330177	19332778	chrLG03_pilon_arrow	7945145	7947738	2602	2594	98.35	+
Gm10	20857862	20869393	chrLG18_pilon_arrow	23646540	23635005	11532	11536	97.82	-
Gm10	21504814	21508615	chrLG07_pilon_arrow	39331711	39327898	3802	3814	98.45	-
Gm10	22022569	22024540	chrLG08_pilon_arrow	29221686	29219714	1972	1973	96.71	-
Gm10	22092034	22098487	chrLG06_pilon_arrow	32587762	32581287	6454	6476	97.97	-
Gm10	22414912	22420947	chrLG04_pilon_arrow	22505428	22511438	6036	6011	96.74	+
Gm10	22685634	22688544	chrLG16_pilon_arrow	6846994	6844087	2911	2908	96.12	-
Gm10	22810188	22818100	chrLG06_pilon_arrow	35704163	35712094	7913	7932	98.06	+
Gm10	23031678	23035794	chrLG04_pilon_arrow	21788111	21783999	4117	4113	98.09	-
Gm10	23063569	23068084	chrLG06_pilon_arrow	44457272	44452760	4516	4513	99.09	-
Gm10	23068375	23071372	chrLG06_pilon_arrow	44451671	44448664	2998	3008	98.9	-
Gm10	23434683	23439342	chrLG03_pilon_arrow	798552	793852	4660	4701	95.09	-
Gm10	23609227	23610546	chrLG15_pilon_arrow	11760972	11759647	1320	1326	95.79	-
Gm10	24459930	24462424	chrLG02_pilon_arrow	32159650	32162153	2495	2504	95.41	+
Gm10	25102502	25104898	chrLG14_pilon_arrow	15208384	15210781	2397	2398	99.87	+
Gm10	25531461	25532939	chrLG11_pilon_arrow	7614307	7612819	1479	1489	95.33	-
Gm10	25631715	25633875	chrLG17_pilon_arrow	32329852	32327694	2161	2159	98.89	-
Gm10	25655232	25657144	chrLG05_pilon_arrow	31846005	31844097	1913	1909	98.33	-
Gm10	25749328	25754519	chrLG06_pilon_arrow	38793493	38788278	5192	5216	99.29	-
Gm10	25773448	25786364	chrLG11_pilon_arrow	23666598	23679522	12917	12925	99.44	+
Gm10	26012220	26019385	chrLG19_pilon_arrow	13587584	13594735	7166	7152	98.68	+
Gm10	26187584	26189544	chrLG06_pilon_arrow	12403095	12401135	1961	1961	97.2	-
Gm10	26217521	26226141	chrLG03_pilon_arrow	29524335	29515677	8621	8659	96.69	-
Gm10	26290910	26304322	chrLG06_pilon_arrow	34569044	34555625	13413	13420	97.49	-
Gm10	26647106	26655796	chrLG16_pilon_arrow	11170083	11161379	8691	8705	96.57	-
Gm10	27238015	27239544	chrLG20_pilon_arrow	46600302	46598773	1530	1530	98.89	-
Gm10	27534099	27536592	chrLG13_pilon_arrow	34182156	34179632	2494	2525	96.01	-
Gm10	27536706	27538053	chrLG15_pilon_arrow	38851071	38849717	1348	1355	96.17	-
Gm10	27894632	27902650	chrLG20_pilon_arrow	22787627	22795649	8019	8023	98.61	+
Gm10	28053782	28055052	chrLG11_pilon_arrow	7124083	7122806	1271	1278	95.78	-
Gm10	28434169	28435979	chrLG06_pilon_arrow	16131609	16129812	1811	1798	98.12	-
Gm10	28837119	28842981	chrLG02_pilon_arrow	33983581	33989455	5863	5875	95.98	+
Gm10	28843518	28844916	chrLG02_pilon_arrow	33993409	33994798	1399	1390	97.21	+
Gm10	28846637	28849626	chrLG02_pilon_arrow	33996014	33999011	2990	2998	96.66	+
Gm10	29020050	29023618	chrLG14_pilon_arrow	32171454	32175029	3569	3576	98.8	+
Gm10	29135482	29142401	chrLG20_pilon_arrow	22787627	22794547	6920	6921	99.28	+
Gm10	29665296	29667620	chrLG20_pilon_arrow	23076470	23074135	2325	2336	95.21	-
Gm10	29945387	29947060	chrLG04_pilon_arrow	1387731	1386058	1674	1674	96.12	-
Gm10	30583962	30587792	chrLG19_pilon_arrow	16260692	16256862	3831	3831	99.61	-
Gm10	31130337	31134811	chrLG11_pilon_arrow	21266344	21261883	4475	4462	97.63	-
Gm10	31405812	31415053	chrLG07_pilon_arrow	28765231	28755989	9242	9243	98.44	-
Gm10	31470169	31479391	chrLG19_pilon_arrow	12179968	12189183	9223	9216	99.09	+
Gm10	31479393	31481599	chrLG12_pilon_arrow	17406028	17408233	2207	2206	99.59	+
Gm10	32148842	32151880	chrLG03_pilon_arrow	23403300	23406340	3039	3041	98.29	+
Gm10	32151981	32153794	chrLG03_pilon_arrow	23406757	23408570	1814	1814	97.85	+
Gm10	32919501	32921887	chrLG14_pilon_arrow	28386043	28383656	2387	2388	96.09	-
Gm10	32922902	32925822	chrLG14_pilon_arrow	28383485	28380546	2921	2940	96.8	-
Gm10	33111557	33118325	chrLG06_pilon_arrow	38788281	38795151	6769	6871	98.04	+
Gm10	33120518	33121563	chrLG04_pilon_arrow	2589479	2588434	1046	1046	99.9	-
Gm10	33169878	33173344	chrLG03_pilon_arrow	19259148	19255679	3467	3470	95.39	-
Gm10	35141567	35148616	chrLG15_pilon_arrow	17589406	17582356	7050	7051	99.5	-
Gm10	35381132	35386659	chrLG20_pilon_arrow	21403606	21398075	5528	5532	99.62	-
Gm10	35410911	35416983	chrLG04_pilon_arrow	17027364	17021288	6073	6077	99.01	-
Gm10	35456747	35459680	chrLG19_pilon_arrow	30465574	30462641	2934	2934	99.28	-
Gm10	35558475	35559841	chrLG17_pilon_arrow	14215121	14213754	1367	1368	95.22	-
Gm10	35828029	35833364	chrLG17_pilon_arrow	32713855	32708500	5336	5356	96.17	-
Gm10	35850703	35853243	chrLG01_pilon_arrow	39942029	39939474	2541	2556	95.42	-
Gm10	36408433	36414192	chrLG04_pilon_arrow	30855969	30861733	5760	5765	99.22	+
Gm10	36791389	36797210	chrLG12_pilon_arrow	11861358	11855536	5822	5823	99.61	-
Gm10	37839389	37842428	chrLG06_pilon_arrow	37915661	37912628	3040	3034	99.05	-
Gm10	38269408	38275180	chrLG14_pilon_arrow	43226521	43220716	5773	5806	98.35	-
Gm10	38829475	38832285	chrLG18_pilon_arrow	44491094	44488283	2811	2812	99.72	-
Gm10	40209141	40213544	chrLG14_pilon_arrow	11104858	11100455	4404	4404	99.46	-
Gm10	40358087	40364122	chrLG07_pilon_arrow	42134900	42128864	6036	6037	99.62	-
Gm10	40671583	40676351	chrLG06_pilon_arrow	5090692	5085954	4769	4739	98.26	-
Gm10	41245637	41247025	chrLG01_pilon_arrow	40958213	40956841	1389	1373	95.13	-
Gm10	41307888	41309347	chrLG03_pilon_arrow	8121017	8119553	1460	1465	97.14	-
Gm10	41562872	41564622	chrLG15_pilon_arrow	18734329	18732581	1751	1749	95.74	-
Gm10	41595868	41599448	chrLG01_pilon_arrow	45335696	45339305	3581	3610	98.75	+
Gm10	42439603	42441368	chrLG09_pilon_arrow	46254899	46253108	1766	1792	96.54	-
Gm10	43021021	43024550	chrLG20_pilon_arrow	42216795	42213276	3530	3520	95.79	-
Gm10	43221910	43223832	chrLG05_pilon_arrow	11266191	11264273	1923	1919	95.54	-
Gm10	43994699	43996980	chrLG20_pilon_arrow	41300739	41298451	2282	2289	95.21	-
Gm10	45876960	45878594	chrLG06_pilon_arrow	9516995	9515355	1635	1641	97.68	-
Gm10	45973817	45979099	chrLG02_pilon_arrow	46482631	46477347	5283	5285	97.52	-
Gm10	46253177	46254360	chrLG14_pilon_arrow	3911295	3910112	1184	1184	99.83	-
Gm10	46316870	46322025	chrLG18_pilon_arrow	37460629	37455478	5156	5152	97.79	-
Gm10	46745374	46748817	chrLG09_pilon_arrow	4900414	4896967	3444	3448	95.28	-
Gm10	49301348	49303140	chrLG07_pilon_arrow	24619351	24617559	1793	1793	95.88	-
Gm10	49504408	49505812	chrLG11_pilon_arrow	34433097	34431707	1405	1391	98.86	-
Gm10	49675746	49684936	chrLG12_pilon_arrow	32617708	32626897	9191	9190	98.2	+
Gm10	50059658	50064127	chrLG20_pilon_arrow	724875	720399	4470	4477	99.06	-
Gm10	51261854	51264378	chrLG17_pilon_arrow	13761182	13758665	2525	2518	95.93	-
Gm11	710	5844	chrLG03_pilon_arrow	45032429	45027294	5135	5136	99.09	-
Gm11	4406	7778	chrLG04_pilon_arrow	47147158	47143750	3373	3409	97.33	-
Gm11	138364	139819	chrLG01_pilon_arrow	54662251	54660796	1456	1456	95.48	-
Gm11	180265	181467	chrLG04_pilon_arrow	16413910	16412708	1203	1203	97.18	-
Gm11	611921	614195	chrLG01_pilon_arrow	54148299	54146024	2275	2276	96.27	-
Gm11	1089561	1091167	chrLG01_pilon_arrow	53669988	53668391	1607	1598	95.4	-
Gm11	1735296	1738658	chrLG01_pilon_arrow	53012672	53009297	3363	3376	95.27	-
Gm11	1839321	1847611	chrLG09_pilon_arrow	9496861	9488602	8291	8260	96.15	-
Gm11	2453555	2456082	chrLG01_pilon_arrow	52167179	52164635	2528	2545	95.02	-
Gm11	2550541	2554829	chrLG14_pilon_arrow	15356415	15352111	4289	4305	97.29	-
Gm11	2824538	2830001	chrLG17_pilon_arrow	14633277	14627814	5464	5464	100	-
Gm11	2831062	2833172	chrLG02_pilon_arrow	5263483	5261368	2111	2116	97.74	-
Gm11	4842138	4843979	chrLG09_pilon_arrow	20629494	20627648	1842	1847	99.08	-
Gm11	4886427	4890403	chrLG10_pilon_arrow	13667737	13671707	3977	3971	98.84	+
Gm11	5567235	5568757	chrLG01_pilon_arrow	48794706	48793190	1523	1517	96.72	-
Gm11	5933298	5935479	chrLG08_pilon_arrow	17983196	17981021	2182	2176	97.71	-
Gm11	5937783	5941493	chrLG13_pilon_arrow	46061802	46058110	3711	3693	96.6	-
Gm11	6535427	6538316	chrLG01_pilon_arrow	47714187	47711303	2890	2885	95.82	-
Gm11	7380403	7385396	chrLG14_pilon_arrow	24881680	24876692	4994	4989	99.54	-
Gm11	7625785	7627273	chrLG10_pilon_arrow	22137747	22136269	1489	1479	95.26	-
Gm11	9119570	9123464	chrLG17_pilon_arrow	8379500	8375608	3895	3893	99.56	-
Gm11	9841749	9843736	chrLG10_pilon_arrow	8663759	8661772	1988	1988	99.5	-
Gm11	10432042	10434322	chrLG20_pilon_arrow	6873638	6871357	2281	2282	99.69	-
Gm11	10987276	10992471	chrLG04_pilon_arrow	37646699	37641506	5196	5194	95.88	-
Gm11	11334486	11338943	chrLG08_pilon_arrow	10611139	10615584	4458	4446	98.7	+
Gm11	11576300	11581387	chrLG02_pilon_arrow	17862164	17867273	5088	5110	98.44	+
Gm11	12168805	12174078	chrLG16_pilon_arrow	27871091	27865817	5274	5275	99.72	-
Gm11	12921355	12924365	chrLG12_pilon_arrow	26446894	26449884	3011	2991	98.04	+
Gm11	12988115	12992744	chrLG06_pilon_arrow	31531706	31527061	4630	4646	97.38	-
Gm11	13229501	13231202	chrLG04_pilon_arrow	25393344	25391644	1702	1701	98.12	-
Gm11	13277481	13281721	chrLG19_pilon_arrow	25106671	25102400	4241	4272	97.97	-
Gm11	13341630	13345304	chrLG12_pilon_arrow	26265106	26261432	3675	3675	98.86	-
Gm11	13346107	13351939	chrLG12_pilon_arrow	26261432	26255582	5833	5851	99.5	-
Gm11	13374479	13388172	chrLG12_pilon_arrow	26462887	26449182	13694	13706	99.56	-
Gm11	13570035	13573860	chrLG09_pilon_arrow	17244636	17240811	3826	3826	99.79	-
Gm11	13692479	13697883	chrLG14_pilon_arrow	10911874	10917275	5405	5402	99.46	+
Gm11	13843697	13847122	chrLG02_pilon_arrow	30107936	30104513	3426	3424	97.43	-
Gm11	13863585	13864888	chrLG05_pilon_arrow	21741450	21742748	1304	1299	97.02	+
Gm11	14001101	14002807	chrLG13_pilon_arrow	1534481	1532775	1707	1707	99.77	-
Gm11	14762131	14765834	chrLG03_pilon_arrow	4527339	4531038	3704	3700	99.43	+
Gm11	14830471	14836302	chrLG13_pilon_arrow	468994	463177	5832	5818	97.7	-
Gm11	15042116	15044213	chrLG14_pilon_arrow	41130593	41128484	2098	2110	96.22	-
Gm11	15386692	15388453	chrLG18_pilon_arrow	23067441	23065679	1762	1763	96.16	-
Gm11	15479321	15491241	chrLG18_pilon_arrow	22964837	22976736	11921	11900	97.88	+
Gm11	15853324	15854713	chrLG10_pilon_arrow	29716445	29715059	1390	1387	97.84	-
Gm11	15854853	15860826	chrLG10_pilon_arrow	29715026	29709057	5974	5970	97.58	-
Gm11	16397186	16398240	chrLG04_pilon_arrow	33418979	33420033	1055	1055	99.91	+
Gm11	16810331	16817753	chrLG19_pilon_arrow	33104002	33096541	7423	7462	96.84	-
Gm11	17202811	17207669	chrLG18_pilon_arrow	48247333	48242539	4859	4795	96.43	-
Gm11	17208017	17212055	chrLG18_pilon_arrow	48241795	48237777	4039	4019	98.12	-
Gm11	17727898	17742944	chrLG20_pilon_arrow	12345384	12330332	15047	15053	99.24	-
Gm11	18312564	18317368	chrLG09_pilon_arrow	31026923	31022104	4805	4820	96.57	-
Gm11	18399349	18409676	chrLG12_pilon_arrow	17382310	17392643	10328	10334	98.72	+
Gm11	19471459	19476260	chrLG04_pilon_arrow	26445913	26450714	4802	4802	99.75	+
Gm11	20176188	20178619	chrLG20_pilon_arrow	10655813	10653377	2432	2437	97.09	-
Gm11	20236920	20238973	chrLG07_pilon_arrow	25789888	25791945	2054	2058	98.54	+
Gm11	20239355	20242023	chrLG07_pilon_arrow	25792188	25794855	2669	2668	99.96	+
Gm11	20559183	20561866	chrLG20_pilon_arrow	12332537	12335223	2684	2687	99.74	+
Gm11	20848991	20855360	chrLG14_pilon_arrow	9938507	9932130	6370	6378	99.11	-
Gm11	20855382	20857805	chrLG14_pilon_arrow	9931865	9929444	2424	2422	99.22	-
Gm11	20859094	20860807	chrLG10_pilon_arrow	20054614	20056321	1714	1708	97.15	+
Gm11	20945578	20952805	chrLG20_pilon_arrow	16066695	16059418	7228	7278	97.14	-
Gm11	20967559	20971916	chrLG05_pilon_arrow	20675176	20670703	4358	4474	95	-
Gm11	21567432	21570479	chrLG15_pilon_arrow	30639740	30636693	3048	3048	99.51	-
Gm11	21634315	21639679	chrLG12_pilon_arrow	26013291	26018665	5365	5375	98.66	+
Gm11	21700304	21712237	chrLG17_pilon_arrow	22763785	22751885	11934	11901	97.22	-
Gm11	21721545	21738941	chrLG14_pilon_arrow	30811933	30829391	17397	17459	99.24	+
Gm11	21799292	21803032	chrLG04_pilon_arrow	30544330	30548079	3741	3750	97.47	+
Gm11	22239789	22243253	chrLG10_pilon_arrow	18800602	18797138	3465	3465	98.01	-
Gm11	22297297	22300401	chrLG14_pilon_arrow	38627768	38624658	3105	3111	97.56	-
Gm11	22454430	22462349	chrLG05_pilon_arrow	15288735	15296643	7920	7909	98.41	+
Gm11	23334860	23337950	chrLG02_pilon_arrow	32093890	32096980	3091	3091	99.71	+
Gm11	23814729	23819311	chrLG16_pilon_arrow	15606055	15601467	4583	4589	99.32	-
Gm11	25499095	25503713	chrLG01_pilon_arrow	16045902	16041284	4619	4619	99.85	-
Gm11	25849015	25857499	chrLG06_pilon_arrow	26420598	26429077	8485	8480	98.53	+
Gm11	25879567	25880622	chrLG03_pilon_arrow	17799575	17800630	1056	1056	99.81	+
Gm11	26067382	26070435	chrLG07_pilon_arrow	5644429	5641391	3054	3039	98.37	-
Gm11	26298985	26300774	chrLG19_pilon_arrow	3247502	3245713	1790	1790	98.38	-
Gm11	26517014	26522286	chrLG16_pilon_arrow	27871090	27865817	5273	5274	99.66	-
Gm11	27055270	27059046	chrLG18_pilon_arrow	9557683	9553918	3777	3766	97.94	-
Gm11	27316773	27321536	chrLG19_pilon_arrow	23804354	23799603	4764	4752	98.1	-
Gm11	28470631	28472768	chrLG18_pilon_arrow	36273518	36271380	2138	2139	99.81	-
Gm11	28491871	28493235	chrLG15_pilon_arrow	20029374	20028013	1365	1362	96.85	-
Gm11	28493372	28495069	chrLG15_pilon_arrow	20024318	20022618	1698	1701	97.3	-
Gm11	28498967	28501112	chrLG13_pilon_arrow	20371621	20373761	2146	2141	95.39	+
Gm11	28741361	28742963	chrLG12_pilon_arrow	11697258	11698860	1603	1603	99.88	+
Gm11	28904952	28907249	chrLG20_pilon_arrow	3296065	3293769	2298	2297	96.52	-
Gm11	29006962	29010753	chrLG12_pilon_arrow	33912910	33909121	3792	3790	98.68	-
Gm11	29401350	29402826	chrLG13_pilon_arrow	24393375	24391889	1477	1487	95.44	-
Gm11	29403622	29405890	chrLG20_pilon_arrow	14194786	14192522	2269	2265	98.37	-
Gm11	29446707	29447960	chrLG14_pilon_arrow	32316570	32317819	1254	1250	97.85	+
Gm11	29486106	29487721	chrLG13_pilon_arrow	10891835	10893447	1616	1613	99.63	+
Gm11	29622718	29626251	chrLG10_pilon_arrow	25755390	25758924	3534	3535	99.21	+
Gm11	29647031	29650304	chrLG20_pilon_arrow	44078111	44074812	3274	3300	95.46	-
Gm11	29970684	29977070	chrLG13_pilon_arrow	27095499	27101883	6387	6385	99.81	+	artificial translocation predicted by genetic map
Gm11	29977171	29978271	chrLG13_pilon_arrow	27102024	27103131	1101	1108	99.28	+	artificial translocation predicted by genetic map
Gm11	29978741	29985120	chrLG13_pilon_arrow	27103498	27109843	6380	6346	99.09	+	artificial translocation predicted by genetic map
Gm11	29985224	30006185	chrLG13_pilon_arrow	27110021	27130976	20962	20956	99.89	+	artificial translocation predicted by genetic map
Gm11	30006469	30035685	chrLG13_pilon_arrow	27131764	27161004	29217	29241	99.11	+	artificial translocation predicted by genetic map
Gm11	30045686	30071437	chrLG13_pilon_arrow	27167149	27192929	25752	25781	99.03	+	artificial translocation predicted by genetic map
Gm11	30084360	30117224	chrLG13_pilon_arrow	27565127	27598016	32865	32890	99.53	+	artificial translocation predicted by genetic map
Gm11	30127268	30129311	chrLG13_pilon_arrow	27561391	27559315	2044	2077	97.5	-	artificial translocation predicted by genetic map
Gm11	30249985	30253678	chrLG16_pilon_arrow	872172	868488	3694	3685	99.43	-
Gm11	30253784	30260686	chrLG13_pilon_arrow	27426244	27419327	6903	6918	98.62	-	artificial translocation predicted by genetic map
Gm11	30298422	30369756	chrLG13_pilon_arrow	27382772	27311344	71335	71429	99.27	-	artificial translocation predicted by genetic map
Gm11	30431919	30432996	chrLG13_pilon_arrow	27249352	27248272	1078	1081	98.98	-	artificial translocation predicted by genetic map
Gm11	30433245	30463765	chrLG13_pilon_arrow	27248035	27217520	30521	30516	99.49	-	artificial translocation predicted by genetic map
Gm11	30464093	30485615	chrLG13_pilon_arrow	27216672	27195118	21523	21555	99.61	-	artificial translocation predicted by genetic map
Gm11	31215941	31217386	chrLG18_pilon_arrow	52633745	52632297	1446	1449	96.63	-
Gm11	31217701	31219832	chrLG18_pilon_arrow	52636812	52634680	2132	2133	96.6	-
Gm11	31226653	31227787	chrLG16_pilon_arrow	24317872	24316741	1135	1132	97.1	-
Gm11	31300783	31302856	chrLG17_pilon_arrow	14776752	14774685	2074	2068	96	-
Gm11	32385956	32387472	chrLG18_pilon_arrow	2220667	2219145	1517	1523	95.67	-
Gm11	32621438	32623777	chrLG18_pilon_arrow	2015216	2012877	2340	2340	95.05	-
Gm11	32676780	32681891	chrLG18_pilon_arrow	1970228	1965115	5112	5114	95.68	-
Gm11	33243177	33249212	chrLG18_pilon_arrow	1469470	1463435	6036	6036	97.55	-
Gm11	34201865	34203112	chrLG01_pilon_arrow	39720239	39721477	1248	1239	95.45	+
Gm11	34330183	34331916	chrLG01_pilon_arrow	26709678	26707945	1734	1734	97.01	-
Gm11	34653129	34655539	chrLG18_pilon_arrow	33914	31528	2411	2387	95.04	-
Gm11	34668745	34670730	chrLG18_pilon_arrow	11982	9986	1986	1997	95.2	-
Gm11	34743210	34750187	chrLG08_pilon_arrow	43617228	43624221	6978	6994	99.01	+
Gm11	34750401	34751562	chrLG08_pilon_arrow	43624763	43625923	1162	1161	98.97	+
Gm11	34751663	34753871	chrLG08_pilon_arrow	43625993	43628201	2209	2209	100	+
Gm11	34754729	34755807	chrLG08_pilon_arrow	43630131	43631209	1079	1079	99.91	+
Gm11	34756971	34760902	chrLG08_pilon_arrow	43632298	43636228	3932	3931	99.97	+
Gm11	34761921	34766867	chrLG08_pilon_arrow	43637062	43642009	4947	4948	99.9	+
Gm12	20693	24836	chrLG02_pilon_arrow	7851	3661	4144	4191	95.93	-
Gm12	35182	39417	chrLG08_pilon_arrow	6219	1990	4236	4230	96.47	-
Gm12	357752	360671	chrLG06_pilon_arrow	45119056	45116129	2920	2928	95.59	-
Gm12	5643392	5645549	chrLG11_pilon_arrow	11094680	11092523	2158	2158	95.11	-
Gm12	5678180	5679480	chrLG01_pilon_arrow	28243187	28244483	1301	1297	95.78	+
Gm12	6064888	6066491	chrLG05_pilon_arrow	22516967	22515371	1604	1597	95.64	-
Gm12	6480123	6484237	chrLG18_pilon_arrow	4805803	4801688	4115	4116	95.53	-
Gm12	9495301	9498499	chrLG16_pilon_arrow	23936881	23933683	3199	3199	99.28	-
Gm12	9499104	9502977	chrLG16_pilon_arrow	8699677	8695833	3874	3845	98.04	-
Gm12	9676357	9679848	chrLG13_pilon_arrow	26924864	26928310	3492	3447	98.48	+
Gm12	9683024	9684737	chrLG20_pilon_arrow	393359	391627	1714	1733	98.27	-
Gm12	9948033	9951109	chrLG06_pilon_arrow	38123196	38120121	3077	3076	96.27	-
Gm12	11030888	11037414	chrLG09_pilon_arrow	11173337	11166807	6527	6531	97.11	-
Gm12	11204104	11216236	chrLG11_pilon_arrow	16916122	16904017	12133	12106	98.04	-
Gm12	11503504	11507047	chrLG07_pilon_arrow	17925525	17921982	3544	3544	98.14	-
Gm12	11508311	11520900	chrLG18_pilon_arrow	44256202	44243613	12590	12590	99.15	-
Gm12	11523314	11531338	chrLG03_pilon_arrow	17801233	17809262	8025	8030	99.3	+
Gm12	11929420	11932883	chrLG06_pilon_arrow	24780081	24783561	3464	3481	98.85	+
Gm12	11995969	12001503	chrLG18_pilon_arrow	33939250	33944785	5535	5536	98.39	+
Gm12	12404181	12405513	chrLG15_pilon_arrow	10451075	10449739	1333	1337	96.64	-
Gm12	12867092	12868466	chrLG19_pilon_arrow	41027690	41026314	1375	1377	97.83	-
Gm12	13507188	13511232	chrLG09_pilon_arrow	28498923	28494907	4045	4017	97.45	-
Gm12	13702929	13707450	chrLG05_pilon_arrow	7557606	7553023	4522	4584	96.36	-
Gm12	13772775	13775662	chrLG17_pilon_arrow	21310526	21307656	2888	2871	97.72	-
Gm12	13784745	13786180	chrLG02_pilon_arrow	8312149	8310715	1436	1435	98.33	-
Gm12	13886952	13891655	chrLG10_pilon_arrow	30905880	30901171	4704	4710	98.26	-
Gm12	14432806	14436781	chrLG19_pilon_arrow	21062502	21066477	3976	3976	99.8	+
Gm12	15793941	15797329	chrLG06_pilon_arrow	7785961	7782552	3389	3410	97.33	-
Gm12	16294468	16296358	chrLG11_pilon_arrow	14508481	14510375	1891	1895	95.26	+
Gm12	16810330	16812948	chrLG16_pilon_arrow	6272317	6274938	2619	2622	98.89	+
Gm12	16823327	16828705	chrLG14_pilon_arrow	31411003	31416382	5379	5380	99.22	+
Gm12	17297347	17298967	chrLG05_pilon_arrow	34652677	34651063	1621	1615	95.2	-
Gm12	17485586	17487445	chrLG09_pilon_arrow	22899431	22897573	1860	1859	99.78	-
Gm12	18106229	18108200	chrLG15_pilon_arrow	15105387	15103420	1972	1968	95.65	-
Gm12	18294195	18303640	chrLG03_pilon_arrow	17307344	17297852	9446	9493	97.62	-
Gm12	18350218	18353697	chrLG01_pilon_arrow	38746823	38743343	3480	3481	98.31	-
Gm12	18485680	18487987	chrLG07_pilon_arrow	11484200	11481921	2308	2280	97.01	-
Gm12	18921868	18927237	chrLG01_pilon_arrow	11524573	11519172	5370	5402	96.97	-
Gm12	19538108	19541335	chrLG20_pilon_arrow	20274042	20270813	3228	3230	99.5	-
Gm12	19591277	19592972	chrLG06_pilon_arrow	41558615	41556921	1696	1695	96.11	-
Gm12	20178808	20180921	chrLG07_pilon_arrow	15253373	15251259	2114	2115	96.02	-
Gm12	20185218	20187344	chrLG14_pilon_arrow	7168290	7166161	2127	2130	97.94	-
Gm12	21143232	21146402	chrLG08_pilon_arrow	35452481	35449309	3171	3173	98.14	-
Gm12	21671580	21674428	chrLG15_pilon_arrow	16852816	16849949	2849	2868	96.32	-
Gm12	22008036	22010189	chrLG16_pilon_arrow	21012876	21015019	2154	2144	98.33	+
Gm12	22011742	22013264	chrLG16_pilon_arrow	21016584	21018103	1523	1520	98.23	+
Gm12	22158674	22162550	chrLG15_pilon_arrow	16124949	16128809	3877	3861	99.56	+
Gm12	22752411	22760266	chrLG15_pilon_arrow	21810846	21802985	7856	7862	98.91	-
Gm12	22865682	22870577	chrLG06_pilon_arrow	31705604	31710517	4896	4914	99.04	+
Gm12	23166105	23171270	chrLG16_pilon_arrow	19650347	19655522	5166	5176	97.13	+
Gm12	23537597	23540728	chrLG17_pilon_arrow	20884288	20881156	3132	3133	97.07	-
Gm12	23784116	23791337	chrLG03_pilon_arrow	10919120	10926340	7222	7221	98.58	+
Gm12	24159004	24164719	chrLG06_pilon_arrow	24686559	24692259	5716	5701	96.17	+
Gm12	24212933	24220287	chrLG14_pilon_arrow	15140196	15132844	7355	7353	98.82	-
Gm12	24425907	24428218	chrLG09_pilon_arrow	14737885	14740204	2312	2320	98.41	+
Gm12	24428954	24441024	chrLG14_pilon_arrow	25550091	25538038	12071	12054	99.08	-
Gm12	24660788	24666316	chrLG11_pilon_arrow	25200974	25206489	5529	5516	98.68	+
Gm12	24920829	24926597	chrLG04_pilon_arrow	24647010	24641231	5769	5780	98.93	-
Gm12	25048836	25059492	chrLG11_pilon_arrow	22719760	22709082	10657	10679	98.57	-
Gm12	25419515	25423948	chrLG13_pilon_arrow	8546915	8542472	4434	4444	97.82	-
Gm12	25765766	25772985	chrLG10_pilon_arrow	25272813	25280036	7220	7224	98.81	+
Gm12	25834371	25842523	chrLG18_pilon_arrow	12571697	12563538	8153	8160	98.18	-
Gm12	25896010	25905361	chrLG04_pilon_arrow	30942990	30952319	9352	9330	98.14	+
Gm12	26127324	26135666	chrLG15_pilon_arrow	21810846	21802505	8343	8342	98.85	-
Gm12	26205465	26214445	chrLG18_pilon_arrow	15585183	15576149	8981	9035	96.7	-
Gm12	26223980	26226925	chrLG08_pilon_arrow	31571942	31574887	2946	2946	99.05	+
Gm12	26234287	26239807	chrLG04_pilon_arrow	32269311	32274829	5521	5519	98.88	+
Gm12	26288773	26299254	chrLG04_pilon_arrow	22440792	22430308	10482	10485	99.74	-
Gm12	26457002	26462697	chrLG07_pilon_arrow	20819738	20825488	5696	5751	95.3	+
Gm12	26674334	26679551	chrLG04_pilon_arrow	22438108	22432891	5218	5218	99.66	-
Gm12	27197534	27206735	chrLG02_pilon_arrow	29159969	29169142	9202	9174	97.87	+
Gm12	27250708	27253966	chrLG07_pilon_arrow	23471475	23468218	3259	3258	95.28	-
Gm12	27581928	27587747	chrLG18_pilon_arrow	25484539	25490380	5820	5842	97.59	+
Gm12	27633090	27640714	chrLG14_pilon_arrow	38604127	38611803	7625	7677	98.44	+
Gm12	27644883	27646178	chrLG15_pilon_arrow	27234821	27236117	1296	1297	98.69	+
Gm12	27993247	27998428	chrLG01_pilon_arrow	9153942	9148760	5182	5183	98.26	-
Gm12	28093555	28096760	chrLG19_pilon_arrow	19719917	19723071	3206	3155	95.43	+
Gm12	28179394	28190697	chrLG18_pilon_arrow	25496133	25484813	11304	11321	98.09	-
Gm12	28215992	28218399	chrLG05_pilon_arrow	17488775	17491188	2408	2414	96.9	+
Gm12	28231318	28241991	chrLG05_pilon_arrow	24309899	24299210	10674	10690	98.25	-
Gm12	28375432	28380200	chrLG02_pilon_arrow	5360809	5356017	4769	4793	98	-
Gm12	28390314	28393398	chrLG10_pilon_arrow	14033372	14036457	3085	3086	98.93	+
Gm12	28393499	28395406	chrLG10_pilon_arrow	14037811	14039718	1908	1908	99.37	+
Gm12	28396900	28404669	chrLG10_pilon_arrow	14040792	14033024	7770	7769	99.09	-
Gm12	28984172	28986354	chrLG14_pilon_arrow	31393553	31391370	2183	2184	99.77	-
Gm12	29417755	29427963	chrLG19_pilon_arrow	20348154	20337921	10209	10234	97.2	-
Gm12	29435234	29440051	chrLG15_pilon_arrow	23485929	23481099	4818	4831	96.24	-
Gm12	29450383	29459606	chrLG06_pilon_arrow	38688885	38679689	9224	9197	97.51	-
Gm12	29973752	29979568	chrLG09_pilon_arrow	17946495	17940652	5817	5844	96.49	-
Gm12	30030168	30033901	chrLG06_pilon_arrow	32251264	32254997	3734	3734	99.33	+
Gm12	30041472	30043809	chrLG06_pilon_arrow	32259792	32262127	2338	2336	99.83	+
Gm12	30043829	30045980	chrLG06_pilon_arrow	32263036	32265182	2152	2147	99.4	+
Gm12	30318308	30321563	chrLG01_pilon_arrow	21351210	21347959	3256	3252	96.87	-
Gm12	31621182	31629702	chrLG14_pilon_arrow	17097716	17106282	8521	8567	95.86	+
Gm12	32456932	32459405	chrLG07_pilon_arrow	8604810	8602357	2474	2454	99.11	-
Gm12	32561298	32564605	chrLG07_pilon_arrow	14883347	14880017	3308	3331	95.71	-
Gm12	32863088	32864662	chrLG20_pilon_arrow	33270836	33269268	1575	1569	96.2	-
Gm12	33415042	33417966	chrLG15_pilon_arrow	13096274	13093361	2925	2914	99.32	-
Gm12	34287654	34289905	chrLG10_pilon_arrow	10573108	10575358	2252	2251	97.47	+
Gm12	34928592	34930952	chrLG20_pilon_arrow	7911273	7908919	2361	2355	97.88	-
Gm12	35140104	35146693	chrLG18_pilon_arrow	51694359	51687823	6590	6537	97.32	-
Gm12	35311551	35314408	chrLG01_pilon_arrow	16305476	16308320	2858	2845	97.06	+
Gm12	35723281	35726146	chrLG11_pilon_arrow	32696550	32693682	2866	2869	98.61	-
Gm12	36212386	36214289	chrLG13_pilon_arrow	40564214	40562309	1904	1906	95.65	-
Gm12	36260180	36263524	chrLG05_pilon_arrow	2957114	2953775	3345	3340	99.85	-	artificial translocation predicted by genetic map
Gm12	36561580	36563303	chrLG01_pilon_arrow	42731529	42729794	1724	1736	95.17	-
Gm12	37069162	37074046	chrLG09_pilon_arrow	104153	99269	4885	4885	98.36	-
Gm12	37374759	37377240	chrLG13_pilon_arrow	39552755	39550272	2482	2484	96.34	-
Gm12	37601937	37605617	chrLG20_pilon_arrow	32508350	32504662	3681	3689	98.89	-
Gm12	37784387	37791913	chrLG04_pilon_arrow	43999407	43991894	7527	7514	98.18	-
Gm12	40080547	40082629	chrLG14_pilon_arrow	27997	25901	2083	2097	97.62	-
Gm12	40083888	40089291	chrLG04_pilon_arrow	47121342	47115909	5404	5434	98.36	-
Gm13	239634	245028	chrLG19_pilon_arrow	46934380	46939774	5395	5395	99.52	+
Gm13	296594	299401	chrLG01_pilon_arrow	51599578	51596786	2808	2793	96.88	-
Gm13	1486598	1492464	chrLG19_pilon_arrow	31117525	31111664	5867	5862	99.34	-
Gm13	1823961	1835198	chrLG15_pilon_arrow	5069063	5057816	11238	11248	97.1	-
Gm13	2160207	2162997	chrLG18_pilon_arrow	16264969	16262182	2791	2788	97.21	-
Gm13	2294815	2310010	chrLG18_pilon_arrow	28102604	28117865	15196	15262	98.13	+
Gm13	2737753	2739095	chrLG20_pilon_arrow	19052728	19054077	1343	1350	95.7	+
Gm13	2796552	2805027	chrLG09_pilon_arrow	25726613	25718137	8476	8477	99.41	-
Gm13	2860276	2871789	chrLG09_pilon_arrow	9839598	9828048	11514	11551	98.05	-
Gm13	4130477	4135245	chrLG10_pilon_arrow	30035734	30040543	4769	4810	95.46	+
Gm13	4248514	4251255	chrLG20_pilon_arrow	32994692	32991873	2742	2820	95.19	-
Gm13	4453849	4456514	chrLG20_pilon_arrow	12342626	12345312	2666	2687	97.81	+
Gm13	4578597	4581986	chrLG06_pilon_arrow	35380053	35383454	3390	3402	96.83	+
Gm13	4629277	4630574	chrLG01_pilon_arrow	14721482	14722774	1298	1293	97.62	+
Gm13	5104783	5107370	chrLG16_pilon_arrow	20442814	20440231	2588	2584	98.42	-
Gm13	6173502	6175166	chrLG20_pilon_arrow	12706934	12705273	1665	1662	95.26	-
Gm13	6259706	6261020	chrLG03_pilon_arrow	16623435	16624763	1315	1329	98.72	+
Gm13	6841992	6846704	chrLG18_pilon_arrow	48310110	48305396	4713	4715	95.61	-
Gm13	6895433	6903889	chrLG10_pilon_arrow	8171365	8162894	8457	8472	99.2	-
Gm13	8411741	8413053	chrLG20_pilon_arrow	37542155	37540848	1313	1308	96.2	-
Gm13	8430590	8436928	chrLG10_pilon_arrow	16085133	16091489	6339	6357	98.07	+
Gm13	8858979	8860203	chrLG01_pilon_arrow	50388058	50386839	1225	1220	96	-
Gm13	9110227	9115284	chrLG15_pilon_arrow	26823899	26818837	5058	5063	98.52	-
Gm13	10577136	10580136	chrLG18_pilon_arrow	26777268	26780295	3001	3028	95.73	+
Gm13	10969431	10972639	chrLG20_pilon_arrow	11378012	11374807	3209	3206	98.54	-
Gm13	11777857	11780727	chrLG18_pilon_arrow	43445805	43442939	2871	2867	99.27	-
Gm13	11783300	11785562	chrLG18_pilon_arrow	43440907	43438644	2263	2264	99.12	-
Gm13	12272648	12274651	chrLG18_pilon_arrow	19856677	19854673	2004	2005	97.01	-
Gm13	12275035	12277345	chrLG17_pilon_arrow	4546884	4544582	2311	2303	96.07	-
Gm13	12285466	12287100	chrLG18_pilon_arrow	19854636	19853000	1635	1637	96.59	-
Gm13	12966692	12978454	chrLG20_pilon_arrow	12329076	12340845	11763	11770	99.19	+
Gm13	13108695	13116945	chrLG20_pilon_arrow	12337795	12329544	8251	8252	99.31	-
Gm13	13374462	13376569	chrLG19_pilon_arrow	40053709	40051600	2108	2110	95.25	-
Gm13	13675328	13681197	chrLG20_pilon_arrow	36856828	36862692	5870	5865	99.74	+
Gm13	13934169	13938033	chrLG12_pilon_arrow	6505026	6501142	3865	3885	97.12	-
Gm13	13996532	14008369	chrLG01_pilon_arrow	52461663	52449785	11838	11879	97.57	-
Gm13	14371542	14376576	chrLG06_pilon_arrow	18320758	18315755	5035	5004	97.54	-
Gm13	14379519	14380760	chrLG20_pilon_arrow	21654943	21653701	1242	1243	98.15	-
Gm13	15063684	15067339	chrLG02_pilon_arrow	37019460	37015785	3656	3676	97.34	-
Gm13	15067603	15069672	chrLG02_pilon_arrow	37015787	37013728	2070	2060	97.2	-
Gm13	15604125	15606036	chrLG19_pilon_arrow	3437320	3435429	1912	1892	95.04	-
Gm13	15823302	15828405	chrLG19_pilon_arrow	33040414	33045512	5104	5099	98.77	+
Gm13	16932479	16935146	chrLG15_pilon_arrow	11542318	11539651	2668	2668	98.73	-
Gm13	16972716	16974125	chrLG05_pilon_arrow	32049968	32048559	1410	1410	99.57	-
Gm13	17129510	17133285	chrLG16_pilon_arrow	32528661	32532436	3776	3776	98.78	+
Gm13	17143037	17144507	chrLG16_pilon_arrow	32532430	32533901	1471	1472	98.85	+	artificial translocation predicted by genetic map
Gm13	17144745	17146611	chrLG01_pilon_arrow	38745508	38743637	1867	1872	98.4	-
Gm13	17264945	17268586	chrLG09_pilon_arrow	40384205	40387817	3642	3613	97.94	+	artificial translocation predicted by genetic map
Gm13	17269307	17272667	chrLG09_pilon_arrow	40388781	40392178	3361	3398	95.81	+	artificial translocation predicted by genetic map
Gm13	17274542	17275863	chrLG09_pilon_arrow	40394153	40395468	1322	1316	97.22	+	artificial translocation predicted by genetic map
Gm13	17285419	17294053	chrLG09_pilon_arrow	40398925	40407583	8635	8659	98.49	+	artificial translocation predicted by genetic map
Gm13	17294185	17298480	chrLG09_pilon_arrow	40407583	40411933	4296	4351	96.35	+	artificial translocation predicted by genetic map
Gm13	17349962	17354685	chrLG09_pilon_arrow	30647340	30642620	4724	4721	98.07	-
Gm13	17733230	17739821	chrLG16_pilon_arrow	25281906	25275313	6592	6594	98.56	-
Gm13	17902249	17903813	chrLG04_pilon_arrow	28076842	28075269	1565	1574	97.97	-
Gm13	18330344	18331803	chrLG02_pilon_arrow	27017190	27015722	1460	1469	95.38	-
Gm13	18792563	18793701	chrLG07_pilon_arrow	32034383	32033245	1139	1139	99.91	-
Gm13	19214457	19216865	chrLG14_pilon_arrow	18273678	18271274	2409	2405	95.02	-
Gm13	19351243	19356022	chrLG14_pilon_arrow	24343778	24339011	4780	4768	95.22	-
Gm13	19386743	19390044	chrLG11_pilon_arrow	21200752	21197456	3302	3297	98.67	-
Gm13	20390450	20395226	chrLG14_pilon_arrow	4552518	4547711	4777	4808	98.73	-
Gm13	21293229	21297525	chrLG12_pilon_arrow	5803282	5799002	4297	4281	98.98	-
Gm13	26592404	26594483	chrLG04_pilon_arrow	35277168	35275089	2080	2080	97.94	-
Gm13	26671968	26679260	chrLG11_pilon_arrow	33799038	33791767	7293	7272	99.63	-	artificial translocation predicted by genetic map
Gm13	26679423	26709609	chrLG11_pilon_arrow	33791730	33761557	30187	30174	99.94	-	artificial translocation predicted by genetic map
Gm13	26711539	26715280	chrLG11_pilon_arrow	33759845	33756111	3742	3735	98.91	-	artificial translocation predicted by genetic map
Gm13	26715992	26810773	chrLG11_pilon_arrow	33755387	33660623	94782	94765	99.76	-	artificial translocation predicted by genetic map
Gm13	27420321	27422797	chrLG20_pilon_arrow	26131357	26128850	2477	2508	96.47	-
Gm13	27593247	27596199	chrLG17_pilon_arrow	8738815	8735863	2953	2953	95.51	-	135946
Gm13	27627724	27631085	chrLG04_pilon_arrow	43810867	43807503	3362	3365	98.99	-
Gm13	29887486	29891129	chrLG01_pilon_arrow	45339305	45335696	3644	3610	98.24	-
Gm13	30088710	30091734	chrLG08_pilon_arrow	39969972	39966949	3025	3024	99.47	-
Gm13	30343458	30345925	chrLG10_pilon_arrow	44381614	44379143	2468	2472	97.86	-
Gm13	30375447	30381714	chrLG14_pilon_arrow	3421782	3428034	6268	6253	98.87	+
Gm13	30565128	30573244	chrLG04_pilon_arrow	41061758	41053647	8117	8112	97.3	-
Gm13	31490052	31494519	chrLG15_pilon_arrow	25669664	25665212	4468	4453	99.51	-
Gm13	31933618	31936993	chrLG08_pilon_arrow	10614510	10611135	3376	3376	99.64	-
Gm13	32717902	32719230	chrLG15_pilon_arrow	11598477	11597155	1329	1323	95.41	-
Gm13	33189851	33191606	chrLG15_pilon_arrow	41927878	41926121	1756	1758	98.41	-
Gm13	33430602	33433126	chrLG10_pilon_arrow	25635365	25637858	2525	2494	96.09	+
Gm13	33713075	33714345	chrLG05_pilon_arrow	33460955	33459685	1271	1271	98.98	-
Gm13	33927562	33930055	chrLG11_pilon_arrow	25579085	25581578	2494	2494	99.36	+
Gm13	34139249	34143007	chrLG15_pilon_arrow	6391840	6388061	3759	3780	95.46	-
Gm13	35162989	35164759	chrLG15_pilon_arrow	5519710	5517937	1771	1774	95.17	-
Gm13	36305568	36306924	chrLG02_pilon_arrow	7388918	7387559	1357	1360	98.46	-
Gm13	37738628	37739716	chrLG03_pilon_arrow	31689303	31688215	1089	1089	98.26	-
Gm13	38762724	38765207	chrLG12_pilon_arrow	35608344	35605863	2484	2482	96.34	-
Gm13	38859293	38864865	chrLG06_pilon_arrow	36215195	36209626	5573	5570	99.41	-
Gm13	39853141	39855046	chrLG12_pilon_arrow	34427461	34425558	1906	1904	95.65	-
Gm13	41082078	41087484	chrLG19_pilon_arrow	37630161	37624755	5407	5407	95.79	-
Gm13	41831617	41836454	chrLG07_pilon_arrow	5693935	5689097	4838	4839	97.63	-
Gm13	42616109	42617659	chrLG16_pilon_arrow	6315573	6317113	1551	1541	98.71	+	artificial translocation predicted by genetic map
Gm13	43168876	43172127	chrLG15_pilon_arrow	2802911	2799680	3252	3232	95.24	-
Gm13	43391079	43393689	chrLG15_pilon_arrow	2590893	2588286	2611	2608	95.41	-
Gm13	43541184	43544451	chrLG15_pilon_arrow	2431077	2427802	3268	3276	95.18	-
Gm13	43571393	43573456	chrLG04_pilon_arrow	820008	817951	2064	2058	96.71	-
Gm13	43893477	43894650	chrLG15_pilon_arrow	2034570	2033394	1174	1177	98.39	-
Gm13	44293531	44294957	chrLG20_pilon_arrow	47073348	47071922	1427	1427	99.79	-
Gm13	44397883	44399210	chrLG15_pilon_arrow	1436362	1435039	1328	1324	95.48	-
Gm13	44575018	44577922	chrLG05_pilon_arrow	4619930	4622835	2905	2906	99.55	+
Gm13	45088099	45090522	chrLG15_pilon_arrow	726392	723981	2424	2412	95.71	-
Gm13	45339784	45343476	chrLG11_pilon_arrow	5931328	5927617	3693	3712	96.57	-
Gm13	45367835	45368922	chrLG14_pilon_arrow	23556301	23555210	1088	1092	98.44	-
Gm13	45373329	45374695	chrLG02_pilon_arrow	7003706	7002338	1367	1369	97.37	-
Gm13	45437376	45438924	chrLG15_pilon_arrow	433876	432319	1549	1558	95.14	-
Gm13	45749619	45752041	chrLG15_pilon_arrow	145590	143175	2423	2416	95.03	-
Gm13	45829178	45830828	chrLG04_pilon_arrow	20517	18870	1651	1648	95.09	-
Gm14	1830	8325	chrLG03_pilon_arrow	45027300	45020808	6496	6493	99.22	-
Gm14	25331	27427	chrLG12_pilon_arrow	38294117	38292035	2097	2083	97.62	-
Gm14	321163	323684	chrLG02_pilon_arrow	48190219	48187689	2522	2531	95.82	-
Gm14	566346	568162	chrLG02_pilon_arrow	47961247	47959431	1817	1817	95.01	-
Gm14	584446	587906	chrLG02_pilon_arrow	47944286	47940839	3461	3448	95.04	-
Gm14	998383	1000933	chrLG17_pilon_arrow	12451861	12449337	2551	2525	97.03	-
Gm14	1001824	1005355	chrLG17_pilon_arrow	12430628	12427117	3532	3512	97.65	-
Gm14	1148986	1150255	chrLG09_pilon_arrow	25076515	25075246	1270	1270	97.09	-
Gm14	1209225	1212080	chrLG02_pilon_arrow	47355151	47352299	2856	2853	95.22	-
Gm14	1229555	1235645	chrLG02_pilon_arrow	47325127	47319016	6091	6112	96.96	-
Gm14	1678411	1679727	chrLG04_pilon_arrow	12191290	12189976	1317	1315	98.48	-
Gm14	1742606	1744717	chrLG02_pilon_arrow	46913363	46911243	2112	2121	95.01	-
Gm14	1956458	1961724	chrLG01_pilon_arrow	52250239	52244973	5267	5267	99.54	-
Gm14	2515552	2517013	chrLG08_pilon_arrow	34495229	34493769	1462	1461	99.59	-
Gm14	5343974	5346752	chrLG06_pilon_arrow	40499903	40497145	2779	2759	97.84	-
Gm14	5491139	5495727	chrLG02_pilon_arrow	43686367	43681764	4589	4604	95.8	-
Gm14	5648437	5650042	chrLG15_pilon_arrow	41237852	41236251	1606	1602	99.69	-
Gm14	6138949	6141380	chrLG09_pilon_arrow	35567558	35565132	2432	2427	97.09	-
Gm14	6164125	6165769	chrLG18_pilon_arrow	53423164	53421519	1645	1646	95.81	-
Gm14	6183309	6188219	chrLG05_pilon_arrow	30007143	30002236	4911	4908	95.71	-
Gm14	6414123	6419036	chrLG18_pilon_arrow	17497450	17492530	4914	4921	98.68	-
Gm14	6512933	6517641	chrLG16_pilon_arrow	5766437	5771145	4709	4709	98.9	+
Gm14	6667695	6670025	chrLG09_pilon_arrow	26690439	26688130	2331	2310	95.48	-
Gm14	6672171	6674343	chrLG09_pilon_arrow	26685681	26683529	2173	2153	97.2	-
Gm14	7108640	7121722	chrLG07_pilon_arrow	34755443	34768527	13083	13085	96.3	+
Gm14	7199528	7201657	chrLG12_pilon_arrow	20297681	20295554	2130	2128	97.89	-
Gm14	7388579	7390619	chrLG18_pilon_arrow	30313021	30310987	2041	2035	97.75	-
Gm14	7932017	7933995	chrLG05_pilon_arrow	11663716	11665721	1979	2006	98.36	+
Gm14	9028765	9033541	chrLG09_pilon_arrow	20872719	20867938	4777	4782	97.39	-
Gm14	9918566	9921446	chrLG15_pilon_arrow	24443885	24446777	2881	2893	97.9	+
Gm14	10440424	10443355	chrLG02_pilon_arrow	1133812	1130873	2932	2940	98.13	-
Gm14	10667315	10672848	chrLG04_pilon_arrow	43462482	43467995	5534	5514	98.37	+
Gm14	10793767	10796058	chrLG18_pilon_arrow	50123078	50120787	2292	2292	99	-
Gm14	10829109	10834050	chrLG10_pilon_arrow	9853621	9858550	4942	4930	99.39	+
Gm14	11725011	11734093	chrLG05_pilon_arrow	26804811	26795711	9083	9101	96.12	-
Gm14	12321159	12322686	chrLG07_pilon_arrow	1893638	1892109	1528	1530	96.34	-
Gm14	12976262	12982400	chrLG13_pilon_arrow	8243700	8249876	6139	6177	95.96	+
Gm14	13679145	13680428	chrLG05_pilon_arrow	1977402	1976116	1284	1287	97.2	-
Gm14	13682102	13686630	chrLG08_pilon_arrow	19043017	19038491	4529	4527	96.48	-
Gm14	13713622	13714774	chrLG08_pilon_arrow	19035630	19034470	1153	1161	97.07	-
Gm14	14177759	14190471	chrLG04_pilon_arrow	30250756	30263534	12713	12779	98.8	+
Gm14	14824584	14831192	chrLG18_pilon_arrow	27126029	27119372	6609	6658	95.55	-
Gm14	14863722	14870732	chrLG20_pilon_arrow	13180771	13173703	7011	7069	95.19	-
Gm14	14907894	14912803	chrLG12_pilon_arrow	23577754	23572841	4910	4914	99.02	-
Gm14	15102620	15106096	chrLG11_pilon_arrow	26650445	26646969	3477	3477	99.65	-
Gm14	15402779	15408276	chrLG13_pilon_arrow	7439302	7444804	5498	5503	96.34	+
Gm14	15442068	15447257	chrLG16_pilon_arrow	10384986	10379827	5190	5160	95.55	-
Gm14	15620634	15623831	chrLG09_pilon_arrow	19594286	19591089	3198	3198	96.07	-
Gm14	16393587	16398301	chrLG01_pilon_arrow	37589866	37585150	4715	4717	99.83	-
Gm14	16554691	16556415	chrLG05_pilon_arrow	15923553	15925277	1725	1725	99.54	+
Gm14	19883070	19887374	chrLG11_pilon_arrow	2543908	2539621	4305	4288	97.26	-
Gm14	19908981	19910321	chrLG11_pilon_arrow	1751609	1750272	1341	1338	98.06	-
Gm14	20779555	20783260	chrLG02_pilon_arrow	19930956	19934655	3706	3700	97.07	+
Gm14	20783297	20799542	chrLG18_pilon_arrow	28119673	28103386	16246	16288	97.17	-
Gm14	21150236	21157688	chrLG04_pilon_arrow	11283080	11290503	7453	7424	98.5	+
Gm14	21204522	21213222	chrLG04_pilon_arrow	11291247	11282594	8701	8654	97.7	-
Gm14	21341108	21342585	chrLG04_pilon_arrow	43272249	43270777	1478	1473	95.88	-
Gm14	21709906	21716193	chrLG06_pilon_arrow	17655510	17649250	6288	6261	95.79	-
Gm14	22276043	22282702	chrLG06_pilon_arrow	47961259	47954603	6660	6657	99.47	-
Gm14	23131943	23133839	chrLG03_pilon_arrow	39912227	39914127	1897	1901	98.63	+
Gm14	23328611	23330439	chrLG17_pilon_arrow	29018390	29020217	1829	1828	95.58	+
Gm14	23586592	23592767	chrLG19_pilon_arrow	11895295	11889075	6176	6221	98.31	-
Gm14	23614267	23620853	chrLG17_pilon_arrow	33725184	33718599	6587	6586	99.57	-
Gm14	23697941	23704088	chrLG12_pilon_arrow	21416183	21422346	6148	6164	95.45	+
Gm14	23827901	23830905	chrLG19_pilon_arrow	33966764	33963771	3005	2994	96.98	-
Gm14	23868272	23870499	chrLG19_pilon_arrow	33961159	33958930	2228	2230	97.81	-
Gm14	24161963	24174018	chrLG13_pilon_arrow	44585467	44573410	12056	12058	99.65	-	artificial translocation predicted by genetic map
Gm14	24951101	24960872	chrLG13_pilon_arrow	10300439	10290667	9772	9773	95.86	-
Gm14	25986958	25990455	chrLG02_pilon_arrow	20670077	20666576	3498	3502	98	-
Gm14	26066756	26070038	chrLG11_pilon_arrow	15932860	15929577	3283	3284	99.27	-
Gm14	26277156	26278809	chrLG06_pilon_arrow	17913600	17911947	1654	1654	99.15	-
Gm14	26679662	26681510	chrLG15_pilon_arrow	32968920	32970773	1849	1854	95.15	+
Gm14	27057662	27070806	chrLG03_pilon_arrow	10524639	10537790	13145	13152	98.27	+
Gm14	27762672	27772442	chrLG01_pilon_arrow	20916704	20926571	9771	9868	96.66	+
Gm14	27826164	27836142	chrLG11_pilon_arrow	32522983	32532957	9979	9975	96.69	+
Gm14	28027783	28032432	chrLG02_pilon_arrow	34807368	34812012	4650	4645	98.47	+
Gm14	28039988	28056074	chrLG15_pilon_arrow	21608032	21624159	16087	16128	98.72	+
Gm14	29371574	29376341	chrLG13_pilon_arrow	19700949	19696169	4768	4781	95.2	-
Gm14	29529733	29544679	chrLG06_pilon_arrow	31881140	31896088	14947	14949	97.9	+
Gm14	29825674	29831098	chrLG16_pilon_arrow	16281372	16286826	5425	5455	97.32	+
Gm14	30513659	30515511	chrLG06_pilon_arrow	39438384	39436531	1853	1854	95.85	-
Gm14	31059087	31062657	chrLG18_pilon_arrow	51829202	51825635	3571	3568	98.21	-
Gm14	31089573	31091778	chrLG05_pilon_arrow	19206358	19204153	2206	2206	97.12	-
Gm14	31396715	31400419	chrLG15_pilon_arrow	8213141	8209423	3705	3719	99.14	-
Gm14	31953393	31960935	chrLG10_pilon_arrow	26261162	26253621	7543	7542	99.39	-
Gm14	32018745	32019850	chrLG20_pilon_arrow	77603	76499	1106	1105	98.55	-
Gm14	33491985	33494372	chrLG10_pilon_arrow	31504998	31502614	2388	2385	96.09	-
Gm14	33505284	33514610	chrLG06_pilon_arrow	47961259	47951885	9327	9375	99.02	-
Gm14	34063172	34066499	chrLG10_pilon_arrow	23917195	23913838	3328	3358	96.67	-
Gm14	34504995	34506442	chrLG17_pilon_arrow	21270553	21269106	1448	1448	99.65	-
Gm14	35017103	35021872	chrLG20_pilon_arrow	47100045	47095288	4770	4758	95.87	-
Gm14	35046419	35050425	chrLG20_pilon_arrow	22929469	22925465	4007	4005	99.45	-
Gm14	35432318	35441290	chrLG10_pilon_arrow	24609877	24618871	8973	8995	97.7	+
Gm14	35737497	35742686	chrLG07_pilon_arrow	21656983	21662235	5190	5253	97.01	+
Gm14	35748211	35753483	chrLG10_pilon_arrow	16369412	16364131	5273	5282	97.06	-
Gm14	36058167	36065048	chrLG07_pilon_arrow	31866022	31872916	6882	6895	96.86	+
Gm14	36297183	36300301	chrLG06_pilon_arrow	34552187	34549076	3119	3112	98.33	-
Gm14	36800645	36808791	chrLG11_pilon_arrow	13539497	13531382	8147	8116	97.44	-
Gm14	36993222	36996891	chrLG18_pilon_arrow	21121096	21124768	3670	3673	97.7	+
Gm14	37643507	37647813	chrLG12_pilon_arrow	12386842	12382535	4307	4308	98.89	-
Gm14	38104978	38108885	chrLG03_pilon_arrow	13715079	13718929	3908	3851	96.96	+
Gm14	38430154	38440860	chrLG08_pilon_arrow	26908462	26897737	10707	10726	99.4	-
Gm14	38441093	38443652	chrLG08_pilon_arrow	26911601	26909041	2560	2561	99.26	-
Gm14	38590455	38599676	chrLG18_pilon_arrow	39321338	39312121	9222	9218	97.95	-
Gm14	39053717	39063002	chrLG18_pilon_arrow	23955676	23946384	9286	9293	99.43	-
Gm14	39347858	39356962	chrLG15_pilon_arrow	29310172	29301093	9105	9080	98.04	-
Gm14	39362753	39365823	chrLG07_pilon_arrow	31092909	31095997	3071	3089	98.22	+
Gm14	39607709	39615963	chrLG09_pilon_arrow	27542761	27534449	8255	8313	95.04	-
Gm14	39856461	39861720	chrLG17_pilon_arrow	33343723	33338476	5260	5248	96.12	-
Gm14	41404314	41410637	chrLG07_pilon_arrow	12287089	12280782	6324	6308	97.98	-
Gm14	41604315	41606580	chrLG18_pilon_arrow	36624795	36622531	2266	2265	99.12	-
Gm14	41683068	41684854	chrLG07_pilon_arrow	38723650	38721882	1787	1769	96.98	-
Gm14	41704574	41706683	chrLG11_pilon_arrow	20397763	20395666	2110	2098	96.22	-
Gm14	41852426	41854714	chrLG07_pilon_arrow	13998606	13996316	2289	2291	99.83	-
Gm14	42958149	42960501	chrLG05_pilon_arrow	35431319	35429008	2353	2312	95.97	-
Gm14	43383054	43384926	chrLG15_pilon_arrow	35999714	35997841	1873	1874	99.63	-
Gm14	43935383	43948223	chrLG01_pilon_arrow	36507928	36520782	12841	12855	97.53	+
Gm14	45669979	45671459	chrLG18_pilon_arrow	36448367	36449847	1481	1481	99.59	+
Gm14	46172157	46173891	chrLG02_pilon_arrow	41638434	41636705	1735	1730	95.06	-
Gm14	46489007	46493936	chrLG04_pilon_arrow	43116118	43111243	4930	4876	98.36	-
Gm14	47343603	47351800	chrLG05_pilon_arrow	32491294	32499510	8198	8217	99.38	+
Gm14	47368180	47370270	chrLG18_pilon_arrow	42558218	42556135	2091	2084	95.6	-
Gm14	47978688	47979992	chrLG02_pilon_arrow	4568728	4567417	1305	1312	97.41	-
Gm14	48127077	48128790	chrLG13_pilon_arrow	21181818	21180105	1714	1714	99.59	-
Gm14	48354511	48357034	chrLG05_pilon_arrow	38970226	38967747	2524	2480	96.01	-
Gm14	48357034	48360376	chrLG05_pilon_arrow	38967363	38963994	3343	3370	97.66	-
Gm14	48949727	48956529	chrLG03_pilon_arrow	44217237	44210440	6803	6798	98.46	-
Gm15	1	1042	chrLG09_pilon_arrow	46539927	46538886	1042	1042	100	-
Gm15	140894	143309	chrLG13_pilon_arrow	46462870	46460448	2416	2423	95.03	-
Gm15	432967	434524	chrLG13_pilon_arrow	46149769	46148221	1558	1549	95.14	-
Gm15	515342	518776	chrLG14_pilon_arrow	17760818	17764247	3435	3430	99.62	+
Gm15	724622	727033	chrLG13_pilon_arrow	45807009	45804586	2412	2424	95.71	-
Gm15	1717053	1722621	chrLG16_pilon_arrow	32834617	32829047	5569	5571	98.24	-
Gm15	2007858	2009034	chrLG13_pilon_arrow	44631287	44630114	1177	1174	98.39	-
Gm15	2022030	2027320	chrLG03_pilon_arrow	39486913	39481584	5291	5330	96.63	-
Gm15	2027781	2029298	chrLG03_pilon_arrow	39480521	39479006	1518	1516	98.49	-
Gm15	2029299	2032964	chrLG03_pilon_arrow	39477665	39473990	3666	3676	97.46	-
Gm15	2114428	2118074	chrLG07_pilon_arrow	33314069	33310425	3647	3645	99.32	-
Gm15	2336595	2338021	chrLG20_pilon_arrow	2139580	2138153	1427	1428	95.8	-
Gm15	2402187	2405405	chrLG13_pilon_arrow	44267496	44264296	3219	3201	95.33	-
Gm15	2565599	2568206	chrLG13_pilon_arrow	44117335	44114725	2608	2611	95.41	-
Gm15	2688743	2691244	chrLG13_pilon_arrow	43985797	43983295	2502	2503	95.17	-
Gm15	2776219	2779450	chrLG13_pilon_arrow	43895766	43892515	3232	3252	95.24	-
Gm15	3556316	3558257	chrLG13_pilon_arrow	43117192	43115251	1942	1942	95.12	-
Gm15	4012899	4016327	chrLG03_pilon_arrow	14216525	14219948	3429	3424	96.19	+
Gm15	4035355	4040603	chrLG07_pilon_arrow	40373911	40368663	5249	5249	99.31	-
Gm15	4508286	4510714	chrLG08_pilon_arrow	33051153	33048726	2429	2428	97.33	-
Gm15	5491746	5493520	chrLG13_pilon_arrow	35933389	35931619	1775	1771	95.23	-
Gm15	7030252	7036836	chrLG17_pilon_arrow	36632279	36625697	6585	6583	99.14	-
Gm15	9228134	9229534	chrLG02_pilon_arrow	22074408	22073003	1401	1406	98.08	-
Gm15	9602436	9604960	chrLG09_pilon_arrow	37737550	37735025	2525	2526	97.37	-
Gm15	9605233	9610827	chrLG09_pilon_arrow	37735019	37729438	5595	5582	96.24	-
Gm15	9632452	9634439	chrLG20_pilon_arrow	23961977	23960006	1988	1972	97.59	-
Gm15	10766632	10768087	chrLG03_pilon_arrow	6320058	6321518	1456	1461	99.18	+
Gm15	11626130	11627347	chrLG18_pilon_arrow	40586808	40585591	1218	1218	97.46	-
Gm15	11686333	11687658	chrLG10_pilon_arrow	18747696	18746377	1326	1320	95.79	-
Gm15	11734727	11736321	chrLG19_pilon_arrow	34271982	34270392	1595	1591	96.12	-
Gm15	13286886	13291723	chrLG17_pilon_arrow	31283829	31278991	4838	4839	99.17	-
Gm15	13426669	13431615	chrLG01_pilon_arrow	47461082	47456136	4947	4947	99.82	-
Gm15	13495706	13501771	chrLG03_pilon_arrow	17791112	17797179	6066	6068	99.51	+
Gm15	13505578	13513603	chrLG03_pilon_arrow	17801233	17809259	8026	8027	99.51	+
Gm15	13788814	13790886	chrLG18_pilon_arrow	24988301	24986222	2073	2080	98.65	-
Gm15	14051929	14053441	chrLG16_pilon_arrow	23737238	23735725	1513	1514	95.84	-
Gm15	14719102	14720734	chrLG18_pilon_arrow	26676618	26678243	1633	1626	95.35	+
Gm15	15063705	15066688	chrLG10_pilon_arrow	12902498	12905483	2984	2986	95.41	+
Gm15	15158756	15161704	chrLG17_pilon_arrow	29171879	29168943	2949	2937	98.41	-
Gm15	15611803	15615492	chrLG10_pilon_arrow	7440184	7436489	3690	3696	97.16	-
Gm15	15820119	15821213	chrLG11_pilon_arrow	22558053	22556958	1095	1096	97.36	-
Gm15	16035240	16037736	chrLG01_pilon_arrow	37585292	37587786	2497	2495	98.56	+
Gm15	16647421	16654994	chrLG05_pilon_arrow	19773070	19765447	7574	7624	96.16	-
Gm15	17410692	17411876	chrLG20_pilon_arrow	32478459	32479643	1185	1185	99.92	+
Gm15	18718273	18720277	chrLG01_pilon_arrow	50804923	50802937	2005	1987	95.87	-
Gm15	18913484	18916450	chrLG06_pilon_arrow	25618445	25621407	2967	2963	98.72	+
Gm15	19404575	19407468	chrLG02_pilon_arrow	14778901	14776007	2894	2895	98	-
Gm15	19407469	19416596	chrLG04_pilon_arrow	12811531	12820623	9128	9093	98.38	+
Gm15	19416596	19419538	chrLG10_pilon_arrow	22277768	22280702	2943	2935	97.15	+
Gm15	19427924	19433330	chrLG16_pilon_arrow	2118930	2124336	5407	5407	99.82	+
Gm15	19629204	19630836	chrLG08_pilon_arrow	19393869	19392237	1633	1633	97.12	-
Gm15	19750276	19753479	chrLG06_pilon_arrow	46384728	46387932	3204	3205	99.56	+
Gm15	20088913	20092505	chrLG10_pilon_arrow	34403312	34399704	3593	3609	95.13	-
Gm15	20922066	20923884	chrLG17_pilon_arrow	35365323	35363506	1819	1818	96.65	-
Gm15	20964236	20967574	chrLG09_pilon_arrow	3625532	3622156	3339	3377	95.77	-
Gm15	20968157	20973661	chrLG09_pilon_arrow	3621528	3616031	5505	5498	96.13	-
Gm15	21000633	21002225	chrLG08_pilon_arrow	32911104	32909520	1593	1585	96.93	-
Gm15	21117341	21122284	chrLG18_pilon_arrow	15050025	15045076	4944	4950	98.89	-
Gm15	21180438	21185977	chrLG08_pilon_arrow	23943552	23938006	5540	5547	98.5	-
Gm15	22191556	22193212	chrLG07_pilon_arrow	13186701	13185050	1657	1652	97.23	-
Gm15	22209667	22214055	chrLG19_pilon_arrow	15491636	15487249	4389	4388	98.63	-
Gm15	22307653	22309003	chrLG03_pilon_arrow	35268773	35267422	1351	1352	98.74	-
Gm15	22918684	22926567	chrLG12_pilon_arrow	14664527	14656621	7884	7907	98.61	-
Gm15	23303077	23317635	chrLG18_pilon_arrow	25497739	25483139	14559	14601	98.43	-
Gm15	23325688	23327680	chrLG19_pilon_arrow	42449201	42451195	1993	1995	96.8	+
Gm15	23692390	23697579	chrLG16_pilon_arrow	22821542	22816326	5190	5217	95.67	-
Gm15	24022469	24039093	chrLG01_pilon_arrow	26364435	26381145	16625	16711	97.65	+
Gm15	24584010	24598478	chrLG20_pilon_arrow	28221253	28206761	14469	14493	98.07	-
Gm15	24686236	24689293	chrLG18_pilon_arrow	37465882	37462824	3058	3059	99.15	-
Gm15	24695084	24698377	chrLG09_pilon_arrow	36510815	36507512	3294	3304	95.95	-
Gm15	24994033	25010743	chrLG18_pilon_arrow	28102911	28119668	16711	16758	97.94	+
Gm15	25248902	25253776	chrLG18_pilon_arrow	22976736	22971867	4875	4870	99.04	-
Gm15	25428992	25435112	chrLG06_pilon_arrow	21321097	21314980	6121	6118	97.69	-
Gm15	25664665	25665990	chrLG18_pilon_arrow	1924780	1926105	1326	1326	99.7	+
Gm15	26497316	26506652	chrLG14_pilon_arrow	43152008	43142694	9337	9315	98.98	-
Gm15	27408613	27409806	chrLG03_pilon_arrow	15806610	15805419	1194	1192	99.16	-
Gm15	27412109	27413943	chrLG08_pilon_arrow	33058643	33060474	1835	1832	99.73	+	artificial translocation predicted by genetic map
Gm15	27420152	27421417	chrLG03_pilon_arrow	15796676	15795412	1266	1265	97.39	-
Gm15	27664075	27673795	chrLG13_pilon_arrow	13734467	13724702	9721	9766	96.76	-
Gm15	27917984	27919336	chrLG14_pilon_arrow	26604394	26603041	1353	1354	99.26	-
Gm15	28242604	28245187	chrLG10_pilon_arrow	27352623	27355215	2584	2593	98.77	+
Gm15	28357841	28361246	chrLG11_pilon_arrow	22726172	22722765	3406	3408	97.28	-
Gm15	28638205	28645950	chrLG07_pilon_arrow	31810224	31817994	7746	7771	99.12	+
Gm15	29214645	29218316	chrLG08_pilon_arrow	24022267	24018583	3672	3685	95.96	-
Gm15	29257443	29258699	chrLG08_pilon_arrow	1541746	1540484	1257	1263	96.91	-
Gm15	29349174	29352320	chrLG01_pilon_arrow	31932233	31935373	3147	3141	97.3	+
Gm15	29563446	29566768	chrLG04_pilon_arrow	24623621	24620303	3323	3319	96.74	-
Gm15	29566806	29572506	chrLG04_pilon_arrow	24617631	24611996	5701	5636	96.03	-
Gm15	29615783	29620632	chrLG04_pilon_arrow	18772685	18767840	4850	4846	95.6	-
Gm15	29680618	29682197	chrLG12_pilon_arrow	31621126	31622705	1580	1580	99.75	+
Gm15	29726809	29729200	chrLG04_pilon_arrow	21776817	21774426	2392	2392	96.22	-
Gm15	29918941	29924135	chrLG02_pilon_arrow	30938634	30943830	5195	5197	97.66	+
Gm15	29982061	29989944	chrLG14_pilon_arrow	23178530	23186470	7884	7941	96.81	+
Gm15	30364572	30368092	chrLG06_pilon_arrow	24152617	24149097	3521	3521	99.49	-
Gm15	30718727	30720956	chrLG12_pilon_arrow	24329006	24326786	2230	2221	98.84	-
Gm15	30721169	30723871	chrLG12_pilon_arrow	24326573	24323864	2703	2710	97.31	-
Gm15	30819991	30826511	chrLG10_pilon_arrow	19333149	19326630	6521	6520	99.28	-
Gm15	31398087	31403322	chrLG11_pilon_arrow	21202202	21207456	5236	5255	99.13	+
Gm15	31409937	31416183	chrLG11_pilon_arrow	18346372	18340098	6247	6275	98.88	-
Gm15	32072092	32076469	chrLG04_pilon_arrow	33307466	33303090	4378	4377	98.95	-
Gm15	32436141	32440988	chrLG03_pilon_arrow	19878100	19873253	4848	4848	99.63	-
Gm15	33080855	33083131	chrLG05_pilon_arrow	27102979	27100691	2277	2289	95.69	-
Gm15	33189160	33197331	chrLG14_pilon_arrow	37885457	37877214	8172	8244	98.18	-
Gm15	33245718	33249740	chrLG04_pilon_arrow	36368379	36364376	4023	4004	98.86	-
Gm15	33275811	33289352	chrLG20_pilon_arrow	12485748	12499266	13542	13519	98.9	+
Gm15	33294996	33309654	chrLG10_pilon_arrow	19337189	19322546	14659	14644	98.9	-
Gm15	33980350	33985752	chrLG05_pilon_arrow	23084852	23079465	5403	5388	98.39	-
Gm15	33988802	33993940	chrLG02_pilon_arrow	18982985	18988136	5139	5152	95.59	+
Gm15	33994961	34005575	chrLG19_pilon_arrow	17008379	17019009	10615	10631	99.07	+
Gm15	34536172	34545450	chrLG09_pilon_arrow	13386900	13377618	9279	9283	99.36	-
Gm15	34658485	34663637	chrLG20_pilon_arrow	27690410	27695574	5153	5165	98.84	+
Gm15	34859406	34864939	chrLG16_pilon_arrow	16502262	16507801	5534	5540	98.16	+
Gm15	35476484	35478337	chrLG14_pilon_arrow	16678354	16680202	1854	1849	95.15	+
Gm15	35516079	35524242	chrLG16_pilon_arrow	11613890	11605746	8164	8145	97.31	-
Gm15	36353587	36360999	chrLG12_pilon_arrow	10266682	10259245	7413	7438	96.83	-
Gm15	36412949	36422461	chrLG13_pilon_arrow	7525910	7535393	9513	9484	98.45	+
Gm15	36565987	36578795	chrLG13_pilon_arrow	6416740	6429553	12809	12814	99.2	+
Gm15	36849539	36854031	chrLG10_pilon_arrow	29945240	29940741	4493	4500	99.09	-
Gm15	36992417	36996275	chrLG04_pilon_arrow	20811655	20815494	3859	3840	98.32	+
Gm15	36999536	37003375	chrLG04_pilon_arrow	20818755	20822613	3840	3859	98.29	+
Gm15	37072596	37228836	chrLG04_pilon_arrow	20740135	20583897	156241	156239	99.98	-
Gm15	37232582	37234352	chrLG04_pilon_arrow	20577634	20575867	1771	1768	99.04	-
Gm15	37247197	37256428	chrLG04_pilon_arrow	20567281	20558036	9232	9246	99.46	-
Gm15	37257207	37264541	chrLG04_pilon_arrow	20556672	20549328	7335	7345	99.67	-
Gm15	37264642	37266231	chrLG04_pilon_arrow	20547582	20545997	1590	1586	98.37	-
Gm15	37297561	37299682	chrLG04_pilon_arrow	20519301	20517176	2122	2126	99.81	-
Gm15	37452560	37457154	chrLG13_pilon_arrow	7537037	7532444	4595	4594	99.96	-
Gm15	37457273	37489029	chrLG13_pilon_arrow	7531400	7499641	31757	31760	99.96	-
Gm15	37489288	37503014	chrLG13_pilon_arrow	7499675	7485954	13727	13722	99.96	-
Gm15	37616468	37618452	chrLG13_pilon_arrow	7368534	7366541	1985	1994	97.9	-
Gm15	38185658	38191382	chrLG13_pilon_arrow	6795431	6789707	5725	5725	100	-
Gm15	38203019	38207832	chrLG13_pilon_arrow	6776781	6771965	4814	4817	99.92	-
Gm15	38209429	38210586	chrLG13_pilon_arrow	6770271	6769113	1158	1159	99.91	-
Gm15	38214912	38216223	chrLG13_pilon_arrow	6764976	6763662	1312	1315	99.54	-
Gm15	38229239	38345816	chrLG13_pilon_arrow	6750647	6634052	116578	116596	99.93	-
Gm15	38346100	38531103	chrLG13_pilon_arrow	6633774	6448781	185004	184994	99.98	-
Gm15	38531263	38533612	chrLG13_pilon_arrow	6448621	6446274	2350	2348	99.87	-
Gm15	38543684	38565778	chrLG13_pilon_arrow	6442979	6420914	22095	22066	99.61	-
Gm15	38567395	38591980	chrLG13_pilon_arrow	6419492	6394906	24586	24587	99.58	-
Gm15	39124860	39137720	chrLG05_pilon_arrow	16118370	16105515	12861	12856	99.91	-
Gm15	39137869	39139400	chrLG05_pilon_arrow	16105367	16103836	1532	1532	100	-
Gm15	39163259	39165591	chrLG05_pilon_arrow	16076950	16074628	2333	2323	96.66	-
Gm15	39289544	39292935	chrLG13_pilon_arrow	46556867	46560249	3392	3383	98.88	+
Gm15	39330753	39347759	chrLG05_pilon_arrow	15970958	15953954	17007	17005	99.64	-
Gm15	39377708	39381298	chrLG05_pilon_arrow	15926425	15922832	3591	3594	99.64	-
Gm15	39381399	39383829	chrLG05_pilon_arrow	15922789	15920359	2431	2431	99.71	-
Gm15	39402228	39404637	chrLG05_pilon_arrow	15898339	15895930	2410	2410	100	-
Gm15	39404794	39406089	chrLG05_pilon_arrow	15895852	15894557	1296	1296	99.77	-
Gm15	39406264	39411919	chrLG05_pilon_arrow	15908886	15903231	5656	5656	99.89	-
Gm15	39416789	39423550	chrLG05_pilon_arrow	15891224	15884456	6762	6769	99.7	-
Gm15	39454351	39455970	chrLG06_pilon_arrow	33520663	33519044	1620	1620	99.75	-
Gm15	39764736	39767139	chrLG17_pilon_arrow	34239326	34241713	2404	2388	98.55	+
Gm15	39908857	39911522	chrLG08_pilon_arrow	7798738	7796073	2666	2666	99.7	-
Gm15	41107573	41113737	chrLG19_pilon_arrow	9591490	9585306	6165	6185	97.54	-
Gm15	42376906	42385056	chrLG19_pilon_arrow	12761886	12753697	8151	8190	97.94	-
Gm15	43047603	43050884	chrLG04_pilon_arrow	42745025	42741726	3282	3300	96.65	-
Gm15	43407625	43410759	chrLG20_pilon_arrow	34940058	34936849	3135	3210	96.3	-
Gm15	44217839	44219193	chrLG10_pilon_arrow	25633904	25635251	1355	1348	96.17	+
Gm15	44965387	44967839	chrLG12_pilon_arrow	37402685	37400229	2453	2457	96.88	-
Gm15	45038408	45041171	chrLG09_pilon_arrow	7601448	7598686	2764	2763	98.52	-
Gm15	45188079	45189701	chrLG03_pilon_arrow	41467439	41465819	1623	1621	97.06	-
Gm15	45220014	45227112	chrLG20_pilon_arrow	25583373	25590470	7099	7098	97.89	+
Gm15	45741722	45743618	chrLG07_pilon_arrow	882273	880371	1897	1903	96.9	-
Gm15	45824802	45827075	chrLG03_pilon_arrow	19099586	19097304	2274	2283	96.34	-
Gm15	46029358	46033220	chrLG18_pilon_arrow	16724360	16720512	3863	3849	98.81	-
Gm15	46083868	46087040	chrLG18_pilon_arrow	24636878	24640051	3173	3174	99.31	+
Gm15	46217326	46218747	chrLG12_pilon_arrow	22087596	22086177	1422	1420	95.02	-
Gm15	46751069	46754402	chrLG05_pilon_arrow	7101958	7098598	3334	3361	97.59	-
Gm15	47599666	47601423	chrLG13_pilon_arrow	33938694	33936942	1758	1753	98.18	-
Gm15	48046451	48049228	chrLG01_pilon_arrow	29168382	29165595	2778	2788	98.82	-
Gm15	48079091	48082178	chrLG08_pilon_arrow	14066944	14063845	3088	3100	95.14	-
Gm15	48249314	48256551	chrLG08_pilon_arrow	13939269	13932060	7238	7210	95.03	-
Gm15	48269654	48272997	chrLG02_pilon_arrow	5276256	5272913	3344	3344	99.94	-
Gm15	49633023	49635790	chrLG01_pilon_arrow	29805527	29808299	2768	2773	95.67	+
Gm15	50237259	50239149	chrLG07_pilon_arrow	20248780	20246892	1891	1889	98.21	-
Gm15	50462080	50466715	chrLG09_pilon_arrow	32552233	32547621	4636	4613	98.96	-
Gm15	51065635	51067247	chrLG17_pilon_arrow	14684126	14682503	1613	1624	96.37	-
Gm15	51200490	51202944	chrLG06_pilon_arrow	43796166	43793715	2455	2452	97.27	-
Gm15	51634735	51637024	chrLG17_pilon_arrow	39876389	39874099	2290	2291	95	-
Gm16	7375	10558	chrLG05_pilon_arrow	40491800	40488656	3184	3145	96.47	-
Gm16	347656	349166	chrLG05_pilon_arrow	31774124	31772621	1511	1504	95.53	-
Gm16	391988	393026	chrLG10_pilon_arrow	12515735	12516773	1039	1039	99.23	+
Gm16	626632	627987	chrLG13_pilon_arrow	35034271	35032917	1356	1355	99.85	-
Gm16	872064	875250	chrLG08_pilon_arrow	16062812	16059626	3187	3187	99.81	-
Gm16	1439692	1442286	chrLG06_pilon_arrow	18628761	18626152	2595	2610	97.18	-
Gm16	1590099	1591538	chrLG20_pilon_arrow	32703214	32701794	1440	1421	95.56	-
Gm16	1742144	1754272	chrLG14_pilon_arrow	46245417	46233283	12129	12135	97.42	-
Gm16	1829759	1832553	chrLG08_pilon_arrow	22171072	22168299	2795	2774	95.58	-
Gm16	4212543	4213821	chrLG19_pilon_arrow	4208294	4207011	1279	1284	96.12	-
Gm16	5081496	5083731	chrLG17_pilon_arrow	22351066	22348832	2236	2235	97.94	-
Gm16	5471599	5482955	chrLG06_pilon_arrow	16387267	16375940	11357	11328	98.25	-
Gm16	5944377	5947586	chrLG15_pilon_arrow	1853635	1850485	3210	3151	96.52	-
Gm16	6799950	6802783	chrLG20_pilon_arrow	3177420	3180245	2834	2826	96.69	+
Gm16	9443020	9444447	chrLG01_pilon_arrow	45519917	45518489	1428	1429	97.34	-
Gm16	9667932	9672900	chrLG20_pilon_arrow	15916351	15911375	4969	4977	99.42	-
Gm16	9815317	9819180	chrLG07_pilon_arrow	20442554	20438687	3864	3868	98.04	-
Gm16	10553730	10558889	chrLG14_pilon_arrow	32354655	32359844	5160	5190	95.42	+
Gm16	10562591	10564064	chrLG08_pilon_arrow	5914045	5912587	1474	1459	95.33	-
Gm16	10565159	10566827	chrLG04_pilon_arrow	39008180	39006520	1669	1661	95.63	-
Gm16	10668437	10674541	chrLG01_pilon_arrow	46262	40157	6105	6106	97.94	-
Gm16	10827614	10837375	chrLG06_pilon_arrow	23101968	23111668	9762	9701	96.63	+
Gm16	11097703	11106632	chrLG10_pilon_arrow	13285880	13294847	8930	8968	98.45	+
Gm16	11537222	11541721	chrLG19_pilon_arrow	10120453	10124952	4500	4500	98.82	+
Gm16	12599135	12601026	chrLG04_pilon_arrow	12844619	12842726	1892	1894	97.05	-
Gm16	12641747	12646111	chrLG10_pilon_arrow	25025437	25029802	4365	4366	99.2	+
Gm16	13030504	13033917	chrLG04_pilon_arrow	5030188	5026760	3414	3429	98.02	-
Gm16	13280952	13284549	chrLG06_pilon_arrow	39922918	39926519	3598	3602	96.4	+
Gm16	13295386	13300538	chrLG12_pilon_arrow	24198152	24203317	5153	5166	96.82	+
Gm16	13627658	13634319	chrLG18_pilon_arrow	24292904	24299568	6662	6665	98.59	+
Gm16	14197146	14199682	chrLG20_pilon_arrow	25767541	25765004	2537	2538	99.88	-
Gm16	14401771	14407308	chrLG15_pilon_arrow	33585940	33591473	5538	5534	98.23	+
Gm16	14846954	14850761	chrLG07_pilon_arrow	9187281	9183491	3808	3791	98.27	-
Gm16	14855662	14858375	chrLG07_pilon_arrow	9183491	9180795	2714	2697	98.6	-
Gm16	14970975	14972902	chrLG20_pilon_arrow	3420568	3418622	1928	1947	95.4	-
Gm16	15643740	15660287	chrLG11_pilon_arrow	27136782	27120237	16548	16546	99.98	-
Gm16	15683957	15688429	chrLG11_pilon_arrow	27100026	27095554	4473	4473	99.93	-
Gm16	15859978	15864330	chrLG19_pilon_arrow	16824298	16819928	4353	4371	98.13	-
[truncated: 505 more rows]
